# Supplementary material for: Netrin-1 regulates the balance of synaptic glutamate signaling in the adult ventral tegmental area
Source: eLife. 2023 Mar 17;12:e83760. doi: 10.7554/eLife.83760 (PMC10023152; doi:10.7554/eLife.83760)
Supplement: Figure 1—source data 1. [file elife-83760-fig1-data1.xlsx]

## Sheet: TH Count
Control					DatiCre Ntn1 cKO
202.583	172	160			202	154	160	177.167

## Sheet: Fig 1 E
Th+				Vgat+
83.3013	76.3793	65.9872	65.2731	23.1286	11.3218	17.7058	20.2293

## Sheet: Fig 1 F
	Ntn1+				Ntn1-
Th+	78.9091	62.8072	55.683	59.901	21.0909	37.1928	44.317	40.099
Vgat+	41.7678	21.5066	23.2302	35.2941	58.2322	78.4934	76.7698	64.7059
