# Supplementary material for: Netrin-1 regulates the balance of synaptic glutamate signaling in the adult ventral tegmental area
Source: eLife. 2023 Mar 17;12:e83760. doi: 10.7554/eLife.83760 (PMC10023152; doi:10.7554/eLife.83760)
Supplement: Figure 2—source data 1. [file elife-83760-fig2-data1.xlsx]

## Sheet: Fig 2 E
Control		DATIRESCre Ntn1 cKO
78.2634	77.5318	5.0505	17.1429
