# Supplementary material for: Netrin-1 regulates the balance of synaptic glutamate signaling in the adult ventral tegmental area
Source: eLife. 2023 Mar 17;12:e83760. doi: 10.7554/eLife.83760 (PMC10023152; doi:10.7554/eLife.83760)
Supplement: Figure 3—source data 1. [file elife-83760-fig3-data1.xlsx]

## Sheet: Dat DA EPSC amp
Control																																								DATIRES Cre Ntn1 cKO
14.7118	38.7729	11.4929	20.0219	15.1636	14.8986	17.695	11.5266	10.7343	12.4926	18.3498	13.6396	18.8499	13.0467	20.3806	15.8785	15.0724	14.2797	35.4897	15.263	26.2302	11.9751	22.8743	23.8921	17.0662	17.9001	14.4491	12.6071	14.595	17.4319	21.8224	21.9987	17.4242	24.0358	23.8763						10.7413	10.1326	10.1061	12.7578	14.5585	16.2788	25.5399	20.7739	12.4084	12.9965
[truncated: 23 more columns]

## Sheet: DAT DA EPSC freq
Control																																								DATIRES Cre Ntn1 cKO
2.4457	11.6279	2.58905	9.0282	2.21872	3.84415	1.1578	2.51777	4.34451	2.74451	5.21228	5.9435	9.28479	4.8649	14.1323	5.02841	8.38209	3.4388	3.85442	4.82006	9.99993	4.12118	4.88087	4.91575	7.95971	3.33867	3.45896	3.82699	4.84452	8.24289	10.2977	4.89095	14.0127	8.29681	7.90242						3.80494	2.38794	0.542979	4.2251	3.96653	2.56423	0.958732	0.605043	3.37309	1.93331
[truncated: 23 more columns]

## Sheet: DAT GABA EPSC amp
Control																																								DATIRES Cre Ntn1 cKO
35.5924	18.7525	17.1701	22.1928	15.5143	16.0363	15.1858	14.9001	13.1212	10.6372	13.9952	11.4629	14.4842	13.2012	15.0025	14.7078																									21.759	19.5565	20.3973	16.806	20.6984	12.6167	13.044	20.1401	12.2909	15.361
[truncated: 1 more columns]

## Sheet: DAT GABA EPSC Freq
Control																																								DATIRES Cre Ntn1 cKO
15.5527	8.68536	5.81546	4.02139	3.6468	3.48773	2.07255	5.75592	5.57337	5.04583	6.40949	6.72424	9.39146	1.75343	4.53256	5.86027																									13.9465	10.908	4.37374	4.61525	9.41502	5.80073	6.26561	7.88896	8.28528	5.75242
[truncated: 1 more columns]

## Sheet: Vgat DA EPSC amp
Control																																								Vgat Ntn1 cKO
15.3889	17.7317	22.5485	11.6412	21.1739	10.6877	10.8992	10.0082	11.1689	13.1343	12.1807	16.3374	9.31744	7.46978	22.0644																										22.5985	32.1794	21.6473	10.1598	16.5318	32.7703	13.3579	9.57758	11.1613	11.3281
[truncated: 10 more columns]

## Sheet: Vgat DA EPSC freq
Control																									Vgat Ntn1 cKO
5.65065	3.08007	6.45514	9.72428	9.05092	5.81704	1.61499	2.01213	8.16417	7.46094	1.71708	11.2543	5.04661	6.08088	14.7713											8.7857	5.72592	2.82435	0.887833	5.01798	7.05806	4.0946	6.83318	4.20848	5.57741	5.11176	8.92586	4.70075	5.80776	4.18519	7.68348	6.00538	7.55127	4.25281	5.35067

## Sheet: Vgat GABA EPSC amp
Control																																								Vgat Ntn1 cKO
15.5014	17.6667	24.8442	15.1502	13.861	13.0569	9.14204	17.6896	13.5818	23.0328	26.5214	23.698	10.1528	12.6246	17.425	17.1252	13.9986	12.1124	9.94856	16.9419	19.005	15.1424	13.1346	9.41995	12.3432	10.6763	8.72578	12.2648	10.9901	11.9473											15.0103	20.578	15.6705	14.8112	8.76545	8.58164	11.056	7.22003	6.94644	15.253
[truncated: 22 more columns]

## Sheet: Vgat GABA EPSC freq
Control																																								Vgat Ntn1 cKO
5.32423	10.6894	7.11143	9.1464	1.77206	3.76411	7.74804	9.8165	14.4335	3.60529	12.0227	7.78703	3.0524	4.14602	8.31487	6.24331	7.35348	4.94953	8.79734	11.1883	5.97979	12.2827	15.8619	14.2757	8.46406	11.3327	5.07908	15.4845	18.2535	13.287											5.25694	2.22059	5.8734	1.80339	5.87663	0.931846	1.37858	0.631553	1.49175	8.06776
[truncated: 22 more columns]

## Sheet: DAT DA IPSC amp
Control																														DATIRES Cre Ntn1 cKO
23.0373	40.0994	15.1689	30.8123	44.3785	20.0633	16.9841	15.9454	14.8863	21.3888	33.2847	62.8006	32.2144	24.4487	28.1466	25.3826	19.9296	17.9506	14.2507	17.1851											41.676	26.0125	40.9457	39.6583	44.3396	34.7949	19.0363	30.0863	17.5018	14.702	15.8357	39.1016	36.9626	27.7863	21.3652	12.0247	18.0185	28.0206	18.4717	30.0965
[truncated: 7 more columns]

## Sheet: DAT DA IPSC Freq
Control																														DATIRES Cre Ntn1 cKO
7.17782	10.5846	9.06054	11.5569	6.49573	12.7834	4.66758	3.5139	4.0697	6.05556	9.27982	15.987	7.90081	7.00686	7.94731	7.41381	5.23595	3.95859	7.92009	3.84751											10.2974	5.13183	11.0321	6.81253	6.44244	6.31912	5.42299	11.7719	6.60737	4.74585	5.39846	11.8206	9.02837	16.1781	7.44099	3.65765	5.66804	4.6774	4.85212	9.07178
[truncated: 7 more columns]

[truncated: 8 more sheets: DAT GABA IPSC amp, DAT GABA IPSC freq, Vgat DA IPSC amp, Vgat DA IPSC freq, Vgat GABA IPSC amp, Vgat GABA IPSC freq, Fig 3 J Paired Pulse Ratio, Fig 3 K Paired Pulse Ratio]
