# Supplementary material for: Netrin-1 regulates the balance of synaptic glutamate signaling in the adult ventral tegmental area
Source: eLife. 2023 Mar 17;12:e83760. doi: 10.7554/eLife.83760 (PMC10023152; doi:10.7554/eLife.83760)
Supplement: Figure 3—source data 2. [file elife-83760-fig3-data2.xlsx]

## Sheet: Sup 3 A
Control																			sgNtn1
120.8	250.2	90.3	470.6	267.3	135.5	352.2	85.4												104.4	257	113.5	17.7	191.7	85.4	59.2	123.9	92.8	180.2	147.1	36.6	42.1	139.2	62.3	68.4	81.8

## Sheet: Sup 3 B_x0009_
	Control																	sgNtn1
10	4.36787	-2.05024	1.49485	0.384168	0.505084	-2.74212	-2.37584	4.25121										5.39438	-0.6186	-6.009	0.030822	-2.89808	-2.37144	-2.38914	-1.17644	-8.61484	6.41016	-1.12746	1.57453	2.24318	1.96796	-1.06437	-2.93834	-2.88676
20	4.42034	0.27794	2.22039	0.803588	1.95775	-1.48807	-2.28504	2.77928										10.3151	-1.19136	-7.17512	-5.80786	-4.32598	-0.09909	-9.22976	-0.6476	-16.2447	6.41016	-1.12746	1.57453	2.24318	1.96796	-1.06437	-2.93834	-2.88676
30	3.39369	2.75202	3.17325	0.646202	1.57883	-1.74329	-2.53396	4.12293										25.2059	-7.00627	-5.17024	-4.14928	-4.69181	-1.00714	-17.9164	-1.39446	-18.971	10.5829	-0.57021	2.29721	4.96632	3.2104	0.354346	0.75062	-2.33762
40	1.03629	-127.293	3.47306	0.375865	0.647498	-5.09962	-36.0869	6.01618										30.7718	-159.306	-54.7256	-11.9879	-141.813	-70.5551	-34.3744	-60.5488	-64.3714	9.18142	0.754028	1.82246	5.47546	1.16362	-0.72569	0.74062	-4.96572
50	-13.405	-228.447	-2.84072	0.457544	-21.9035	-21.9531	-157.579	-2.92314										-7.67057	-238.286	-104.609	-18.3914	-181.329	-81.2782	-45.2479	-104.427	-87.9983	-32.4105	-1.96075	-3.25597	8.15252	-71.7707	-34.6537	-32.3144	-53.9511
60	-47.177	-233.236	-27.4643	0.211109	-63.751	-49.4964	-290.348	-35.1812										-55.1976	-231.992	-88.2674	-22.2516	-151.352	-72.3155	-54.5879	-110.957	-85.5076	-101.934	-36.7074	-12.0532	2.11836	-90.5661	-53.2519	-54.3266	-74.2506
70	-91.3773	-168.625	-61.8698	-0.76895	-121.459	-93.6533	-337.056	-64.9866										-84.6306	-190.744	-61.2288	-25.4896	-117.753	-56.7154	-55.3271	-104.714	-70.3259	-147.526	-99.0522	-20.2597	-19.2418	-119.028	-53.6731	-58.5454	-67.8058
80	-112.484	-115.802	-85.282	-4.92234	-182.017	-120.802	-329.981	-74.9042										-88.8856	-144.366	-42.9095	-19.8767	-89.4512	-40.5805	-48.9111	-96.8022	-53.7908	-166.949	-140.121	-26.3597	-34.8115	-82.8358	-49.5385	-51.1822	-58.3428
90	-111.889	-85.438	-86.3716	-8.77942	-223.632	-134.254	-287.201	-69.5578										-86.7141	-104.898	-26.1436	-14.0658	-61.8247	-25.4475	-47.919	-81.0649	-39.6115	-159.392	-150.864	-28.0208	-40.3459	-64.2077	-42.7692	-37.0622	-48.0476
100	-102.451	-60.5445	-79.3376	-20.966	-249.267	-133.496	-228.962	-58.4947										-64.753	-70.9424	-17.3693	-8.09832	-41.6403	-13.7115	-44.5987	-67.3301	-12.8507	-141.01	-139.775	-29.0006	-39.2039	-49.7183	-34.8047	-23.5815	-39.8497
110	-92.1404	-42.8592	-71.1289	-29.0939	-261.289	-122.562	-174.594	-49.7698										-76.9966	-45.6624	-10.6446	3.66517	-28.3273	-6.49389	-28.3473	-52.7198	-1.64092	-121.601	-122.774	-29.8309	-34.2809	-39.1188	-33.914	-17.5917	-29.8778
120	-81.6276	-36.9632	-65.7735	-38.0805	-263.084	-108.942	-130.043	-37.7741										-74.9084	-29.6653	-2.09844	9.14207	-19.5054	-3.20865	-21.4345	-41.9285	3.43578	-99.7125	-105.359	-27.3845	-27.3278	-32.6622	-24.8678	-15.2252	-23.2929
130	-69.1611	-53.8224	-57.7743	-51.4098	-256.445	-93.5573	-94.4203	-25.2624										-59.8939	-21.6694	0.593568	11.9354	-13.8552	-0.80245	-13.5815	-32.0343	5.25008	-78.4081	-82.7217	-29.1972	-19.4699	-24.6829	-24.6679	-10.9157	-22.4895
140	-57.8578	-30.0857	-51.0819	-127.704	-243.24	-74.9136	-69.2673	-18.2769										-36.4785	-14.5454	1.47734	8.83807	-11.9279	0.486244	-11.4697	-23.4186	6.45436	-62.5191	-65.8466	-28.6204	-12.2319	-19.2541	-24.3481	-4.37828	-18.6405

## Sheet: Sup 3 C
Control																				DatiCre Ntn1 cKO
95.8	179.4	187.4	362.5	437.6	142.2	296.6	156.9													160.5	464.5	369.9	164.2	243.5	151.4	164.2	374.1	222.2	329.2	340.7	181.3	260	355.8	272.8	112.3	278.3

## Sheet: Sup 3 D
	Control																	sgNtn1
10	-14.045	-19.4283	36.4478	24.4804	0.295472	-13.3637	-11.7292	-7.74844										-15.0532	2.11471	-2.83686	-8.50436	-12.3884	-11.2817	-14.5574	-29.7574	8.18758	-10.1004	-4.59608	-2.38837	-11.6114	-3.71214	-5.8843	55.7495	0.806533
20	-3.20157	-23.7735	42.421	23.4944	10.1703	-7.28628	-6.44091	-8.14828										-14.7791	16.561	-1.22432	-4.23712	-0.44111	8.94345	-11.8951	-26.005	3.1243	-5.70555	-6.69128	-10.6793	-10.9206	11.1646	-4.35652	49.2591	4.87283
30	76.3295	17.2849	88.3113	133.733	189.605	27.2569	159.946	37.444										37.1119	303.904	160.618	80.8261	164.747	125.015	17.6192	126.657	109.793	174.104	91.5273	4.76103	130.804	241.876	87.0932	133.629	121.52
40	68.5046	85.8549	146.695	230.483	302.444	53.2944	258.984	96.1128										78.1242	433.311	293.306	135.969	227.168	132.35	73.9303	262.408	184.426	287.627	224.686	30.9109	200.463	326.882	90.5973	258.519	204.836
50	46.2813	145.391	201.049	305.473	385.469	83.8803	260.587	128.612										117.423	442.741	347.14	148.859	234.8	112.904	123.77	318.616	214.834	311.157	309.23	75.5631	223.703	333.163	65.5776	309.189	255.318
60	31.4856	157.39	223.716	350.293	421.087	109.675	217.761	133.234										136.587	395.22	333.872	144.642	211.635	91.9767	139.259	307.982	215.646	280.657	323.643	116.939	221.897	303.183	42.2355	313.021	263.175
70	21.0287	128.628	227.314	348.107	427.296	119.249	164.092	121.114										131.763	331.712	302.692	128.352	182.648	74.6354	135.592	264.208	202.487	235.843	310.09	147.816	200.838	260.317	26.5586	281.507	240.938
80	12.0552	88.5054	216.111	313.706	416.87	114.939	116.406	103.941										116.499	271.756	255.321	109.269	150.736	57.1496	120.613	211.999	188.457	189.204	273.366	160.077	176.195	214.307	18.2612	250.161	191.991
90	8.18575	51.999	206.492	280.255	394.567	103.49	74.4299	83.2938										91.8908	213.575	205.644	90.0661	115.954	42.6695	108.528	163.347	178.91	148.526	233.727	165.986	153.024	172.873	9.31142	189.663	140.942
100	1.22863	24.4719	183.312	243.628	372.999	82.6644	45.5844	65.2858										67.3668	161.237	161.88	71.4027	91.5704	28.5946	91.5889	124.122	122.909	107.408	188.612	164.09	118.842	133.074	-2.55846	146.306	101.701
110	-5.74885	7.33148	163.927	211.586	346.774	64.8069	25.8062	45.6266										40.9133	126.603	126.452	53.853	70.9051	15.0351	77.29	89.5252	28.0596	72.7599	146.444	145.391	93.182	98.9869	-13.1003	114.097	69.7916
120	-9.49691	-4.60066	144.496	180.782	310.235	42.9694	6.67269	31.6316										21.9972	108.007	98.5641	43.1047	56.1613	3.74879	56.8878	61.4113	3.92984	48.2653	103.431	127.271	71.8613	74.7953	-20.8232	92.6112	47.3159
130	-15.3135	-13.5862	115.164	143.025	266.383	30.4416	5.36321	21.5112										5.8295	88.9402	78.389	31.0926	42.3201	-4.33499	47.5451	42.2225	-4.54222	31.1731	66.5258	106.972	55.881	59.202	-25.791	73.5797	27.8638
140	-23.3428	-22.7866	90.5408	106.125	214.868	18.1664	7.46007	11.6877										-4.5982	73.714	64.4522	23.748	34.8056	-11.948	33.4969	24.356	-9.73968	19.4202	40.6496	83.7372	52.7918	46.0732	-26.0296	64.6224	17.3338
