# Supplementary material for: Netrin-1 regulates the balance of synaptic glutamate signaling in the adult ventral tegmental area
Source: eLife. 2023 Mar 17;12:e83760. doi: 10.7554/eLife.83760 (PMC10023152; doi:10.7554/eLife.83760)
Supplement: Figure 4—figure supplement 1—source data 1. [file elife-83760-fig4-figsupp1-data1.xlsx]

## Sheet: Fig 4 Sup A Night
	Control																														Ntn1 cKO DATIRESCre
Night 1	15714	11250	14610	18063	6433	23044	11317	5509	14318	11351	15515	10026	18944	12613	8033	9734	10088	10128	14341	7177	13310										7558	7321	8221	13333	14299	7855	7503	12822	11304	15369	10826	16396	14781	15306	12217	24049	16678	9749
Night 2	12332	6683	10835	13399	5565	16604	12866	9564	7612	11466	13326	12533	16507	10677	8305	11818	11591	8015	14615	6459	6446										4558	9248	8241	15323	10781	5583	6523	9352	10965	10155	8870	12169	9621	11795	9547	11491	15287	9387
Night 3	13251	7726	9326	13200	5715	12242	10944	6940	11021	10091	10815	10640	11770	8670	8123	11824	13470	9457	14533	8330	7949										4995	10762	7881	12381	11994	5879	7611	8762	11567	10786	8146	8626	12900	11458	9225	10687	11773	14578
Control																					Ntn1 cKO DATIRESCre
13765.7	8553	11590.3	14887.3	5904.33	17296.7	11709	7337.67	10983.7	10969.3	13218.7	11066.3	15740.3	10653.3	8153.67	11125.3	11716.3	9200	14496.3	7322	9235	5703.67	9110.33	8114.33	13679	12358	6439	7212.33	10312	11278.7	12103.3	9280.67	12397	12434	12853	10329.7	15409	14579.3	11238

## Sheet: Fig 4 Sup A Day
	Control																														Ntn1 cKO DATIRESCre
Day 1	1561	3161	1605	4294	983	2744	1614	2091	3295	2531	3544	1879	2431	4116	1714	1879	1354	1836	3953	1143	2634										1769	918	1244	2427	1951	1625	1629	2655	1609	2773	1810	2105	1614	1276	2057	2273	1649	3183
Day 2	1621	1815	1833	2813	1072	2228	1535	1378	2401	1471	2462	2083	1546	1443	1802	1520	1132	2120	3840	1659	3155										1177	1230	1228	2444	2482	1063	1744	2577	1784	2154	1344	1910	1799	1883	1460	1816	1282	4080
Control																					Ntn1 cKO DATIRESCre
1591	2488	1719	3553.5	1027.5	2486	1574.5	1734.5	2848	2001	3003	1981	1988.5	2779.5	1758	1699.5	1243	1978	3896.5	1401	2894.5	1473	1074	1236	2435.5	2216.5	1344	1686.5	2616	1696.5	2463.5	1577	2007.5	1706.5	1579.5	1758.5	2044.5	1465.5	3631.5

## Sheet: Fig 4 Sup B
Control																			Ntn1 cKO
5451.95	3966.43	11192.4	3399.01	3985.04	2222.19	2170.66	3724.61	3511.99	4183.94	3558.8	2714.27	2860.01	1861.26	3812.32	2175.71	2261.8	3507.95	5065.09	6019.3	2200.55	3743.32	4410.32	4142.56	3916.18	3346.54	2909.03	3988.22	3578.55	3402.47	3268.26	4592.15	3458.9	5531.3

## Sheet: Fig 4 Sup C
Control																														Ntn1 cKO DATIRESCre
20.84	21.56	17.7	15.54	19.48	20.2	20.9	19	22.2	21.8	25.48	24.59	24.92	26.86	23.44	22.41	21.79	23	23.8	19.1	18.3	18.9									22.9	23.4	20.3	21.3	19.4	23.7	23.93	21	19.78	20.06	20.7	20.9	20	16.9	16	16.9	16.6	19.35	19.54	19.05
[truncated: 2 more columns]

## Sheet: Fig 4 Sup D
Control																											Ntn1 cKO
158	106	85	244	67	89	94	102	82	111	149	107	115	130	95	88	101	124	163									141	131	103	56	82	81	183	101	121	111	139	101	152	100	120
