# Supplementary material for: Netrin-1 regulates the balance of synaptic glutamate signaling in the adult ventral tegmental area
Source: eLife. 2023 Mar 17;12:e83760. doi: 10.7554/eLife.83760 (PMC10023152; doi:10.7554/eLife.83760)
Supplement: Figure 4—source data 1. [file elife-83760-fig4-data1.xlsx]

## Sheet: Fig 4 B
		Control																					DATIRES Cre sgNtn1																					sgNtn1
4:30		470	476.5	357.5	732	182.67	384.67	853.5	882	6	506	415	376.17	353	2	486.33	160	321.68	286	322	597.52	297.5	687.5	391.5	613	866.13	228	123	153.5	425.33	191	452	463.83	529	12	455.33	467.5
4:45 PM		539	496.5	119.5	611	17	293.17	773.5	713.67	42.5	252.17	577.5	691.25	301.67	180.5	435	9.5	224.58	120.5	387.5	834.4	319	245.5	372.33	444.83	317.17	639.5	35	136	349.83	384	387.5	239	409.17	1	438.48	401.5
5:00 PM		430	304	20	296	0	336.08	335	594	64	148.17	481.5	231.33	386	29	55.5	0	0	36	439	561.12	151	365.5	383.5	352	502.67	512	34	16	301	222.33	316.5	395	165.5	107.5	466.75	296.5
5:15 PM		473	621	111	185	1	22.5	469	548.67	22	4	422.5	25	309.5	5	0	5	32.67	5	325	27	164	147.5	194.5	423	449	338.17	6	109	308	331	200.5	76	40.5	339	240.33	260
5:30 PM		272	249.5	134	0	14	0	430	483.83	143	41.33	549.5	0	429.5	170.5	7	4	5	0.5	533	320.02	8.5	42	229.5	333.5	723	418.5	6	156	414.5	185	39	106.5	133.5	21	55	31.5
5:45 PM		227	118	9	94	31	21	522	329.33	4.5	730.42	432	2	209	109.5	87	0	76.83	0	236	5.5	2.5	200.5	40	194.17	449.17	6.5	4	96	183	18	3.5	67.5	10	4.5	0	1
6:00 PM		0	144	16	3	253.33	254.17	428	452.17	21	161.67	370	0	426	41.5	0.5	2.5	70.43	94	341	22.25	0	20.5	51.5	34	443.83	17.5	2	15.5	0	2	0	0	102	2	33	2
6:15 PM		20	0	39	236.5	160.67	11	78	471.33	18	74	239.5	454.08	8	0	121.5	183	72.67	11.5	21	938.23	1	1	71	2.5	108	65.5	87.33	4	0	151	27.5	70	1	49	408.5	370.17
6:30 PM		365	252.5	16	425	232.33	5.5	9	321.5	106.67	280	0	324	160	64	324	149	9	89	12	606.14	128	141	0.5	60	28.5	22.5	149	105	252.5	147.67	177.5	48	20	30.5	395.42	233.5
6:45 PM		526.5	575	152	518.5	73	363.33	19	472.67	181.17	612	143.5	692	241	245	542.5	61	164.93	17	1.5	1051.18	3	278.5	128.5	6	249	279	17	172	415.5	63.5	17.5	55	107	5	419.92	32
7:00 PM		432	546	68	543	547.17	331	382.5	399.67	854.08	558.33	596	226	559	344.5	425.67	20.5	393.43	143.5	311.5	213	0	301.5	189.5	193.5	475	385.5	61	273.5	513.5	256.5	187	443	55	215	388.05	198.92
7:15 PM		305	476	257.67	620	663.33	43	137.5	357.17	443.5	443.5	651	798.33	595	449.67	522.5	164.5	400.65	353	288	256.22	108	280.5	143	367	608.17	700.5	98	298	410.5	387	270	372.5	439.5	394.5	502.93	658.67
7:30 PM		404	591	52	487	608.67	40	0	197.5	587	424.17	470	745.5	505.33	416	561	268	470.57	250.5	393.5	1118.32	489.5	344	272.5	337	487.83	521	197	416	347.83	400.33	382.5	487.5	610.5	787.5	659.6	463.83
7:45 PM		334	555	49	417	432.5	338.83	392	3	482.5	260.83	599.5	410	460	190.5	467	201	375.52	306.5	464.5	616.95	466.5	254	347.5	270.5	425.67	682	243	181.5	475	362.17	678	484.5	645.33	879.17	850.12	430.5
8:00 PM		349.5	746	77	423	663.17	313.33	608	362.33	591.5	776.5	712.5	795.67	450.5	367.17	456.33	198	585.08	362.5	286	547.93	167	457.5	374.5	305.5	484.33	532.5	124	194.5	384.33	466	328.5	353.5	662.5	791	621.17	376
8:15 PM		601	691	290	576	380.83	230.92	525	270.5	459.33	561	599.5	536.5	432	2	519.83	343	447.28	412	414	38.92	431	383.5	239	187	405.67	735.67	253.67	8.5	421.33	400.5	564.5	671.67	575	980	542.5	621.17
8:30 PM		379	450	97.5	519.5	493.83	55.67	549	424.33	352.17	596.67	661.5	507.67	512.17	231.5	492.5	481	601.47	629.5	267	571.65	275.5	393.17	233	329	201.5	475.5	249	479	382	350	503	366.5	888	501	476.67	369.83
8:45 PM		361	692.5	196.5	610.5	342.17	13	476	293	241	265.17	820	230	426.5	413.5	318.5	241.5	409.68	377.5	425	661.2	399.5	540	245.5	178	593.83	582	215	303.5	470	604.67	609.5	188	776	807.5	642.47	453.5
9:00 PM		436.5	552	325	672	815.67	120	460	428.83	18	518.33	447	2	418.17	480.67	599.67	274	386.25	405	375	849.83	271	87.5	224	413	531.67	597.5	281.33	165	544.33	390.33	353	511.67	799.5	577.5	443.17	291.5
9:15 PM		362	491	216	681	573.67	98	473	575.17	14	203	653	0	467.33	331	641.17	277	614.78	321	274	1176.12	161	132.5	99.5	153	472.17	541.67	315.5	283	371	335	701.17	264.67	594.5	546	23	69
9:30 PM		446.5	619.17	220.5	632	714.33	359.17	497	459.17	301.17	886.33	649.5	117	566	184	487	238.5	328.95	546.5	374	814.55	181	79	10	70.5	81.5	561.5	266	502	542	363	643.5	468	607	290	45.33	238
9:45 PM		319	572	284	629	538	426.5	452	521.17	128.5	735.67	653.5	9	592	0	151.5	66	507.48	276.5	265	434.1	195	511	10.5	200.5	25	569.5	354	251.5	458	539	594.5	474.83	691	422.5	2	649.5
10:00 PM		404	479	336.5	668	174.67	4.5	391	603.67	58	692.67	616	2.5	448.5	258.67	0	1.5	321.95	373	271	838.4	204	381.67	231.5	245	462	535.5	266	433.5	327.17	466.5	512	291.5	344.5	592	649.83	457.33
10:15 PM		416.5	650	268	624	515	0	388	434.33	5.5	466.83	628	204.5	456	400.67	163.17	196.5	718.58	317	466	870.75	6	366.5	117.5	369.5	633.83	729	264	305	443	262.5	625.5	448.5	669.5	572	717.33	36
10:30 PM		505.5	475	160.5	780	218.67	25	327	392.33	369.83	947.83	567	214	458	396	526	287.5	307.17	414	285.5	806.28	0	155.5	291.5	163.5	568.83	486.5	274.5	12.5	345	616.5	454.5	451.67	819.5	629.5	560.52	2
10:45 PM		435	453	270	643	0.5	269.67	485	502.17	280.83	566.83	655	271.5	290.5	396.5	461	267.5	566.65	292	393.5	1066.72	27.5	380	145.5	218	471.33	409.5	341	20	453.33	155.83	659	254.5	378.67	771	585.05	437.33
11:00 PM		526	572	99	694	3.5	141.5	366	259	19	443.5	670	527.17	428.5	161.5	497.33	239.5	237.5	321	334.5	530.77	73.5	193.5	262.5	301	500.33	483	359.17	560	294.17	536.83	419	169	527.5	675.5	644.7	679.67
11:15 PM		400	526	97	663.5	39	227.67	406	552.17	5	75	362	353.17	418	0	632	264.5	691.82	160.5	351.5	1375.03	323.5	341.5	139	373	531	474.5	448	294	289.5	425.5	565	602.67	445	71.5	640.63	439.33
11:30 PM		535	706	56.5	616.5	204	9	389	360	35	424.33	456	241.5	410	367.83	408.67	331	412.93	86.5	399	1084.32	409.5	4	249.5	232.5	701.83	510.5	331.5	267.5	417.33	373.67	512	197.5	452.5	0	417.17	256.83
11:45 PM		471	744	205.5	664	781	20	535.67	388	203.5	109.33	0	378.5	364	533.5	520	163	576.55	0	527	535.88	57	26.5	163.5	100	87.5	561	203.5	115	482.5	131	468	541.83	809.5	37.5	499.17	274
12:00 AM		281.5	642	149.5	923	310.5	226	424	78	390.5	10.5	1	521	393	346	357.17	295.5	196.08	19	370.5	961.98	491	27	231.5	155	8.5	574	300	2	306.17	543.33	402	478	606	348	512.67	527.92
12:15 AM		56	481	60.5	844.5	463.67	23	455	0	350.83	94	2	349	275.5	325	514.67	403.5	480.95	40	277.5	540.95	342	123.5	6	426	298.67	477	410	35	4	293	426	513	420	917	490.67	306.17
12:30 AM		453.5	708	95	820.5	314.67	35.9	431	63.5	368.67	11	2	364.17	405.5	347.5	276.5	106	34.33	61.5	412	2.5	58.5	57	28	130	26	277.5	240.5	298	0	490.67	335.5	179.67	761.5	826.5	438.73	274.67
12:45 AM		385.5	505	58	782	647	344.17	502	257.5	432.67	11	24	135	403	300	477.17	442	0	150.5	141	65.5	405.5	8	10.5	0	35.5	472.5	16	277	70	322.5	604.5	264.83	582	657.67	496.7	413.83
1:00 AM		434.5	500	44	879	288	282.33	473	83.5	317.58	48	464	4	458	550.67	0	214	28.75	318.5	471	367.18	163	23	83	1.5	0.5	350	7	242	184.67	419	455.5	398.5	636.5	476	613.25	285
1:15 AM		414	581	4.5	680	0	93	486.5	349.17	431.33	50.5	666	1.5	313.83	431.5	194.67	4	71.42	594.5	67	1.5	12	13.5	113.67	2.5	23.5	503.67	2	247.5	455.33	336.5	251.5	2.5	519.5	688.67	209.33	260.67
1:30 AM		610.5	343.5	0	916	0	246.5	434.5	218.17	72	34.5	631	40.5	577.5	309.33	443.17	22	7	450	4	2	89	29.5	267.5	2.5	7	180	0	66	309.33	187	471	0	780.5	91	532.2	491
1:45 AM		508	618.5	2.5	752.5	0	28.5	362.5	455	50.5	529.5	697	4.5	97	114	407.5	0	34.17	472.5	9.5	15.5	44.5	100.5	305	71.5	11.5	62	3	6	447.67	262.33	44	0	984	4	335.83	347.17
2:00 AM		546.5	228	27.5	836.5	24	1	438.5	418.5	213.17	341.67	687	12	8	378.5	537.5	13	73.58	389	6.5	126.58	0	253	376.5	0.5	166.5	3	0	9.5	272	28	1	20	802	0	359.5	324
2:15 AM		179.5	23	177	39.5	533	3	564	359.67	59	479	673.5	413.67	10	262	199.5	0	45.83	370	21	0	1	93	293.5	231	405.33	0	0	21.5	276	2.5	2	339.5	607	91.5	275	368
2:30 AM		8.5	0	146.5	32.5	386.33	2.5	623	305.83	151.5	238.5	710.5	414.5	45	314.5	380	27.5	92.28	338.5	10	0	2	129.5	35	267	782	3	57.5	2.5	154	2	2	283	720	587.17	118.67	476.5
2:45 AM		21.5	2	171.5	97	38.5	0	650	303.83	12	84.67	468	372	98	246	436.67	88.5	39.77	225.5	22	2.5	0	257	0	464.5	637	1.5	191.5	5	272	0	0	409.33	961.67	527	336	561.17
3:00 AM		385.5	314.67	63	246	0	5.5	356	67.5	0	0	555	814.17	26	72.5	312.5	345.5	58.33	117.5	29.5	9.5	14.5	125.5	1.5	383	433.5	22.5	234.5	315.5	4	10.5	0	172	763	192	153.17	236.17
3:15 AM		574	586	200.5	811	0	0.5	789.6	201	19	7	672.5	211	1	1.5	14	244.5	378.85	0	135.5	266.35	25.5	20.5	0	170.5	534	10	216.67	218.5	1	5.5	219	43.5	512.5	6.5	0.5	64.5
3:30 AM		545	638	51.5	903	0	5.5	683.08	6.5	32.5	10	556	377.5	50	260.5	17.5	179	291.8	31	4	1108.25	2.5	4	8	256	303.5	7	345.17	180.5	0	35	613	5	130.5	4.5	1	276.5
3:45 AM		333.5	288.5	98.5	457	3.5	93.67	430	0	472.83	8	579	424	36	391.5	1.5	128.67	352.12	15.5	0	581.27	18	35.5	3	273	372.17	9	398	149	21	65.33	384	11.5	757.5	33.5	13	254.17
4:00 AM		520	312.5	198.17	35	259.5	281.67	106.5	4.5	259.17	7	590.5	135	9	267.17	2	401.83	464.2	20.5	24	1249.18	148	78	74	241.5	12.5	14	204.5	48	1	299.33	16	397.5	537.5	418.5	2	2
4:15 AM		62	100.5	54.5	0	101.5	92.5	0	14.5	198	26.5	184	103.5	16	231	114	221.5	327.77	0	0	952.67	196.5	308	153.5	114.5	0	455	375.67	11.5	37	316	4	3	311	182	0	1.5
4:30 AM		1	2.5	201	1	9	0	0	20.5	396.67	500	88.5	1	27	105.5	529.5	10	483.9	18	27.5	984.33	129.5	150.5	123	277	21.5	303	230.17	8	349.83	128.5	9	0.5	0	249.5	1	10
4:45 AM		173.5	252	214.5	2	0	0	23	12.5	168	442.67	523.5	1.5	49	0	565.5	1	265.88	12	274	316.77	513	85	216.5	21	7.5	328	255.5	25	310.5	519.33	5	8.5	4	21.5	23	729.67
5:00 AM		578.5	470.5	206	600	0	100.83	1	38	113	57	291.5	14.5	475	23	540	33	157.42	142.5	264	41.5	167	248	337.5	1	47	375	99	161	361.83	126.5	13	135.17	0	2	342.53	616.33
5:15 AM		236.5	342.5	286.5	737	5	132.17	404.5	18	0	349.33	314	0.5	413	0	476.67	57.5	22.6	205	286.5	2.5	127	55	296.5	14.5	7	207	22.5	139	320.5	186	178	1	0	261.17	349.17	820.83
5:30 AM		77	397	218.5	679	367	268	438	2.5	0	483.83	322.5	303.17	443.67	115.17	554.17	96	2.5	410	351.5	62.83	184	2.5	142.5	117.5	243.5	40.5	0	197	418.5	192	146	13.5	220	410	622.58	527.17
5:45 AM		123	190.5	196	123	204	93	477	389.67	3	44	476.5	507.67	528	343.17	485	271.5	97	216.5	312	43.42	167	4	210	169	615.33	1.5	2	164.5	354	135.5	616	417.5	586	402	300.17	663.5
6:00 AM		117	225.5	324	1	57	84	352.5	208.5	68	382.5	239.5	323	443	359.5	166.5	315	261.53	288.5	396.5	427.28	211.5	5.5	465	353	521.17	0	1.5	40	183	114.33	719	457.83	681	55.5	540.5	529.67
6:15 AM		0	336	17	88.5	0	6.5	242.5	440.5	476.83	220	6	546	398	180.5	1	197	440.28	367.5	269.5	2	385	9	238.5	74	466.17	4	0	8.5	485.33	252.5	497	244.17	779	295	389.98	662
6:30 AM		169.5	253.5	0	618.5	0	44.5	128	276	325.17	12	0	181	377	382.83	38	244	551.02	44.5	266.5	17.67	124	131	102	2	27.5	284	88	6.5	356.83	223.83	543	447.83	464	149	250.22	530.17
6:45 AM		8	13	4.5	187	2	156.17	2	187.5	540.75	24	0	637.83	284.5	198.17	579.67	251	473.87	4.5	276	132.43	77.5	479	0	0	2.5	360.5	257.17	129	273.5	10	343.5	230.67	754	33.5	172	204.5
7:00 AM		6	0.5	66	0	1	248.5	131	170	353.17	15	4	662.67	511	2	573.33	166.5	30.83	54.5	31.5	622.38	27	218	51	21.5	61.5	121	421.5	315	240	5	265.5	5.5	654	113.5	161	51.5
7:15 AM		10	0	0.5	0	55.17	168	538	334.5	329.42	31	16	446.5	163.5	0	220	13	0	17	29.5	38	0.5	10	0	2.5	84	1.5	43.5	14	15	2	38	2.5	528	1	40	6.5
7:30 AM		0	191	0	76	115.5	5	40	272	7.5	24.5	0	29.5	79.5	63	3	32	55	1	0	3	0.5	7.5	0	0	13.5	0	4	5.5	0	34.5	4	92	223	2	2	0
7:45 AM		1.5	306	0	3.5	10	9.5	7	264.5	0.5	3	102.5	6.5	0	20	0	1.5	9.17	23.5	6	1	0	11	2	0	2	18	2	22.5	0	0.5	0	3.5	26	33	3	287
8:00 AM		166	3.5	0	1	0	9.5	0	117.17	0	31	136.5	11	0	0	0	54.5	40.92	27.5	18	54.25	2	17	1	1	10.5	0	5	121	39	0	6	3	5	2	0	58.5
8:15 AM		32	0.5	4	6	0	6	0	317	0	201.78	0	258.17	2	0	1	81.5	7	17.5	10	210.53	0	6.5	1	0	25	0	21	2	9	3	11	5.5	0	7	3	3
8:30 AM		0	2	100.5	146.5	2	1	0	5	1.5	364.58	0	42	5.5	156.67	27	125	0	2.5	29	77	3	9	0	12	4	3	36.33	8.5	0	39.67	4.5	51.5	0	2	298.67	2.5
8:45 AM		1	3	30	251	60	59	31	3	61.17	21	0	2.5	0	313.67	289.5	20	65.85	65	89.5	12	0	29.5	77	178.5	41.5	1	0	5	3	111.17	3.5	372.5	86	0	11	0
9:00 AM		1	231	0	8	0	157	0	5.5	0	2.5	0	0	215.67	270	6	19	0	0	155	68.46	85	7.5	56	0	0	0	5	1	54	87.17	8	193.5	227	70	0	2.5
9:15 AM		0	448.67	0	0	0	2	25.5	198.67	5.5	4	0	4.5	90.5	265.83	0	15	0	0	130	30.21	0.5	6	1	0.5	2.5	32.5	33	2.5	281.67	55	1.5	8.5	7	33.5	0	245
9:30 AM		210	323.5	2	0	7	0	3	211.5	0	15	28	0	2	8	95.5	0	29.17	0	15.5	2	0	11.5	0	0	143.5	361	45	38	174.83	40	43.5	4.5	0	2.5	2.5	171
9:45 AM		171.5	19.5	0	56	1	0	0	0	3.5	7.5	92.5	1.5	59	1	116.67	4	240.17	24	23.5	0	4.5	36	0	0	406.67	34	7	112.5	106.17	21.5	147	0.5	0	0	0	32
10:00 AM		10.5	0	3.5	241	64.5	0.5	1	3	39	253.5	4	13	0	0	0	5	434.67	153	0.5	274.8	4	190	27.5	3	46.5	2	2	0.5	0	2	161.5	6	0	23.5	6	0
10:15 AM		1	1	16	2.5	13.5	58.17	236	4.5	10	552	3	210	1	11	0	65.5	137.75	45	22	160.42	0	25	148	7.5	5	0	0	0	1	9.5	53.5	30	0	80	7.5	107
10:30 AM		0	3	17.5	0	1	132.17	53	4	0	3	0	283	57	85.5	4.5	165.5	0	2	7.5	25.5	53	5.5	37	0.5	8	1.5	12	0	0	14.5	0	1	18	5.5	172.33	127.83
10:45 AM		72	429.5	5	1	10	266.17	0	10.5	2.5	17.5	1.5	3	43	66.17	38.5	10	0	6	12.5	1	169	3.5	0	0	33	5	51.5	14.5	0	16.5	3.5	4	7	4	119.5	14
11:00 AM		0	205.5	2	0	80.5	21.5	1	111.5	39	18.5	1.5	1	3	4	0	3	20.08	24	97	0	6	34.5	0	1	0.5	5.5	256.67	6	33	74.33	5.5	0	0	0	1	3
11:15 AM		71	4	0	1	144.17	9	34.5	268.5	16.5	94.5	152	1	3	66.5	0	7	30.1	5	131.5	196.55	10	132.5	0	155	60	32.5	105.5	55.5	215.67	103	0	5	0	4.5	2	1.5
11:30 AM		0	2	4	238	112	2	0.5	2	0	71	279.5	1	0	7.5	0	2	134.08	156.5	5.5	113.92	0	77.5	4.5	86.5	38	244	13	10.5	10	89	7	268.5	0	0	6	9.5
11:45 AM		0	1	41	183	16	0	1	0	1	14	124.5	7	0	2	0	0	0	137	1	56.08	2	9	6.5	1.5	5.5	152.5	0	7	0	73.5	0.5	200	0	103	4	16
12:00 PM		42	0	191	2	2.5	4	1	6	3	21.5	84.5	3	5	0.5	0	1	0	9	6	0	0.5	6	71.5	0.5	34.83	2	0	5	3	27	32	15.5	68	100.5	4.5	6
12:15 PM		37.5	17.5	23	0	0	1	4	169.5	0	9	0	5.5	2.5	21.5	0	9	88.98	22	4	3	1.5	14	0	0	2	0	0	3.5	0	1.5	2.5	3.5	149.5	166.5	0	159
12:30 PM		0	143.5	0	0	0	135.33	111	50	0	39	2	2.5	186	0	142.5	136.5	23.42	0	4	193.57	1	16	0	21	2	0	34.5	4	27	12	0	0	25	4.5	47.5	5.5
12:45 PM		19.5	171	7	0	2	216.5	1	0	5	372.33	0	1.5	37.5	0	188.5	68.5	0	25	28	358.6	154.67	30	0	8	0	0.5	190.83	16	0	61	18.5	52.5	0	1.5	0	0
1:00 PM		23	8	37	128	1	3	2.5	0	139.17	79.17	4	1	4	1	0	7	72.75	2	95	63.92	76.5	14	51	10.5	104.5	10.5	37	188.5	1	87.5	129.5	9.5	0	24.5	2	3.5
1:15 PM		98.5	37	20	39	0	0	5.5	12.5	159.83	21	1	71	0	11	0	5	0	1	15	5	0	53	3	3	238.5	69	0	116.5	0	13.5	20.5	2.5	0	100	3	4.5
1:30 PM		0	109	52	1	91	0	129.5	118.17	1	12.5	0	282.33	13.5	163.5	42.5	7.5	42.17	37.5	0	4	0	12	0	1	66	0	9	21.5	17	3	0	49.5	0	7	232	4.5
1:45 PM		0	0	1	1	105.5	1.5	6.5	0	0	13	40	15.5	0	5	2.5	1.5	7.5	7	0	2	0	1	1	1	17	3.5	0	3.5	164	5	0	0	2	3	361.67	225.5
2:00 PM		14.5	26.5	0	2	0	0	0	1.5	0	70.67	16	9	0	3	0	19	0	1	4	0	1.5	167	1	84	3	0.5	6	11.5	302	24.5	6.5	34	2	2	40.5	88.5
2:15 PM		209	401.5	283	344.5	0	86	0	9.5	24	6.5	0	3	7	3	2.5	46	0	3.5	1.5	29.25	25	52.5	2	123	4.5	1.5	2	85	18	93.5	2	7	108	1.5	8	22
2:30 PM		23.33	186.5	54	394	0	0	0	222.5	0	8.5	3	4	0	1	0	126	0	67	54.83	31	88.5	110.5	95.5	117.5	24.5	7	4	107.5	5	7.5	11	4.5	29	0.5	4	2
2:45 PM		47	2	5	18	10.5	0	2.5	3.5	0	5.5	1.5	0	9	5	44.5	1	0	49	41	2	18.5	11	142.5	28	9	0	0	28	0	3.5	34.5	19	0	39.5	0	5
3:00 PM		0	15.5	0	0	15.5	0	2.5	0	0	3	0.5	0	1	9	60.5	1	28.67	50	2	4	0	1	2	10	20	0	2	5	1	10	16	13.5	4	158.83	3.5	5
3:15 PM		3.5	0	0	0	2.5	0	1	4	0	6	2.5	1.5	4	9	1	4	1	2	14	3	3	3.5	0	2	0	2.5	7.5	9	3	12	138.5	12	9	201	1.5	35
3:30 PM		28.5	92.5	0	2	20	0	60.5	0	0	23	1.5	5	11.5	0	0	1	20.75	8	14	27.5	3	3.5	81	6	7	14	71	0	5	8.5	0	158	0	29	21.5	5.5
3:45 PM		0	62	0	16.5	0	0	131.5	34	24.33	5	208	3	3.5	2	0	0	153.67	62.5	62	47.93	16.5	56	51	16	25	2	98	12	40	9.5	0	263.67	1	2	70	6
4:00 PM		0	62.5	37	2.5	11	0	12.5	10	1	52	431	67.5	6.5	7.5	0	63	544.17	21.5	48.5	20.5	47.5	148	2	61	2	11.5	0	81.5	280	7	0	56.5	8	3	6.5	8.5
4:15 PM		34	359	7	1	107.5	10.5	0	0	0	111.17	210.5	242.67	120.17	0.5	0	121	223.33	0	4	0	150	1.5	0	1	12	52.5	0	8	148	11.5	0	8	74.33	0	2	29
4:30 PM		0	336.17	0	43	274	1	2	3	0	161.5	138	147	398.67	2	2	59	19.5	21	7.5	24.33	19.5	7	0	1	8	195	4.5	6	3	1.5	2	4.5	0	2.5	6.5	87
4:45 PM		1.5	5	0	17.5	21.5	7.5	0	14.5	158.17	8	27	25	300.5	3	4	22	0	0	10	545.73	0.5	3.5	37	1	90.5	19	25.5	9.5	0	72	1	1	0	15	2.5	116
5:00 PM		35.5	17	18	0	0	168.17	2.5	46	21.5	2	3	4	11	225.83	0	2.5	0	7	33	740	1	4	0	22	4.5	4	12.5	4	2	138.5	4	8	0	38.5	12	89
5:15 PM		231.5	4.5	29	0	1.5	92	0	156.5	0	9	1	2	2	233.5	0	13.5	26.67	20	188	599.25	20.5	6	1	3.5	0	0	17.5	18	3	101.5	6	0.5	6	55.5	9	15
5:30 PM		108.5	24.5	16	18.5	17	0	24	1	0	54	0	6.5	8	18	16	11	3	240.5	156	771.8	96.5	120.5	1	8	0	4.5	3.5	12	37	19	5	4.5	70.17	22	0	5.5
5:45 PM		28	363	0	4	25.5	1	97.5	0	0	9	78.5	92.5	45	0	296	3	208.55	16	195.5	800.07	15.5	68.5	24	227	52	0	1	35.5	224	2.5	35	34.5	10	0	30	4
6:00 PM		31.5	275.5	3	5	20.5	1	43	1.5	0	39	215.5	652.83	313	1.5	521.5	132.5	69.33	20	202.5	183.12	4.5	20	1	52.5	1	4.5	0	17.5	352.67	10	117	5	6	1.5	370.67	2.5
6:15 PM		10	0	10.5	264	6	0	3	9.5	28	87.5	293	165	339.5	38.5	418.17	36.5	2	11.5	9	41.5	4	14	4.5	1	22.5	471	13.5	81	139	8	21	21.5	17.5	55.5	538.67	124.67
6:30 PM		35	73	4.5	412	400.17	196	1	179	119	348	89.5	96	297	530	297	5	0	13	0	1	70.33	4.5	15	13.5	469.17	278.5	148.67	39	0	75.83	1	12	0	128	558.5	67.5
6:45 PM		297	614.67	111	589	449	93.83	6	186.5	311.17	423.67	471	183.5	54	327.17	280.5	72	1.5	77	1	28.12	86	45	4.5	84.5	447.83	34.5	0	74	1	110	0	171.17	32.5	133.5	9	7.5
7:00 PM		418.5	573	297.5	642.5	565.5	275.83	32.5	2	902.5	173.5	440	466	224	571.17	457.17	174	71.42	180	50.5	324.78	246	138.5	26	29.5	810.17	119.5	37	317	161	219.83	188.5	113.17	464	19	0	418.33
7:15 PM		500	626	129	684.5	633.17	104.5	353.5	24	707.17	167	728	431.67	334.5	481.17	383.67	72	64.33	294.5	213.5	971.26	184.5	260	371	101.5	493	508.5	403.5	463.5	395.17	437.5	351.5	476	427.5	464	267.83	460.92
7:30 PM		552.5	610	261.5	684	747	210.67	503	46.5	557.17	16	502	201	314	619	436.17	314	457.78	355	97	829.67	382.5	71	382	510.5	704.33	528.5	311.67	184	324.67	139	495	560.67	469	525	735	604
7:45 PM		404.5	505	415	753.5	620.67	205.67	372	38	837.17	337.5	637	535.5	381	474.67	469.67	350	305.18	288.5	201.5	745.63	318	340.5	229	475.5	719.5	550.5	201.5	410	369	612	313	291	71	654.67	543.92	601.17
8:00 PM		541	558	123.5	729.5	499.83	440.67	402.5	246.67	475.5	250.33	488	831.5	195.5	419.83	372.17	201	549.62	472	338.5	651.16	156	212	386	283.5	862.83	456.5	186	204.5	291.33	379.67	476	277.5	230	742.5	542.6	312.5
8:15 PM		497	697	215	802	571	598.83	407.5	325.5	583	264.17	439	702	385.5	549.83	418	416	663.02	449	212	1113.76	355	17.5	336	512.5	618.83	484	237.5	254	453.67	424	452	287.5	129	516.67	609.87	609.5
8:30 PM		596	527	95.5	684	841.17	371.5	446	154	556	314	399	510	322.83	412.67	279.5	405	497.23	458	206	505.93	210	230.5	372	245.5	463.17	575.5	280	61.5	182	521.83	502.5	334	428	804.5	477.67	452.17
8:45 PM		394	509	208	780	292.67	100	374	252.5	213.5	180	680	443.67	288.33	444	13	331.5	912.9	522.5	242.5	916.32	386	296.5	452.5	346	735.17	399.5	96	13	387	177	383.5	583.5	593	400	450.68	270
9:00 PM		187.5	464	286.17	757.5	882.67	444.83	339	242.5	621.17	165	666	381.5	296	649.5	5.5	326.5	304.85	439.5	400.5	889.73	260	242	174.5	603.5	25	467.5	1.5	18	251.67	394.5	455	219	515	649.5	551.75	125.5
9:15 PM		328.5	526	139	756.5	599.83	258.5	351	317.5	516	10	588	191.5	85	357.17	204	347.5	797.05	644	397.5	839.87	225	158	489.5	451.5	6	460.5	34.83	217.5	334.17	496.33	404	456.5	273	513	366.7	48.5
9:30 PM		368	462	135	633	565.67	78.5	325	127	520.5	30.5	647	177.67	99	411.83	448.5	148	388.43	642	237.5	1073.8	378.5	276.5	329.5	357	52.67	401.17	205	277.5	277.33	184.5	512	13	109	429.5	433.17	2
9:45 PM		422	479.5	54.5	807	624.67	5.5	312	209.5	334	249.83	487	478.5	268.67	206.17	535.17	143.5	699.7	517.5	354.5	1004.78	70	24	186	179	441.83	541	222.67	320	191.5	582.17	294	133	52	628	86.83	2
10:00 PM		347	588.5	13	800	406	9.5	552	341.17	366.5	315.67	500	233.5	115.67	406.33	321.67	237.5	830.08	457.5	298.5	838.37	409.5	30	245	246	793	348.5	142.5	202.5	343	535.67	743	383.47	362.5	1126	15	36.5
10:15 PM		7	363	320.5	544	744.83	143.33	449	117.5	176	326.83	724	1	274.67	262	359	343	415.95	372.5	423	485.47	155.5	2	15	5.5	700.58	362	111	315.5	228.67	190	180	458.08	295	1279.33	115.83	391
10:30 PM		233.5	414	208	712	384.83	279.5	165	2	469.5	163	586	1	298.33	390.5	334.5	149.5	613.62	566.5	197	1049.55	130.5	83.5	0	56.5	535.67	359	33.5	303	272	457.17	641	146.17	601.5	563	433.33	516.83
10:45 PM		723.5	402	203.67	708	431	827.83	471.5	0	536	222.17	647	0	266	220	319	209	649.38	332	352.5	868.05	275	6	45.5	46.5	785.67	593	90.5	403.5	289.67	496.5	214.5	242.67	226	296	257.33	436.42
11:00 PM		337.5	63	273	545	371.17	3.5	527.5	372.83	477.17	305.5	664.5	2	285.5	30	443.5	283	678.37	199	177.5	846.7	228	209	66.5	3	704.17	478	4	134	166	284.5	0	139.29	9	105	243.4	225.5
11:15 PM		393.5	68	102	583.5	5	633.67	623.5	359	57.5	35	621.5	15.5	210.5	3	425.67	241	244.97	676	421	203.05	130	110	743.5	6	100	395.5	8	144	217.5	593.67	0	3.63	127.33	444	268.5	472.33
11:30 PM		586	455.5	329.5	663	1	800.17	266.5	446	289	276.83	387	374.5	127	307.67	118	2	800.88	432.5	414	858.33	104.5	102	366.5	142	47	271	2	29	375.67	363.67	59.5	224.37	288.5	707.5	541	368.17
11:45 PM		158.5	392.5	75	603.5	36	433.17	35.5	122	30	133.67	423	512	118.5	589	2	124	776.2	61.5	349	238.32	177.5	28.5	372	103	10	2	20.5	10.5	229.67	281.83	209	220.55	213.5	131	270.83	154
12:00 AM		0	359	139	10.5	495.67	424	461	341.17	0	0	30	297	2	213	141	25	303.53	21	273	757.68	29.5	291.5	208	444.83	69	2	250.5	4.5	135.17	540.67	466	248.67	465.5	44.5	169.5	134
12:15 AM		18.5	337.5	52	441.5	585.83	423.67	602	428	0	0	0	631	3.5	259.5	316.5	26	410.28	12.5	428	33	31.5	144	265.5	316.5	10	8	71	84	301.33	286	524	323.83	300.17	0.5	0	64
12:30 AM		319	277.5	0	95.5	400.67	64	515.5	235	2	22.5	0	196.5	323	323	193	154	554.6	10	130.5	4	3	42.5	526	129.5	55	134.5	236	479.5	128.17	220.67	520	144.87	419	9	5	3.5
12:45 AM		497.5	179	0	2	433.67	427.83	358	160.5	4	139.67	35.5	444.5	384.67	532.5	362.17	371	136.47	321.5	233.5	148.5	2	16.5	248.5	215	1	447	242	194.5	5	322	350	66.87	522.5	0.5	0	158.67
1:00 AM		370	164.5	4	0	95.5	704.33	531	280.17	75	0	490	554	327	352.5	396	42	42.5	6	318.5	439.47	1	8	0	152	54	437	100.67	221	25	530.5	386	10.67	253	15.5	35.3	389.67
1:15 AM		51.5	0	54.5	496	186.5	132	465.5	171	614.33	0	497.5	426.67	60	190.17	402	446.25	257.12	2	110	6.5	28.5	9.5	0	444.5	529	270	284	285.5	0	146.83	456.5	184.27	465.5	764	3.5	281.83
1:30 AM		41	305	104.5	659.5	66.5	395.83	193.5	55	460.5	97	745	466.92	0	275.67	628.5	300.5	4	33	12.5	3.5	38	3.5	0	146	684.83	178.5	233.67	299.17	4	205.5	347	298.33	540	511.5	257.83	376
1:45 AM		88.5	349.17	214.5	537.5	0	11	12	5	355	462.17	591	109	1	13	264	374	0	22	21	2.5	0	38	83	127	550.67	10	10	26.5	51	6	378	117.33	172.5	738	454.53	176
2:00 AM		408.5	216	66.5	97.5	0	1	1	0	223.67	339	398	147	97.67	3	356.5	255	40.92	0	6	0	1.5	242.5	316.5	2.5	546.33	1	0	10	284	9.5	200.5	5.17	498	215	434.58	392.67
2:15 AM		550	22	251.5	0	0	8	20	37.5	404.17	99	477	2	1	0	368.17	204.5	7.5	32	4.5	34.33	18	45	212.5	0	461.5	7.5	0	4.5	193	5.5	0	26	15.5	464.5	517.17	303.67
2:30 AM		14.5	0	100.5	74	25.5	11	0	59.5	348.5	5.5	483	0	24	42	507.17	230	341.92	205	44.5	404.4	94.5	183	2	0	20	49.5	24	15.5	320	13	20	7.83	2	79.5	270.17	110
2:45 AM		0	288	2	531.5	8	2	37.5	211.67	369.67	216	436	16.5	0	414.67	621.33	4	380.33	404	4	750.52	313	221	48.5	0	0	306.5	0	152.5	180	8	0	3.83	1.5	16.5	404.67	69.5
3:00 AM		90.5	395	0	371.5	278.83	3	314	478.67	144	6	287	36	1	376.5	267.33	3.5	567.35	418	11	822.43	268.5	68.5	0	1.5	22	233	14	84	358.67	4	3	15.5	32	1.5	6.5	169
3:15 AM		261	417	2	42.5	604.17	135.75	501.5	143	2	3	300.5	1	1	379.5	447.5	0.5	771.5	506	4	1139.57	267	10.5	0	66	3.5	520	159	329.5	256	190	9	526.2	4.5	2	2	91
3:30 AM		222	463	27	8	273.17	155	453	310	0	5	535.5	1	13	258.5	553.17	20.5	299.6	367.5	26	716.78	431	12.5	0	44.5	13.5	83	297.5	160.5	215.5	174.5	1	202.33	73	22.5	206.17	1
3:45 AM		53.5	153	0	21.5	129	267.92	281.5	328.5	54.5	5	410	1	0	109.17	469.5	27	418.85	407	103	400.02	310.5	40.5	27.5	247	17	4.5	232	13	384.83	560.67	2	226.5	730	392	128.5	4
4:00 AM		0	5	0	400.5	319.17	6	401.5	102.5	51	31.5	25.5	127.5	15.5	4.5	327	178.5	0	350.5	218.5	711.03	312.5	27.5	117	137	0	0	305.5	0	118	265	6	277.33	233.5	119	258.67	3
4:15 AM		11.5	21.5	4	192.5	12.5	355.17	296	1	0	386	5.5	570	273.67	0	201.5	154.5	21.58	596.5	272.5	56	141.5	3	397	282	111.5	1.5	172	13.5	22	353	241	39.5	512.5	547	117.5	157.17
4:30 AM		274	0.5	127.5	2.5	17	242.33	12.5	1	0	248.67	2.5	229	329.5	98.5	102	416	0	291.5	224.5	4	105	22	266	76	478.25	3	228.5	3.5	0	236.5	292	25.5	119.5	53	94.22	385.33
4:45 AM		329.5	24	198.5	0	128	11	0	1	17	52	0	39.5	279.67	177	0	160.5	43.67	53.5	254.5	52.6	58	258	242	194.5	280	1	153	18	25	44.5	402	14.5	33	160.5	0	510.17
5:00 AM		1.5	458.5	68.5	4	190.5	3	1	0	102.5	15	1	67	307.5	1	4.5	440.5	0	8.5	215.5	529.75	10.5	166.5	404	365.5	346.67	139	65	272.5	4	170	252	15	0	9.5	3.67	183.17
5:15 AM		0	394.5	394	381.67	117	1	237	52.5	498.83	110	0.5	41	292.5	97.5	0	268.5	53.6	38.5	224.5	712.87	0	133.5	394	161.5	545.33	212.5	44	168.5	1	347.83	266	20.5	26	0	2.5	358.5
5:30 AM		172	351	92	338.5	0	0	418.5	184	236	192.17	370	0	18.5	0	7	184.5	413.43	0	305.5	819.67	6.5	204.5	147	259.5	455.33	366.5	20	67	15	0	322.5	137	498	197.5	0	293.67
5:45 AM		232.5	19	108.5	70	7	3	314	158	234.67	0	669	113	0	1	357.5	301	321.6	88	159	690.73	19.5	6	3	325	550	203	1	12	366.83	2	409.5	617.33	361	317	0	291.5
6:00 AM		258	18.5	17	0	191.5	3	347.5	23	6	137.83	415	530	303.83	362.5	349.5	116	684.07	247	23.5	179.07	1	29	0	13.5	631.5	53.5	10	10.5	252.83	0	330	573.5	231	2	375.17	302
6:15 AM		4	463.17	0	0	20	47	2	1	0	231.67	520	127	208.5	273.5	531.5	44	724.95	586.5	2.5	29.5	0	57	2	279	515	0	243.33	170.5	526.17	105.5	285.5	382.83	188.5	394.5	357	469.67
6:30 AM		60.5	359.5	87.5	466.5	25	288.67	61.5	0	2	106.5	210	62.5	13	96	403.5	9	567.18	278	8.5	0	234.5	10	314	66.5	374.33	29.5	216.33	11	287	269.5	85.5	354	3	629.33	219.5	584.17
6:45 AM		255	70.5	75.5	265.5	0	219.67	275.5	28.5	117	44.5	26	4	1.5	129	551.5	22	172.33	11	14	2	163.5	13	388	36	15.5	481.5	116.5	15	309	334	51	289.67	111	105.5	125.67	641.75
7:00 AM		2	0	276	0	0	4.5	333	57.5	1	36	0	0	204.5	2	244.5	107	183.08	5	6.5	92.6	148.5	7.5	250	2	1	29.5	4.5	8.5	79.67	290.83	2	330.7	238	0	288.92	311
7:15 AM		0	0	99	0	1	1	0	166.5	2	51	0	0	104.5	13	6.5	136	0	0	128.5	773.92	26.5	7.5	7	0	67.23	0	1	17.5	134.5	134.5	0	292.43	280.5	18	85.17	245
7:30 AM		48.5	1	2	9.5	2	1	0	82.5	0	90.83	14	0	4	0	2	238	0	32	215.5	37.5	7.5	2.5	0	2	3.67	1.5	0	31.5	41.5	19.5	1	159.67	132.5	88	15.83	38
7:45 AM		19	212	0	10.5	19	7	0	170	0	167	0	0	248.17	38	42	113	67.83	0	62.5	1	5.5	5.5	0	0	17.67	0	2	100.5	0	3	2	36.15	0	0.5	0	0
8:00 AM		0	194	5	26	0	56	1.5	0	17.5	25.5	0	232.5	123	8	28.5	44	273.28	1.5	1.5	394.2	0	32	7	2	22.5	10.5	0	103	0	0	18.5	9.05	0	2.5	23.83	0
8:15 AM		0	11	21	28	0	0	121	3	169	10	1	41	0	0.5	5	0	63.17	4	7	131.08	0.5	12	69	20.5	3.33	15.5	73	3	0	1	1	0	0	3.5	195.83	103.67
8:30 AM		89.5	0	2	1	32.5	3	3.5	0	36	19	0	2	0	2.5	0	11	0	0.5	0	102.43	2	13.5	0	6.5	295.25	10	2	38	20	12	1	29.5	25	60.5	282	0
8:45 AM		31	0	0	0	178.5	0	0	5.5	2.5	12	26	1	1	5	0	10	0	4.5	0	1	79	1	0	2.5	269.5	287.17	0	0	3	3.5	2.5	115.07	0	75	29	0
9:00 AM		0	0	0	16	11.5	7	0	20	1	0	154	0	70.5	202.5	4	14	0	82	1	8	78.5	16.5	0	0	61.5	0	0	12	0	39	169	0	2	0	2	0
9:15 AM		0	0	2	271.5	1	90.33	0	84	2	0	51	0	0	367.5	132.5	4	49.18	151	1	4	76	20	1	4	2.5	0	2	9	1	187.5	155	7.2	0	0	6	0
9:30 AM		104	0	2	66	0	153.17	0	1	0	0	69	1	0	7.5	98	5.5	0	6.5	6	6	9	82.5	2	145.5	0	1.5	3	25.5	0	69	101	0	1	31	45.5	0
9:45 AM		51	138	98	0	2	163	0	0	5	95	0	3.5	0.5	0	0	132.5	28.92	0	41	187.02	0	3.5	1	149.5	2	0	54.5	20	12	167.5	0	0	14	90	25.5	154
10:00 AM		0	114	9	0	2.5	1	41	0	0	49.5	0	41.5	8.5	2	0	92.5	145.52	32.5	333	136.08	0	25.5	2	2	0	2.5	150.83	174.5	226.67	8.5	0	0	8	1	0	190.33
10:15 AM		0	2	0	0	5.5	0	74.5	45.5	30	5	2.5	347	3	1	4	0	56.25	26.5	53.5	2	1	39	142.5	0	2	376	1	2	97	0	0	25.37	3	0	67	117.5
10:30 AM		4.5	0	1	1.5	0	2.5	0	191	242	98	3.5	157	205.5	4	0	0	0	2	21.5	0	1	12	58	0	57.5	89.5	0	1.5	0	0	0	0	5.5	14	219	11.5
10:45 AM		153	31	60	71	1	0	0	99	85.5	5	0	0	19	6.5	25	21.5	1.67	8.5	7.5	0	9	11.5	0	2	372.67	0	0	11	0	42.5	0	0	42	2	49.5	2
11:00 AM		54.5	266	9	2	3	0	0	0	0	9	54	0	147	1.5	99	0	34.5	10	9	20.83	0	4.5	5	0	349.33	0	22.5	8.5	0	80.5	0	0	200.5	1.5	1	1
11:15 AM		2	74	0	0	27	0	0	0	2	41	165.5	1	8	2.5	71.5	0	0	0	13.5	4	2	65.5	4	2	119.67	0	63.5	9.5	83	0	0	0	208.5	40	6.5	0
11:30 AM		3	0	1	0	257.17	0	227.5	0	0	72	128.5	0	3	1	0	0	215.25	0	13	618.62	127	96.5	0	0	18	0	0	17.5	75	3	129.5	132.67	29.5	156	13	0
11:45 AM		20.5	0	1	0	24.5	0	129.5	0	40.5	21	0	0	4	6.5	0	75	101.58	6.5	40.67	310.72	125	18	5	167.5	3	0.5	0	20.5	272.17	5	27.5	8.05	2	19.5	1	0
12:00 PM		3	0	7	46	0	139	0	8.5	0	25	0	1	0	0.5	0	29	0	16	4.5	338.45	199	6	52.5	53	2	2	2	12	58	2	1	0	12	1	59.83	2
12:15 PM		2	22	15	249	0	104.5	1	120	0	56	0	0	10.5	3	1.5	1	1.67	0.5	2	26	10	5.5	3.5	3.5	2	51.5	2	10.5	7	0	15.5	0	10	4.5	102.5	2
12:30 PM		37.5	239.5	4	34	2	0	1	150	2.5	31	0	1	7.5	86.67	18.5	3	3	6.5	110	2.33	3	10.5	0	1	1	403	107	46.5	0	0	4.5	0	12	0.5	2	189.5
12:45 PM		98.5	26.5	0	0	2	1.5	2	42	2	48.5	0	1	0	1	0	0	65.5	33.5	147.5	0	2	16.5	2	0	0	0	72.5	215.17	5	0	0	0	40.5	82.5	0	153
1:00 PM		1.5	0	0	1.5	0	0	0	0	7	365.33	1	40	13	0	1.5	11	34.67	181	38.5	11.83	3	23.5	4	33	56.5	0	0	122	0.5	15	0	0	1.5	38	7	7.5
1:15 PM		74	0	0	1	1	0	0	0	0	492.67	0	59	3	2	1	0	0	79	2	52.25	3	6	0	3	15	7	0	17	3.5	116	0	0	20	2	1	2
1:30 PM		0	0	42	18.5	1	0	53.5	6	1	246.5	7	0	0.5	2	2	2	30.83	2.5	7	317.98	5	28.5	50	0	0	1	1.5	4.5	2	240	10	0	8	2.5	3.5	6
1:45 PM		1	0	176	124.5	0	0	116.5	46	34.67	54	137	0	14.5	0	2	22	0	0	15.5	3.5	5.5	13.5	274.5	0	2	1	29.5	21.5	2	9	0	2.5	18	6.5	1.5	4.5
2:00 PM		4	9	49	18.5	15.5	29	5	6	305.5	7	77	0	24	1	2	167	18	0	2	1.17	4.5	1	124.5	2.5	3	0	96.5	1.5	105	2	93.5	0	2	39	31.5	7
2:15 PM		0.5	183	8	0	202	0	0	43	342.5	0	66	0	191.5	113	1.5	201	14.33	0	6.5	4.33	144	8	0	3	9	148	10	0.5	177	4	195.5	1	6	106.5	72.5	73.5
2:30 PM		82.5	2	0	0	144	0	1	189.17	51	10	0	2.5	13	152	273.17	58	8.67	8	49.5	31	27.5	2.5	0	14	209.83	62.5	3	15	8	10	24	1	55	100.5	3	5
2:45 PM		172.5	0	0	0	2	0	0	3.5	0	0	0	3.5	0	4.5	373	13	42.92	6	5	81.33	5.5	8	0	192	0	123	0	14	0	4	1	10.07	132	16	0	0
3:00 PM		1	19	0	19	0.5	2	19	2.5	1	6	0	62	0	4	42	2	106.53	3.5	3	109.15	2	120	0	98	0	24	0	21	1	0	25	0	129	6	0	5
3:15 PM		0	382	0	50	1	1	0	0	4	13	2	15	6	0	0	0	283.02	7	11	45	1	32.5	5	9.5	0	0	0	1.5	0	1	2	0	9	0	7	1
3:30 PM		5.5	285	22.5	0	2	5	113.5	4.5	0.5	60	0	2	1	0	0	4	263.08	112.5	80	6.67	2	50.5	4.5	3	2	0	4	27	13.5	4	1	0	2	2	37.5	0
3:45 PM		85.5	1	15	0	1	0	33.5	2.5	0	75	43.5	2	3.5	1	1.5	14	1	28	216.5	26.67	25	3.5	51.5	4.5	0	2.5	14	48	182.5	0	49	15.6	2	11.5	0	6
4:00 PM		136.5	2	0	4	2.5	1	1	0	4	292.83	128	0	173.5	0	1	11	2	0	106	4.33	124	8.5	2	23.5	7.5	7.5	9	183	170.17	6	74	0	2	6.5	6.5	3.5
4:15 PM		174	71	0	0	37	58.5	0	3	0	316	89.5	0	156.17	5	0	12	0.5	1.5	232	10.67	25	4.5	0	0	75.5	0	0	5.5	27.5	28	0	0	1	39	6.5	57.5
4:30 PM		4.5	0	4.5	9	124.5	218.17	1	29.5	14	395.3	3	3	2	2	0	162.5	21.53	2.5	46	110.85	137	47.5	4	1	27	1.5	27.5	4.5	3	30.17	15	25.73	2	95	39.5	92
4:45 PM		2	0	0	48	163	2	1	4	0	287.5	2	2	5	19	0	68.5	2	0	1	540.68	87	5.5	0	3	3.5	40	84.5	22.5	0	207	6.5	151.07	6	32.5	33.5	7
5:00 PM		10.5	0	5	514	4	0	3	6	4	67	0	28.17	12	194	12.5	1	0	48	10.5	781.12	4	77.5	0	1	0	254	68	11.5	0	127	6.5	259.33	0	0	470	5
5:15 PM		39.5	7	11.5	54	2	7.5	2	106.67	14	22	0	171	197	94.5	119.5	1	24.08	7.5	23	320.55	0	0	29.5	4	0	509	0	101.5	21	8.5	3	44.17	25	1.5	104.5	2
5:30 PM		2	478	92	0.5	3.5	53	41	312.33	0	15	150	68.5	83	3.5	93.67	4.5	133.25	0	4.5	213.67	0	1.5	42	19	96.5	193	0	16	182.67	0	235	5	25	0	16	0
5:45 PM		39	284	4.5	0	0.5	32.5	2	3	177	4.5	201	221	2.5	0	0	0	2	0	14	26	3	57.5	74.5	87	402	0	0	6	420	6	235	1.67	0	24	0	54
6:00 PM		184.5	34	0	1	7	1	1	0	447.67	257.33	97.5	1	32.5	56	0	21.5	0	15.5	17.5	0	9	48	2.5	243	151	3	37.5	12	35	4	42	2.33	4	84	1	15
6:15 PM		86.5	0	3.5	181.5	20	5.5	107	0	157.5	536.33	3.5	1	206	59	4.5	3	8	221	114	20.17	36.5	16	11.5	7	1	0	189.17	50.5	1	94.83	0	79	41	37	12.5	0
6:30 PM		13.5	86	60.5	451	454.17	98	142	1	14	408.5	6	73.5	304.5	1	539	62	43.92	128.5	63	64.55	96.5	44	44	0	4.5	13	16	36	40	1.5	230	8.17	10	1.5	57.5	100.5
6:45 PM		419	595	265.5	566	651	44	1	18	171.17	119.5	313	255.9	217.5	259.5	266	77	12.83	0	14	4.5	194.5	55	1.5	27	14	213.5	6	224	308.67	21	180	21.83	72.5	68.67	2.5	160.17
7:00 PM		371	493	332.5	717.67	687.33	49.5	45	101.5	518.67	272.33	482.5	247	185.83	508	543	85	283.43	158.5	20	16.5	211.5	151.5	225	6	403.5	457	86.5	89	374.67	296	254	378.33	255.5	220.5	103	329
7:15 PM		449	638	157.5	537	649.67	347.67	0	1	126.5	132	584.5	584	877	485.5	368	92	45	437	121	2.5	192	93	538	378	827.33	483.5	203.5	597	162.67	335.17	209	432.67	414	757	483.17	349.67
7:30 PM		426	653.5	117	683	502	26	226.5	10	577.67	3	464	550	452.33	224.5	388.5	131	423.78	357	220	57.92	430.5	303.5	508	352.5	675	426	156	347	442.67	628.67	424	430	469	446	551.83	473.67
7:45 PM		486	514.5	271.5	718	595.5	232.5	449.5	115.5	611	218	487	723.75	414.67	291.5	407.4	361	707.35	424.5	207.5	1003.93	245	98.5	362	338	230.83	428.5	245.5	367	345	468.5	426.5	293	374	485.17	692	337.67
8:00 PM		543	540.5	286.5	522	641	278.5	566	502.33	567.17	318.17	416	141	265	332.5	302.17	248.5	336.17	604	346	877.52	586.5	218.5	393	399	473.5	410.17	187.5	321	353	486	190.17	300.5	262	653.5	413.17	257.33
8:15 PM		547	561.5	190	696	361.67	128.5	468.5	228.67	676.67	302.5	221	452.5	350	468.67	363.67	445.5	688.75	491	314.5	608.53	335	289	340	13	677.67	570	205.5	216.5	401	206	800	213.5	62.5	465.67	430.17	327.67
8:30 PM		581	465.67	180.5	649	391.33	401.67	434.5	326.5	461	419.33	523	564.5	381	469.67	136	425	925.75	447.5	335	938.33	180	124	431	392	479.67	325.5	292.5	18.5	287.67	700	575	252.67	2	425	330.17	161.67
8:45 PM		546	508.5	265	608	289	450.83	432	273	456.67	214.2	500	370.5	593	356.5	113	231	274.79	866	244	735.23	410	222.5	721	11	246.17	414	160.5	7	183	136	711.5	264	37.5	412.5	511.67	273.17
9:00 PM		392.5	476.5	23	601	501.67	208.5	563	314.83	310.83	485.67	405	60	508.5	239	0	439	837.31	416	340.5	753.25	150	78.5	220	20.5	753.5	395	180	347.67	286.5	574.5	325.5	43	512.5	408	453.5	148.17
9:15 PM		386.5	598.5	251.5	581	515.5	249.17	608	238.67	289.83	160.5	387	73.5	355	230.5	108.17	286	485.77	378	223.5	538.4	493	84	415.5	139.5	519.33	479.5	201	332	235.5	590.17	655	44	531.5	573.5	508	207
9:30 PM		506.5	479.5	233.5	626	388.5	60.67	310	273.67	390.5	473	511	1	352.5	202	533.5	195.5	509.58	555.5	249	661.08	447	28	529.5	421	7	434	59.5	133	236.5	722.67	648.5	17	109	263.67	306	272.42
9:45 PM		55.5	551	50.5	549	348	100.5	615.5	164	186	38.67	437	8	73	24.5	214	294.5	1014.68	352.5	446	838.83	230	80.5	286.5	250.5	6.5	395.5	1	155.5	283.67	277	409.5	45	5	412	371	148.5
10:00 PM		398	388	286	523	188.5	0	431	178.5	675.67	549	377	1	452	291.83	211.5	462	134.12	490	457	950.62	571	224	439.5	290.5	442.5	606	2	414.5	240	615	872.5	36	0	558	47	36
10:15 PM		312	487	0	408	635	0	685	136	330	398.33	482	44	332	327.5	298.5	199	608.42	470	165	419.73	405	79.5	2	190.5	515.67	282	12	379.5	202.5	210	565	176	257	273	250.5	2
10:30 PM		470	410	140.5	408.5	237	15.5	516.5	5.5	223.67	340.83	452	39	474	275.5	9.5	321.5	454.45	674.5	350.5	975.55	263	56	0	175.5	367.5	324	169.5	251.5	239.5	581.5	316.5	408.17	542	475.5	332	8
10:45 PM		4.5	428.5	202.5	557.5	510.5	48.17	467.5	293.17	538.17	37.5	450	11	399	217.67	53.5	61.5	997.5	457.5	377.5	602.93	294	30.5	57	405.5	480	374	95.5	526	211.5	440.5	33	406.5	200	136.5	457.17	4
11:00 PM		215	369.5	136	311	0	92	322.5	613	359.17	8	437.5	5	60	286.67	192	522	809.72	390	397	809.92	159.5	70.5	27	184	272	353.5	316.33	309.5	138.83	316	0	456.5	403	51.17	407.6	127
11:15 PM		28	497	345	300	0	391.67	445	228	159.33	89	549	67.75	434.5	417	374	202	475.93	737	379.5	575.7	308	209.5	1	372.5	436.17	576.5	211.83	286	302.17	556	0	288.67	651	151	58	177
11:30 PM		223	152	29	261	34	170.67	551.5	290.5	306.67	306.83	285.5	576.5	169.5	389.5	243.5	149.5	483.8	378	325	1018.02	197	20.5	240	175	7.5	465	415.17	212	278.5	185.33	57	315.5	371	282	9.5	252.75
11:45 PM		483.5	390	240	508	362.5	459.67	390.5	363.5	124	458	497.5	480.67	111	347.17	545.83	9	727.02	518	338.5	725.43	23.5	399.5	391.5	28	53	178.5	93	160	260.67	662	403	325.5	152	489	4.5	236.33
12:00 AM		454	197	258	18.5	522.67	405.83	253	171.5	9	225.5	312.5	97.5	174	257.5	310.17	70.5	690.43	260	416	402.12	212	161	482	73	2	335	176	298.5	332.33	448.33	665	373.83	398.5	445	39.5	146.5
12:15 AM		30	276	134.5	119	453.17	186	537	282	1	191.5	379	354.5	455.83	281.33	696	0.5	168.77	6	249	595.65	114.5	326	315	40	15.5	3.5	72	34	320.67	237.67	535	286	405	455	46.5	177.83
12:30 AM		1	282.5	14	481.5	174	313.17	278.5	17.5	1	15	381.5	680.5	210.5	117	405.5	63	791.38	3	329	23.33	36.5	190.5	675.5	129	2.5	0	138	0	183.5	312	130	356.17	408.5	28	389.5	209
12:45 AM		46	26.5	39	59.5	38	266.17	330	439	4	2	194	370.5	446.83	4	504	185.5	306.33	2	228	0	6	258	351	444.5	25.5	0	7	2	232	222.5	95.5	213.5	427	11.5	526.67	149
1:00 AM		10	19.5	67	49	2.5	395.83	421.5	231.5	32	3	3	34.5	299	1.5	406	106	153.13	1	35	8	0	71	339	131.5	47	0	13	6	233.33	51.5	251	427.5	396	0	350.5	114.5
1:15 AM		15	245.5	0	436.5	0	32.5	482.5	253.5	480.17	73	1	8	160.5	16.5	170	413	0	43.5	3.5	332.57	0	7.5	205	319	616	0	0	339	27	0	41	122.83	280.5	4.5	450.33	20
1:30 AM		29	415.5	0	87	25	0.5	76	197	341.5	135.67	6	0.5	1	12.5	20.5	104	0	124	0.5	247.47	0	83.5	2	442	363.67	285	53	230	1	0	433.5	2	233.5	4.5	255.67	5
1:45 AM		1	487.5	2	6.5	24.5	6	372.5	121.5	378.5	264.83	0	0	2	488.83	2	337	0	213	1	600.18	12.5	160.67	0	421.5	464.17	592	110.5	299.5	0	0	542	5	19	0	311.08	9
2:00 AM		523	334.5	3	3	470.67	0	39	0	322	115.17	71.5	3	29	326.17	3.5	252	42.58	626.5	3	803.92	3	12.5	0	88.5	457	325	204.5	221.5	0	8	65.5	301.5	0	10.5	262.25	33.5
2:15 AM		407.5	225.5	28	2	183.5	4.5	4	0	17	502	361	0	0	217.33	22.5	181	0	335.5	5	866.1	188.5	3	24	0	173.5	646.5	293	304.5	0	0	243.5	261.67	2	633	4.33	6.5
2:30 AM		236.5	375	261	54.5	477.33	262.83	0	1.5	331.67	316.67	289	0	16	396	7	259	106.5	624	20	796.12	368	29	144	0	51	418.5	176.5	48.5	2	85	4	505.75	54	242	25.33	255
2:45 AM		116	5	53	549.5	169	137.83	144	143.17	0	281.5	464	86	28.67	182.5	58	51	497.92	705	99	399.77	431.5	9.5	376	1	3	184	175.5	0	1	87	8	130	20	373.5	40.17	252
3:00 AM		1	0	370	419	325.17	309.83	254.5	4	0	14	222.5	339.5	367	388.5	71	22	511.7	79	122	2.83	146.5	13.5	243.5	0	5	373.5	22	4	134.83	673.5	0	35	20	406.5	45.5	159
3:15 AM		17	0	266.67	12.5	4	277.67	699.5	3.5	0	11	559.5	37.5	456	117.5	555.5	0	559.43	95	335	0	313.42	156.5	398.17	64.5	2	5	0	220.5	513.67	533.17	0	1	10	180.5	0	355.83
3:30 AM		93.5	1	55	0	0	134	250	24	26.5	15.5	239	432.5	334.17	188	309.5	0	559.15	234.5	432	0	170.5	223.5	514	94.5	8.5	0	3	1	431.17	164.5	0	3	2	11	6.5	382.67
3:45 AM		160.5	55.5	231.67	1	0	9	69	358.5	0	26	14.5	294.83	330.5	17.5	468.5	25	180.63	251.5	476.5	0	105	34	194.5	27	6.5	8	7	95	319.17	423.83	52	8	0	51	178.83	463.5
4:00 AM		341	452.5	7	1	14.5	21.5	125.5	205.5	94	21.5	0	165	17	0	166	7	612.08	1	202	141.03	493	82.5	55	4	21.17	18.5	24	170.5	445.33	414.5	41.5	25	14	341.5	391	168.5
4:15 AM		49	123.5	0	10	451.5	0.5	23.5	290.5	135	516.83	13	16	26	13	418.17	123	356.85	0.5	300.5	794.92	201.5	242.5	2.5	133	436.83	192	156	3	313.67	435.5	111	308.58	356.67	469.67	452.67	164.17
4:30 AM		0.5	3	0	531	63	94.33	6	426.5	0	399.92	0	72	194	12	235.5	178.5	233.82	55	463	1079.3	49	185	0	52	394	362	79.33	8.5	448.5	83.5	575.5	301.5	526.67	34.5	257	329.5
4:45 AM		69.5	444.5	76.5	386	49.17	174.33	0	168	0	227.17	0	0	0	190.17	141	161	0	1.5	302	965.9	1	37	0	394.5	395	204.5	311	164	413.5	25.5	80	240	329	37.5	152	310.67
5:00 AM		31.5	299	104.5	227.5	0	256.5	0	0	310.17	98.5	123.5	0	3	388.67	5	245.5	28.6	43.5	220	786.9	8	11	2.5	143.5	604.5	6	343	88.5	320.5	0	0	130	480.5	0	199.5	140.5
5:15 AM		2	475	153	7.5	1	69.5	241	0.5	477.17	27.5	385	0	202.5	141	1	408	21.25	384.5	160	257.43	0	6.5	144	154.5	412.67	79	159	110.5	254.83	1	20	0	418	1	13	360.83
5:30 AM		1	155	102	2	83.67	2	433	0	332.5	314.67	281	285.67	302.5	219.5	365	344.5	240.17	281	20	379.95	0	128.5	362.5	315.5	353.5	174.5	163	3.5	212.17	0	1	14.5	518.5	74	197	355.83
5:45 AM		32	199.5	79	23	290.5	7	422	54	34	526.33	440	386.5	365	209	334.5	388.5	696.35	660	6	278.75	0	48	431	215	17.5	259.17	193	107.5	488	162.17	543	30	411	614	345	299.5
6:00 AM		313.5	3	84	377.5	97	4	519	302	0	234.67	114.5	261.5	171.5	40.5	331.17	175	502.78	243	15	2	113	19	359	67	0	0	260.17	316	305.67	244.5	301	366.5	130	100	321.43	265
6:15 AM		2	403.5	32	295.5	2	0	226	269.5	19.5	212.5	10	454.67	0	9.5	473.67	117	87.27	518.5	162.5	2	299	137.5	109.5	182.5	70.5	195.5	148.17	71.5	154.83	45.5	169	310	12	271.5	99.67	341
6:30 AM		0	24.5	0	0	0	379.5	18	98.5	429	14.5	0	31	159.33	357.5	258.17	9	1	450.5	311	309.38	71	7	0	197	562.5	322	127	0	634.67	7.5	406	318	0	9	9	21
6:45 AM		1	141.5	287.33	1	2	315.58	2	0	496.33	20	1.5	694	194	304	0	0	0	48.5	239.5	696.58	63.5	9.5	15.5	103.5	694.67	239.5	2	2	233	1	41	286	41	0	42.33	34.5
7:00 AM		3	1	198	4	8.5	89.17	123	0	384.67	49.5	4.5	382.25	1	148	1.5	2	20.25	4.5	371.5	471.05	83.5	12	106.5	10	228.5	1	0	2.5	28	2	145	258	304	1.5	5.83	355
7:15 AM		37	218.5	8	20	2	0	80	37	56	27.5	145	250.67	7	7	18	0	115.27	1	26	38	0	35.5	195.5	0	34.5	1	0	1	11.67	7	0	135	248	0	121.83	468.33

## Sheet: Fig 4 C
	Control																											Ntn1 cKO
Day 1	90	58	46	54	56	67	0	11	57	2	92	155	141	110	57	41	74	72	23									63	69	99	111	36	46	78	56	64	74	57	62	66	51	101
Day 2	109	57	57	69	70	73	48	68	54	47	122	72	111	115	89	56	90	79	121									70	52	82	110	58	68	78	84	86	81	116	77	86	124	121
Day 3	148	79	65	56	61	109	96	98	72	106	112	89	88	143	93	75	66	103	169									113	78	104	92	80	68	181	116	121	90	138	61	102	71	110

## Sheet: Fig 4 C FR5
	Control																									Ntn1 cKO
Day 1	55	102	87	74	72	116	62.6	116	97	96	71	187	83	102	67	59	78	99.2	175							79	80	109	95	72.2	96.8	141	93	89	79	120.2	62	98	81	121
Day 2	93	69	81	67	58	100	73	93	80	98	106	93	95	112	67.8	69	96	115	166							92	86	92.2	82	76	54	135	86	93	86	106	75	90	60	138.8
Day 3	215	150	92.4	68	87	79	78	110	99	90	100	151.6	86	123	76	60	96	117.6	142							137	166	113	106	71	66	132	92	115	92	107	89	96	93	133

## Sheet: Fig 4 D
Control																											Ntn1 cKO
356	408	419	296	430	376	346	419	441	356	356	336	408	430	386	419	386	519	441									326	627	356	397	306	277	386	419	441	386	376	366	346	386	197

## Sheet: Fig 4 E
	Control																											Ntn1 cKO
Day 1	471	462	305	0	209	352	431	7	353	220	440	414	608	601	273	450	414	597	416									329	456	488	287	312	426	342	762	379	693	667	677	435	255	458
Day 2	79	163	95	185	95	117	122	523	163	65	242	228	161	117	91	90	145	352	167									194	117	135	98	159	152	172	222	139	246	230	179	181	142	154
Day 3	131	364	59	117	98	83	114	268	165	60	151	206	130	71	72	84	87	283	76									140	107	88	124	146	58	100	119	110	181	233	190	184	63	110
Day 4	126	269	57	81	96	84	52	135	126	65	89	101	93	90	41	37	103	242	113									160	75	81	126	194	74	76	91	104	118	170	146	179	63	70
Day 5	101	166	30	40	30	68	61	94	60	48	67	102	58	49	27	29	53	124	60									115	39	40	80	98	61	69	87	56	81	138	110	121	124	58

## Sheet: Fig 4 F
	Startle pulse (dB)	Control																									Ntn1 cKO DATIRESCre
null db	65	24.1	79.7	27	105.9	55.6	39.6	53.8	12.3	25	29.8	22.9	24	28.5	19.8	29.8	45.4	20.2	29.4								37.6	42.1	44.6	30.5	32.2	30	39.8	35.8	26.8	35.3	28.5	79	15.2	36.3	28.4
80 db	80	62.6	77.1	176.7	95.5	207.5	39	172.8	20.5	51.2	53.7	43	27.4	51.3	29.9	13.3	79.2	32.7	25								160.7	67	30.3	31.8	56.1	49.5	35.3	52.7	66.4	8.8	24.4	49	123.1	49.3	42.6
90 db	90	177.6	122.5	269.6	160.1	726.5	75.2	160.2	31.5	75.1	33.6	93.3	79.2	46.4	44.9	44.5	129.7	39	47.4								272.9	89.3	121.6	103.5	59.3	31.2	46.9	156.5	50.8	29.3	41.1	40.1	142.5	57.2	46.9
100 db	100	367.2	102.7	211	122.3	645	81.6	343.2	60.7	129.9	91.5	123.9	153.8	88.3	60.2	72.7	86	132.9	67.9								218.7	93.8	102	148.5	157.3	37.6	54.8	110.8	103.7	101.2	57.6	62.5	164.8	70.7	30.4
105 db	105	673.5	161	279	358.3	880.7	127.9	310	227.6	212.8	175.3	88.8	272.5	145.5	54.2	125.5	120.7	188.4	99.1								249.7	109.8	85.6	116.8	128.8	84.1	84.4	161	235.8	178.7	70.9	71.8	386.2	85.7	64.3
110 db	110	940.3	347	354.5	432.2	837.4	109	523.8	487.8	209.4	439	109.4	354	264.7	100.7	303.7	211.8	348.1	180.2								210.9	229.5	182.5	127.1	636.7	97.7	137.8	276.3	279.7	396.1	132.3	102.6	509.9	126	90.9
120 db	120	1381.2	286.5	422.4	600.6	1131.4	207.1	393.9	677.7	166	282.2	133.9	380.3	607.3	215.7	286.6	384.6	434	130.8								196.8	191.3	212.8	143.6	786.1	157.2	411.7	266.5	516	347.6	205.9	91.8	432.6	166.4	293.1

## Sheet: Fig 4 G
	Control																									Ntn1 cKO
5 db	49.2008	51.4722	79.1833	48.6079	81.708	61.7878	43.4415	64.1975	1.25	52.8292	58.8319	47.6341	81.449	28.2811	66.3499	-1.22	49.7198	38.7558	18.9342							18.5149	11.4213	77.5539	69.1889	66.2469	54.4638	64.5934	32.9687	57.2857	51.6674	1.7638	78.5141	43.8202	40.1833	11.403
10 db	40.1337	52.072	80.1975	61.5561	82.689	66.5684	50.6393	72.4038	26.5476	75.9655	75.1287	57.238	76.3365	21.8264	61.2633	30.0237	81.33	42.4718	48.2993							48.891	13.198	86.941	71.0654	66.3597	32.5345	80.2329	42.7151	44.2381	67.0046	39.4591	90.3184	50.2482	53.4009	71.0376
15 db	65.9401	73.8822	84.3074	68.7071	84.7952	21.742	64.4845	78.3588	46.25	73.4866	81.8037	63.7574	84.1659	55.1996	69.2007	19.1799	72.0478	18.0017	64.2857							66.297	50.8883	90.0271	73.3656	64.2548	54.9431	79.4187	58.2297	27.5238	77.9345	66.7059	91.3655	58.6099	50.0241	69.6693

## Sheet: Figure 4 H Edge
Control																									Ntn1 cKO DATIRESCre
355.222	402.603	488.555	408.275	479.88	381.048	377.644	413.147	281.415	423.29	360.827	363.63	408.542	362.095	387.187	404.271	462.129	511.979	434.301							525.192	522.055	440.04	504.304	465.866	329.396	420.154	463.263	390.657	483.283	445.245	471.471	438.906	494.361	488.822

## Sheet: Figure 4 H Center
Control																									Ntn1 cKO DATIRESCre
82.2823	72.4057	28.3617	43.9773	25.6256	49.8499	48.4485	63.8639	150.484	52.6527	62.7961	69.5362	53.3867	87.6209	56.5232	44.2442	21.021	27.0938	53.3867							31.2312	7.27394	36.7701	9.87655	31.4314	61.2613	56.1228	27.1605	62.2623	23.6904	44.311	41.7084	37.7711	19.4194	23.29
