# Supplementary material for: Netrin-1 regulates the balance of synaptic glutamate signaling in the adult ventral tegmental area
Source: eLife. 2023 Mar 17;12:e83760. doi: 10.7554/eLife.83760 (PMC10023152; doi:10.7554/eLife.83760)
Supplement: Figure 5—source data 1. [file elife-83760-fig5-data1.xlsx]

## Sheet: Fig 5 B
		Control																											Vgat ntn1
4:30 PM		80.5	9.5	14	58	210	86	266.5	32.5	389.5	403	1.5	205.5	320	307.5	161	581	373	474.5	851.73	321.5	290	31	52.5	275	65	331.5		131	1192.83	554	669	60	68.4	1344.17	19	566	248	656.17	16	189	523.5	83.5	2.5	242.5	538	13	385.5	144.67
4:45 PM		337.5	0	256	267.5	212	53	27	6	257.5	37.5	2	56.5	73.5	81.5	374	239	274.5	373.5	278.27	438	278.5	177	181	174	32	439		0	625.17	15.5	694	204.5	2.5	1363.17	267.5	600.5	369	673	5	79.5	298.5	127.5	165.33	217	405.5	3.5	88	240
5:00 PM		111	0	200.5	171	57	42	192.5	186.5	229	0	6	27	15	330	22	431	261	265.5	383.88	346.5	190	107	167	13.5	116	410.5		0	424.83	4	682.5	104.5	20	1356.83	475.5	452.5	193.5	415.5	256	1	326.5	38.5	2	79	45	6	2	29
5:15 PM		3	2.5	27.5	0.5	1	1	3.5	5.5	8.5	220	0	1	0	0	116	249	207	315	207.33	241	210.5	8	27	13.5	76.5	106.5		6	373	2.5	514	2	5	1206.42	601	570	21.5	674.5	385	26	159.5	32.5	1	3.5	64	3	102	326.67
5:30 PM		120	3	3	168	80.5	96	25	76	19.5	38	175.5	155.5	265.5	47	183	217.5	172.5	161.67	22	114	98	365.5	153	204.5	12.5	7		232.5	30.5	54	396.5	2	0	1238.83	422.5	149	145	128	346.5	188	11.5	22	298.33	133	0	1	327.5	227
5:45 PM		2.5	101	65.5	12.5	41	8	201.5	49.5	529	141	184.5	1.5	39.5	1	274	21.5	38.5	20	6.5	43.5	32	283.5	4.5	239.5	1	7		44	36	361.17	174.67	93	16	826.5	191.5	535.5	228	16.67	36	228.5	337.5	29.5	116	12.5	74	1.5	177.5	6
6:00 PM		14.5	0	187	83	173.5	101	319.5	176	294.5	333.55	31	0	3	31	214	215	50	134.17	40.48	27	0	12	183.33	118	123	360.5		2.5	0	402	7.5	203	304	94.5	33	443.5	142	479	279	134.5	357.67	55.5	243.83	276.5	24.5	13	0	3
6:15 PM		216.5	0	63.5	448.67	368	163	359	68.5	296.5	85	0	39	32	573.83	224	526.5	348.5	163	9	53.5	55.5	74.5	51	3	192	30		0	2	504.83	2	0	547.17	250.33	109	664	59	480	401.5	154.5	451	345	298.5	181	12	410.67	1	475.33
6:30 PM		99	12	169.5	434	224.5	128.5	317.5	225	327	109	24.5	64	12	333.33	65	441.5	238	85	288.47	339.5	141	92.5	38.5	1	111	18.5		4	0	218.5	7.5	58	263	1059.67	93	708	97	545	167.5	98	383	206.5	408.25	180	240.17	156.5	99.82	134.5
6:45 PM		46.5	60.43	142.5	321	366	104.5	313	143.5	84	300.5	4.5	18.5	81	229.5	285	756	454	5	140.72	142	193	32	58.5	17	16	20		37	393.5	0	424.17	36.5	0	1413.5	53	726	246	645.5	446.5	318	477.5	404.5	426	254	349	35.5	347.07	4
7:00 PM		248.5	603.67	202	579	563.5	217	599.5	521	151	698	169	5.5	5.5	741.67	398.5	554.5	356.5	25	204.67	15	100.5	94	374.17	184	8	120.5		297.5	996.17	287.17	848.5	255.5	0	1351.83	0	685.17	255	623.5	326	296.5	669.5	308	33	169	437.67	4.5	107.5	1
7:15 PM		308.5	409.8	397.5	437	443	99	492.5	765	914.5	583.5	356	190	450.17	249	397.5	517	448.5	28	562.27	366.5	280.5	692	766.17	107.5	263	568.67		272.5	1063.67	567	617.5	379	418.5	942.83	212.5	818.5	220	897.5	251	276.5	448.67	485	221	248	672.5	21.5	313.67	95.5
7:30 PM		354	976.08	297.5	253.5	476	296.5	479	460.5	764.5	669	311	178.5	297.5	384	439	458	269.5	194.5	553.25	575.5	269.5	641.5	365.33	159	245.5	457.5		370.67	1240.83	571.5	788	462	547	1333.67	564	769	229.5	879.5	414	361	639	400	341.67	247.5	734	120.5	319.33	674
7:45 PM		293.5	396.5	324	673.5	558	219	548	304	587	574.63	143	78.5	456	422	429.5	543.5	552	186.5	765.95	493.5	162.5	526.5	853.33	242.5	223	472		306	1040.17	671.67	607.5	539.5	562.17	990.17	485.5	829	163.5	503	312.5	378.5	488	341	74.5	205.5	506	666.17	593.33	687.17
8:00 PM		332	602.8	134.5	331.67	563	195.5	466.5	349	767.5	698.6	297	133.67	337.5	368.5	346	656	405.5	279.17	797.03	559.5	346.5	739	676.33	335	261.5	576.67		277	1550.33	638	452	527.5	360.5	893.17	785	659	196.5	691	318.5	299.5	437	300	20	121.5	818.17	393.17	422.92	454.5
8:15 PM		49.5	15	203.5	182	455	52.5	544	270	843.5	590.87	116.5	94	354.67	541.5	422.5	700.5	438.5	359	765.02	586	249.5	314	454	249	160.5	376.5		92.5	892.83	515	666.17	358.5	730	1496.83	542	770.5	267.5	449	240	300	652	292	126	68	754.5	528.17	456.83	816.9
8:30 PM		4	133.33	264.5	115.5	537	210	687	449	472	621.27	343.5	31.5	435.5	547.5	275	645	348.5	472.5	553.98	417.5	248.5	599.17	527.83	177	79.5	657.83		72	1616	700.17	575.5	536	429.67	1084.5	514	713.5	187	696	361.5	432	473.5	267	37.5	41	820.5	160	519.33	532
8:45 PM		5	53.5	73	20.5	617	120	509.5	334	529	488.33	237	81.5	309.5	453.5	383	524.5	455	403.5	876.17	591.5	236	328.17	439	256.5	177	277.5		115.5	1553.17	421	606.17	583.5	415.5	1429	926	832	33	577	397	288	539	11	34.5	137	1109	540	277.25	294
9:00 PM		9.5	83.67	400	52	521	110	567	291.5	321	309.5	176	3	12	663.33	215	621	372	510	1403.92	521	181.5	309	462.17	18	227	638.5		1	1079.67	259.5	659.17	248	378.67	1040	369	446	116	871	280	333	492	22	49.5	291.5	711.5	543.83	250.5	872.17
9:15 PM		126.5	0	82	35.5	567	235.67	461.5	271.5	531	589.5	102.5	172.67	392.5	367	399	582	495.67	396.5	888.5	481.5	145.5	422.5	422.5	4	198.5	427		9	1218.33	527	796.67	456	443.5	1127.5	506.5	603.5	258	979.5	343.5	339	544.5	29.5	25.5	135	1249	79	510.67	310.57
9:30 PM		170	20.17	253.5	0	636	261.5	557.5	459.5	383	214	83.5	233	348	519	493	504	294	272.5	947.56	448.5	299.5	61.5	498.17	227.5	123.5	483.5		184	1680.5	4.5	689.67	285.5	126	1130	187.5	546.5	185	699.5	307	125.5	245	203.5	316.25	210.5	912	577.67	222.17	313.5
9:45 PM		152	0	341.5	2	424	121	465	87.5	481	422	92.5	46.5	288	329.33	288	607.5	220.5	445.5	1079.31	422.5	274.5	305.5	414.5	12	0	426.5		300.5	1967.17	295.33	597.83	257	10	1688.83	528	570.5	225	700.5	170.5	206.5	446.17	169.5	285.83	195.5	870	495.83	318.33	55
10:00 PM		45.5	14	126	27.5	518	194	442	53	440	338.42	60.5	337	168.5	475	263.5	492.5	453.5	353.5	1006.6	352.5	153.5	488.5	680.5	6	19	619.5		128.5	1252.33	502.67	619.33	274	29.5	1761.5	338	624.17	287.67	876.5	14.5	33	489	257.5	200.67	112.5	1121.5	555.17	86.75	255.5
10:15 PM		10	0	210.5	188.5	378	64	440	117	708	509.1	10.5	113.5	208	221	482.5	665	399.5	474.5	1104.57	486	307	475.67	208.5	97.5	38	251.5		0	1432.83	278.17	532.67	441	7.5	1363.5	385	589	198	605	10	31.5	448.5	478.5	377.5	243	828.5	188.5	351.5	922
10:30 PM		222.5	35.17	69.5	348.67	334	16.5	437	37	224	528.42	0	150	65	499	127	511.5	349	402	549.4	400.5	153	306.5	179.5	312	204.5	50		3	1728.83	566	691.17	94.5	0	1803.33	548	551	206.5	705	2.5	55.5	54.5	349.5	288.17	20.5	1213.17	425	150.5	267.5
10:45 PM		2.5	399.17	74	217.5	212.5	39	517.5	57	307	581.85	197.5	45.5	194	488	292	517	349.5	412.5	830.22	365	340	281.5	161.17	517	126.5	58		45	1168.33	208.5	440	13	32.5	1476.17	505	702.5	245.5	480	424	37.5	50	322.5	311	60	755.67	350.67	226	571
11:00 PM		113.5	466.45	25	137.5	224	92	557	41	226	28	224	134	19	360	275.5	507.5	222	589.5	454.03	169	141.5	194	7.5	268.5	332	77		56	1523.33	4	584	16	412	1634	444	626	245	808	377.5	303.5	19	337.5	345.33	41.5	1361	366.67	276	631
11:15 PM		14.5	434.92	16.5	4	2.5	3	530.5	205.5	0.5	301.5	83	130.5	8	426.67	349.5	225.5	393.5	341	677.33	98.5	204.5	351.5	187.5	504.5	66	66		164	1244.17	7	655.67	27	601.83	1343.83	613	621.5	257	1046	168	310	271	365	16	24	988	408	59	445
11:30 PM		19	272.53	145	2	0	51	553	289	6	757.82	111.5	113.5	22.5	25.67	265	127	293.5	280.5	414.93	0	187.5	224	132.67	92	137	484		248.5	1258.83	264.17	598.5	273.33	583.5	1588.17	202.5	548	316	614.5	417	448	123	364	156	203.5	1826.2	578.67	188.5	726.83
11:45 PM		2.5	178.83	0	0.5	9	108.5	607	277	467.5	745.17	132.5	144	21.5	215.67	305	38	131.5	540	221.82	271	147.5	81	25.5	444	337	505.5		251	1811	387	723	554	465	1450.17	532.5	380	288	472.5	232	373	439	305	303	273.5	1149.17	258.67	268.67	698
12:00 AM		29	58.23	14	204	11.5	18	341.5	391.5	445	236.5	75	59	21	2	272	22	34	451.5	34.5	229	86	37	165.33	93	184.17	634.5		168.4	1224.33	315.17	635.5	395	202	1480	331.5	572	201	863	264	248	568	435	19	312	1712.5	438.67	367.17	186
12:15 AM		1.5	140	7.5	284	79.5	28.5	40.5	278.5	363.5	116	80.5	39	47	272	322	19	0	446	9	165	95	36.5	518.17	220.5	253.5	553		196.5	1775	284	602.5	500.5	550	1331.17	431.5	313	179	460	455	349.5	317	374	22.5	243.5	957.93	546.5	243.17	1064.73
12:30 AM		2	330.6	13	64	384.5	0.5	0.5	203	558.5	1	52.5	12	329	13	167	17.5	0	567.5	8.5	5	23.5	163	496.83	177	24	659		147	1275.67	274	839.5	517.5	479	1255.5	90	849.17	60	295	385	454.5	183	232	486.83	191.5	1653.67	457.67	345.5	690
12:45 AM		16	316.67	352.5	290	454.5	4.5	0	509.5	525.17	4	29	2.5	283	383	16.5	23.5	34	435.67	61.12	1	19.5	43.5	320.33	4	29	71.5		285	1294.5	248	717.67	475	191	1874	29.5	294	2.5	27.5	81.5	218.67	408	229	314.5	228	938.5	412	204.5	730
1:00 AM		71.5	332.33	149	57	280	96.5	0	190	394.5	28	164	109.5	300	412	0	61.5	289.5	436.5	39.92	2.5	48	165.95	257	30.5	99	63		117.5	1773.67	405	479.17	612	51	1265.67	7	464.5	47.5	4	435.5	195.5	202.67	235	133	168.5	1335.5	619	291.5	624.67
1:15 AM		140.5	43	322	249	413	85.5	17.5	116.5	453	50.5	99.5	24.5	194	328	3.5	165.5	383.5	574.5	113.07	0	9	82.52	170.33	7.5	22	24.5		66.5	1616.17	603	669.5	530.5	54	1295.33	58.5	391	1.5	2	48	338.5	213	142	268.92	66	1320.17	349.5	386.5	803
1:30 AM		282.5	0	34	18.5	337	86.5	38	1.5	84.5	3	88	102.5	152	445.33	41.5	481	249.17	536	233.97	0	10.5	77.25	370.17	4.5	2	22		1	1606.5	395.17	480	651	8	1446.83	13.5	505.67	2	50.5	21	300.25	62	179	258.83	1	1554.5	476.5	286	165.9
1:45 AM		279.5	5	170.5	2	136.5	8.5	435	0.5	197	44.5	189	103.5	216	284	36	531.5	236.5	693	644.38	26	0	20.4	74	11	20	30		0.5	1678.67	535.17	696.17	387.5	8	1583.33	31.5	70.5	1.5	686	17	305	6	116	31.5	0	1640	306.67	248	611
2:00 AM		21	16.67	75	0.5	0	45	582.5	1.5	54	438	157	16.5	228	361.17	10	472	275.5	589.5	721.22	261.67	44.5	31.08	8	36	46.5	6		20	1379.83	166.5	742	332.5	61	1445.33	2.5	36.5	54	709	0	224.5	12.5	27.5	22.5	0	1141	25.5	65	110.5
2:15 AM		230	3.5	24	10	109.5	31.5	552.5	0	2	534.92	159.5	119	267	295	13	531	73.5	604.5	480.35	149	143.5	461.48	0	152.5	153.5	4.5		1.5	1581	543	592	617.5	485	1361	9	118	206	647	0	2	23.5	163.5	311.17	10.5	1255.5	1	93.5	671
2:30 AM		110	0	2.5	73.5	104	1	314	5	24	161.35	135	55.5	317.67	292.5	36.5	145	3	672	289.45	315.5	189.5	665.67	0	363.5	341.5	40		9	1409.5	653.17	710.67	227	713.17	1268	143.5	2	341.17	359.5	1	2	23.5	268	36	15.5	1944.5	4	48.5	624.17
2:45 AM		39.5	63.17	10	2	0	65	493.5	26.5	24	13.5	221	0	254.5	168	23.5	368.5	3.5	504	76.5	283.5	144	602.5	51	401.5	265.5	67.25		64	1567	730.67	624.67	326.1	501.5	1622	567	56.5	277.5	316.5	15.5	32	8	358	4	127.5	796	18	3	1096.5
3:00 AM		1.5	2.5	8	0	151	93	385	2.5	283	0	159.5	12.5	242.5	336.17	286	5.5	0	658.83	215.52	360.5	47.5	303.5	40	270	485	255		194.5	1432.33	562.5	350	263	357.5	1266.83	363.5	523.5	248.5	62	0	4.5	37.5	165	22.5	155.5	1629.67	47.5	0	547
3:15 AM		2.5	0	135.5	2.5	435	75	372.5	0	339	97.08	247.17	42	43	602.5	316.5	3	0	533.5	568.33	244.5	269.5	245.5	382.33	302	142	177		199.5	1513.5	572.33	213.67	4.5	596	1410.83	412	84	229.5	0	5	0.5	380.17	101	36	157.5	1361.67	78.5	0	864.17
3:30 AM		36	36.67	355.5	1.5	168.5	64.5	33	91	153	1	0	67	12.5	25	14.5	2.5	29.5	616.67	124.17	319	159.5	272	534.67	375.5	151	597		350.5	1628.92	748.5	12	11	432.5	1517.5	552.5	389	307	30	5	9	171.17	186	56.5	19.5	1273.67	23.5	6	121.5
3:45 AM		22	81.17	91	221.5	40	12.5	0	135.5	211.5	2	6	78	51.5	483.5	4	31	61.5	635.5	3	133.5	172	296	383.17	179	88	517.5		96.5	1214.83	393.5	0.5	0	19	925.17	328	100	264	482	281.5	3	206.17	102	20.5	2	1271.5	2.5	31	119.5
4:00 AM		2.5	5	219.5	278.5	265	30	0	56.5	20.5	4	2	129	24	275.67	159.5	26	254	584	31.85	279.5	139.5	212	167.17	120	34.5	357.17		23	371.5	421	7	8	23.5	1162	484	0	52	667	436	3	33.5	110	266.58	0	1073.5	17.5	16	0
4:15 AM		21	91.4	68.5	14	12	25	25.5	28.5	9	33.1	15	121.5	22	9.5	243.5	5.5	139.5	753.5	6	165	56	110.5	330.83	289	174	310		4	712.87	23.5	2	0.5	84	1430.67	109.5	30.5	17	557.5	366.5	4.5	220	149.5	215.67	0	1012.5	247	400	13
4:30 AM		0	0	5.5	1	3	8	0	177.5	8	15.5	14.5	94	41	25.5	34.5	28	260	475	18	187.5	105	9.5	362.17	341.5	241.5	330.5		16.5	1382.5	1	252.83	23.5	50.5	1331.67	46	16.5	1	193	374.5	195	314	212.5	19	0	740.5	479.67	329.5	4.5
4:45 AM		1	0	2	3.5	0	140	49	177.5	226.5	409	20.5	169	3	208	20	2.5	124.5	570	92.85	1	1.5	28	193	25.5	1	233.5		172.67	1041.67	182.5	169	260.5	12	837	9.5	174	0	10.5	246.5	85.5	109.5	138.5	67	1	809.17	619.5	455.07	9
5:00 AM		62	42.33	6	202	21.5	46	346.5	44	583	369.33	13.5	39	15	1.5	30.5	290.5	171.5	620.67	2.5	19	44	72	5	0	21	29.5		276.5	1059.83	140.5	345	266.5	30	1059.92	16.5	586.5	151	157.5	299.5	7.5	151.5	198.5	213.92	75	34	405.17	272	109.33
5:15 AM		20.5	1	181.5	258	250	21	284.5	0	420	283.5	42	52	22	18	72	528	4	704.5	111.22	0	0	163.5	46	21.5	23	3.5		139	1017.83	623	597.17	152.5	75	921	63.5	670.5	217	436.5	315	5	86	182	3	29.5	35.5	615	296.17	4.5
5:30 AM		69	1	143.5	3.5	231.5	32.5	437	27	476.17	77.5	90.5	0	189	122	298.5	587	1.5	716.67	199.8	0	9	584.17	0	231.5	24	23		166.17	872	854	403	27	50	1497.17	366	8	26.5	119	221.5	21	3	183.5	35.5	0	40	409.5	319	0
5:45 AM		154.5	0	83.5	0	113	58.5	21	288	150	1.5	153	0	171	312	360	194	0	662.5	476.95	32	16	482.67	10.5	61	55	2.5		7.5	1174	875.17	718	0	31	1318	350	1	27.5	0	4.5	88.5	1	41.5	232.5	60.5	0	573.67	403.5	8
6:00 AM		14	94.83	1.5	12	8.5	22.5	0	287	14.5	68	165	30.5	32	213	33	34	24.5	837.67	718.68	355	0	433.5	239.33	400.5	16	48.5		9	1593.5	779.17	447.83	2.5	29.5	1438.55	164	26.5	0	0	0	446.5	23	68.5	18	134.5	2	524.17	604.58	2.5
6:15 AM		0	464.17	0	34	6	69	0	18	3	209	180.5	1	135	264	21	29.5	2	656	396.83	415	101.5	349.67	343.33	282.5	95	0		13	1046.97	596	586.5	74	67	1420.83	103	36	8	2	24.5	282.5	23	116	5	144.5	8.5	444.17	333	557.67
6:30 AM		6	161.5	5	0	5	14.5	2	1.5	4	163	216	104.17	309.67	404	1.5	1	13.5	166	155	223.5	118	406.5	506.17	371.5	306.5	10		0	759.33	1021.83	704.5	245.5	436	1487.67	4	10	6	42	2	316	0.5	45.5	0.5	0	321.5	382	246.5	1069.17
6:45 AM		13	101	8	0	2	0	34.5	6.5	3	2	210	147	22	4	9.5	19.5	41.5	5	74.8	313	114	7.5	165.17	139	282	202.5		77.5	30.5	633.5	359.5	230.5	533	1266	3	63.5	37	107	2.5	218.5	33	66	5.5	0	666.5	505.5	18	651
7:00 AM		0	24	30.5	4.5	41	44.5	201.5	2.5	72	0	182.5	190	17	66	28.5	34	89	15	367.2	251.5	52.5	64	102.5	324	271	219.5		152.5	880.67	950.5	624.75	249	503	1425.67	28.5	1.5	6	2	27.5	58.5	165.5	181.5	51.5	0	152	331.17	4.5	725.5
7:15 AM		62.5	21.17	15	0	6.5	20.5	6	1.5	0	1	278.5	199.5	30	0	1	0	198.5	36	4	102.5	35	136	0	56	207.5	199		267.17	1023.33	444.17	523.5	59	8	1321	164	0	14	0	127.5	12.5	211	79	3	2	0	154.5	81.5	482
7:30 AM		62.5	7.67	8.5	0	1.5	45	2	30	0	12.5	195	17.5	1	0	6.5	0	203.5	251	0	266	0	115.5	28	0.5	7	51.5		252	233.5	114.5	469.5	0	26	1082.5	356	0	37	0	1.5	0	39	211.5	0	1	4	2	3	324.67
7:45 AM		0	42.33	69.5	2.5	0	0	3	0.5	0	161.33	47.67	23.5	8.5	58.5	1	35	9	171.5	0	216.5	0	0.5	0	3.5	0	3.5		357.5	2.5	4	166	3	451.5	146	295	153.5	19.5	49	71	27	3	202	10	81	23.5	3.5	41	54
8:00 AM		0	113.67	93.5	210.5	5.5	0	0	3	7.5	5.5	0	106.5	99	205.5	21.5	0	1.5	161.67	2.5	1	4	31	17	4	0	63		251	1	3	0	41.5	586	2	31	157	0.5	286	31	14	26	154	21	2	0	102	51.5	0
8:15 AM		100.5	0	13	7.5	10.5	13.5	15.5	5.5	522	2.5	27	3	6.5	0	3	2	0	10.5	4	0	18	18	41	139	17	9.5		97	4	4.5	2.5	155.5	478.5	254.17	7	28	6	97	5.5	1.5	0.5	3.5	2	2	2	0	0	0
8:30 AM		48.5	31.83	50	0	187	24	151	2.5	384.5	0	53.5	9	30.5	0	9.5	122	0	0	152.97	0.5	13	28.5	0	5.5	1	79		23	20	4	19.5	83	348	650.5	26.5	3	146.5	1	0	1	0.5	9	99.5	1	13	10.5	8.5	43.5
8:45 AM		0	9.75	53	0	231	29	2.5	1	205.5	1	0	10	27.5	4	10.5	361	1	4.5	5	0	2	34.5	1.5	1	69.5	1.5		11	205.5	4	0	0.5	488.5	917.92	205.5	0	298.5	7	48	47.5	9.5	46	6.5	0	361.5	1.5	8	79.5
9:00 AM		0	57.42	6	0	20.5	34	0	3	26	3.5	2.5	0	6	0	2	214	0	4	0	33.5	1	0	0.5	56.5	191.5	236.5		4.5	416.67	117.17	0	0	558	1050.17	92.5	0	361.5	5	18	232.5	1	6	2	0	76.5	0	11	1
9:15 AM		0	4.33	6	84	1	6.5	0	70.5	5	152.92	49	9	5	0	14	10.5	22.5	51	8	1	3.5	2.5	62	13	141.5	111.5		51	5.5	5	4	6.5	85	267	5	0	46.5	9.5	1	44	110.5	3	1	16	1	0	6	0
9:30 AM		25	12.5	4.5	11	0	0	3	19	3	115	0.5	28.5	52	8.5	110.5	0	36	44	1.5	2	37	5	6	2.5	44.5	20		159.5	2.5	3	1	3	35.5	6.5	2	29	10	392.5	0	2	139.17	4.5	3.5	28	7.5	0	1	9.5
9:45 AM		0	4.33	0	1	2.5	0	2	0.5	42.5	10	0	87	15	65.5	301	1.5	88.5	0	5	2	35.5	3	0	0	0	4		53.5	2	4.5	1	3	2.5	44	2.5	8	28.5	41	1	1.5	174.5	4.5	42	2	0.5	13.5	104	110.4
10:00 AM		0	29.25	4	2	100.5	51.5	21	0.5	150.5	0	3.5	5	1	32	353.5	26	59	0.5	4	1	2	0	33	0	32.5	39.5		2.5	1.5	4.5	279.83	3.5	354	41	144.5	0	4.5	7	83	2.5	38	120	54.5	0	5	1	364.67	99
10:15 AM		3.5	168.25	62.5	3	1.5	28	16.5	34.5	18.5	0	105.5	8	1	2	110	7	82	26	0	0	0.5	0	32	7	5.5	17.5		4	2	69	474.67	16.5	72.5	104	18	64.5	15.5	4.5	80	0	8	2	0	4	0	3.5	57	0
10:30 AM		93	150.17	167	115.83	0	8	234	95.5	23.5	0	98.5	34.5	4	0	10	4	18	62.5	322.68	0	9.5	103	4	29	0	2.5		1	2.5	28.5	203.17	127	14	445	0.5	127.5	5.5	0	2.5	11	93	2	0	1	203.5	64	2.5	2
10:45 AM		48	30.5	10	285	0	65	77.5	1	135	116.75	5	1.5	5	0	0	96	3.5	2	70.58	128	5	7	0	347	4	5.5		23	52	1	76	249	9.5	1061.5	0.5	608	25.5	7.5	2.5	25.5	69	1	103	0	284	383.5	6.5	0
11:00 AM		1.5	0	1	304	7.5	69	0	1.5	54	0	1	0	80.67	21	3.5	7.5	1	0	47.5	49	192.5	0.5	2.5	317.67	177.5	87		145.5	373	3	11.5	30	18	880.67	28.5	182	67.5	85	19	2.5	58.5	113.5	30	0	7.5	60.5	11.5	17.5
11:15 AM		0	0	6.5	204	59	19.5	0	0	30.5	0	96.5	9.5	12.5	0	30.5	11.5	2	0	3	0	99.5	0.5	51.83	59.5	18.5	11.5		106.5	10	2.5	8	0	98	45	130	18	5	114.5	254	5.5	4	5	0	0	1	7	75	57
11:30 AM		1.5	22	203	4	3	7	0	3	6.5	1	0	60	10.5	141.33	21	5	0	3	1	4	183.5	3	0	0	1	55.5		3	0	5	8	1.5	31	0	5	0.5	57	87.5	164.5	0.5	2	1	6.5	0	0	0	28.5	126.5
11:45 AM		0	49.67	104	0	1.5	4	2	0	14	36	0	6.5	52	50	2	106	4.5	147.5	4	73	29.5	115	2	7.5	7.5	2.5		17	2.5	3.5	12.5	1	21	0	0	5.5	320	0	2.5	76	4.5	71.5	4	0	219	3.5	1.5	48
12:00 PM		0	0	9.5	0	22.5	44.5	0	0	23.5	6	34	0.5	3	0	71	12.5	32	202	64.75	1	0	35	51	6	126	16.5		0	5	94.83	5.5	54.5	15.5	2	0	192	86	3	19	5.5	86.5	1	25	6	12	12.5	10.5	0
12:15 PM		0	0	1	42	74	6	15.5	3	127.5	0	53	0.5	3	0	189	0.5	183	35.5	0	0	5	22.5	2.5	3	59.5	8.5		4	2.5	236.5	132.67	158	27.5	5	5	21.5	1	25	3.5	6.5	0.5	1	227.17	0	0	39.33	0	2
12:30 PM		16	5.33	6	172.17	1.5	1	0	22.5	2	7	13	5	30	2	10	3	128	4.5	5	1	0	0	2	3.5	5.5	50.5		15.5	153.17	41.5	493.5	123	166	2	0	0.5	2	0	19.5	0	0.5	0	14	141	143.5	4.5	2.5	0
12:45 PM		0	0	14.5	98.17	1.5	42.5	79	8.5	2	3	1	13	95	37	5.5	0	7	19	63.03	2	11	5	4.5	6	15	6		130	7.5	11.5	186	0	100	0	24.5	56.5	1	49	1	24.5	31.5	30	1	145	5	0.5	26.5	3
1:00 PM		0	135.83	3.5	25.5	15	39	0	1	17.5	0	1	173.5	79	0	42.5	6.5	0	0	143.23	91	1	2	2	73.5	2	37		59	8	4	40	0.5	12	192.67	119	74.5	15	8.5	3	16	91	0	0	5.5	6	0	345.5	113.17
1:15 PM		38.5	112.33	10.5	0	50.5	2.5	2	1	126	36	2.5	20	18.5	0	3	134.5	0.5	0	25	0	43	2.5	1	101.5	53.5	178.5		0.5	2	4	8	1	16	15	5.5	3	6	6	27.5	208.5	0	8.5	3.5	20.5	0.5	4	21.5	2.5
1:30 PM		64.5	0	105.5	0	45	8	7	6	0	5	55.5	13	41.5	0	11.5	4.5	32.5	0	2	1	0	2.5	70	0	6.5	33.5		10.5	150.5	0	7	2.5	16	1	0	0	2	305.5	78.5	9.5	1	8	0	0	2.5	89.33	0	17
1:45 PM		162.5	1.67	174	6.5	1.5	8.5	196	32.5	0.5	1	18.5	1	5	0	6	1.5	153.5	73.5	68.42	2.5	3	103.5	33.5	2	0	10		0	83.5	13.5	9.5	77	14	12.5	0	28	35	203	0	0	3	1.5	52.5	0	13	190.17	0	2.5
2:00 PM		4.5	134.63	196	1.5	2	14	68.5	4	36.5	1	0	4.5	1	9	29.5	4	2	0	0	11.5	142	34.5	3	0.5	2.5	2		0.5	4.5	2.5	30	111.5	66	99.5	0	0	0	15	3.5	2.5	0	59.5	4	1.5	134.33	31.5	13	5.5
2:15 PM		0	0	45	2.5	0	84	5	0	17.5	3	0	6.5	28	208.92	7.5	45.5	2	0	0	0	3	0	3	3.5	19	17.5		52.33	1.5	0	193.5	6.5	24.5	911	92	0	4	5	0	0	132	4.5	0	2	481.5	1.5	26	5
2:30 PM		2	2.67	49.5	0	0	62.5	3	2	6.5	47.5	7	26.5	24	252.33	9.5	411.5	1	0	23	0	3	3	0	27.5	151.5	381		106.67	2	16.5	296	1.5	4	1145.9	58	2	43	6	4.5	16	294.67	51	0	4	26.5	0	3	72
2:45 PM		20.5	5.33	11.5	0	0	25	1	2.5	2.5	138.33	3	145.83	5	32	4	325	17.5	77	91.8	20.33	32	1	25.5	282.5	2.5	130.5		6.5	4.5	3.5	34.5	0	22	1232	0.5	98	22	50	125	67.5	246.5	1	21.25	1.5	9.5	24	5.5	581
3:00 PM		0.5	10	7.5	90	20	0	0	3.5	152	11	15.5	29.5	2	2	91.5	584	47.5	36	372.18	12	3	44	2.5	47.5	0	111.5		2	47.5	0.5	3	0	3.5	115.5	2	394.5	167	6	194.5	9.5	144	2.5	34	143.5	1	0	7	353.83
3:15 PM		14.5	77.83	6.5	294	16.5	0	26	98	64	2	19.5	8	34	0	385	256	71.5	3.5	46.92	205	0	0	0	6	10	8.5		5.5	316	5	6.5	0	33	2	6	586.5	90.5	2	323	0	13.5	50	27	87.5	18	0	42	135
3:30 PM		0	147.27	3.5	131	112	0	3.5	11	16	0.5	0.5	5	63	2	229	397	0	2.5	283.97	311	2	2.5	28.5	2	13	0		34	42.5	37	8	4	23.5	2	110.5	278.5	2.5	24	42.5	2	207	247	193	4	0	7.5	238	86
3:45 PM		0	7	64.5	180	65	0	2	0	32.5	11	1.5	9	5	4	2	493	1	2.5	2	119	20.5	2.5	202	0	39	80.5		146.67	0	222.17	4.5	9.5	37	10	59	155.5	8	348	11	69.5	126	105	234.33	1	3	20	150.5	1.5
4:00 PM		1.83	0	7.5	0.5	0	0	0	10	29.5	27.5	37.5	18.5	4	33.5	31	131.5	4.5	0.5	0	55.5	86	1	155.17	2	8.5	1		1	1.5	146	16	17	7.5	31	0	0	79	363.5	1	338	13	0	258.33	0	27	4	52.5	2
4:15 PM		0	0	0	0	3.5	33	27	97	57	0.5	4.5	93.5	38	127.5	0	10	13	29	5.5	24	43.5	6	359.17	131.83	0	1		0	7.5	69	286	1	63	730.67	7.5	0	0	350.5	38	362	74	10	27.5	2	150.17	97.5	7.5	0.5
4:30 PM		41.5	7.5	117	4	12	30.5	43	0	273	6.5	44.5	78	4	0	6	3	197.5	88.5	14	0	0	136	29.5	12.5	9	2.5		1.5	24	10.5	509.5	1	362.5	478	135.5	90	1	224	0	288	4	30.5	1	59.5	136	182	8.5	67.5
4:45 PM		7.5	3	215.5	2	20.5	4	300	2.5	444.5	0	8	5	4	0	18	6	446	23	62.72	10.5	57	17	0	6	26	27.5		1	104.5	0	621	7	393.5	35	364	422	5	115.5	90	268.5	2	3.5	7.5	0	2	105.5	48.5	1.5
5:00 PM		85.5	44.5	81.5	96.5	104.5	13.5	190.5	11.5	79	106.5	5	10.5	46	4	45	84.5	248	94	1.5	15.5	4	63.5	4	12.5	2	66.5		8	2	4	396.5	235	383.5	2	126.5	13	24	6	64	102.5	72	23	20.5	0	38.5	0.5	2	0
5:15 PM		106.5	0	94	3.5	0	12.5	10.5	2.5	37	23	5.5	5.5	15.5	0	90.5	50.5	139	0.5	156.37	34	18.5	0	0.5	222.42	27.5	14		7	1.5	2	221	210	302	81	121	4.5	26	10.5	5	0	7	21.5	2	5	0	2	35	4
5:30 PM		0	7.67	11	1	2	0	2.5	6.5	36	2	57.5	36.5	25.5	23	39.5	16	1	1	512.75	2.5	7.5	0	17.5	44	16	8.5		0	13	2	226.33	6	295.5	6	54	90	114.5	155.5	27.5	24	6	0	59.5	1	14	2.5	58.33	30
5:45 PM		0	38.63	5.5	0	39.5	62	22.5	45	23	14	1	48.5	5	122	32	159.5	27.5	2	491.57	0	3	3.5	33	4.5	7	100.5		52.5	177.67	49.83	4.5	0	63	0	0	227	181.5	403	3	42	34	2	17	0	73.5	62	42	0
6:00 PM		19	1.33	2	42	10	6.5	8.5	18.5	77.5	81	11	5	62.5	38	42	280	253	79	515.25	1	65.33	21.5	1	8	12	9		8	246.5	210.5	1.5	5	6	4.5	13.5	600	17.5	449.5	214	22	415.67	31	148.83	20	18	0	0	103
6:15 PM		1.5	11.33	9	6.5	15.5	37	28.5	0	94.5	19	9	10	6.5	0	24	125.5	293.5	2	91.03	186.83	0	219.25	0	99.5	178	1.5		2	79	3.5	6	25.5	4.5	59	35.5	563	228.5	388.5	60.5	7	103.5	20	7	1.5	0	5	11	406.67
6:30 PM		0	109.5	10	136.5	143	36.5	17	18	121	44	71.5	14.5	37.5	15.33	188	82.5	82.5	2	64.67	63.5	1	4.5	25.5	9.5	299.5	23.5		13.5	0	2.5	151.5	43	22.5	56	11	717	141.5	383.5	233	15	320.17	68.5	7	57	0	25	7.5	726.5
6:45 PM		102.5	53	231	274	83	65	11.5	135.83	241.5	230	157.5	35.5	185.5	137	310.5	525	401.5	2	28.83	3	48.5	0	359	2	68.5	83		368.67	2	39.5	346.67	0	271	58	50	588.67	259.5	382	255	217	324.33	220	153.5	168	361.5	8.5	75.5	7.5
7:00 PM		289	277.63	361.5	278.5	382.5	134	355.5	282	456.5	712.32	226	6	412.67	116	278.67	367	214	130	557.62	397	237	285	321.17	63.5	51.5	19.5		195	40	300.5	480.83	19	501.43	496.33	249	783.5	232	560	209	403	430.5	159	414.83	225	377	45	417	28.5
7:15 PM		359	255.93	363.5	310	506.5	133.5	611	389.5	537	1021.1	115.5	80.5	511.67	442.5	303.5	632.5	236.5	426	934.25	433.5	217.5	438.5	374.67	416	261.5	157		406.5	271.67	578.5	692	234.5	372	1395.83	445.5	612.5	217	675.67	304	325	564.5	175	380	241	675.33	227.5	356.33	620.9
7:30 PM		190	404.63	285.5	263.5	324.5	65	512	553	491	613.68	190.5	91	504	93.5	252	575.5	435.5	463	696.38	364.5	241	235.5	416.83	445.5	339	232		256.17	27	333	709.67	477	348.17	1038.83	538	697	186	438	317	276.5	503	293	450.5	191	855.5	629.17	408.5	751
7:45 PM		175.5	151.13	305	170.5	452	56.5	493.5	467	495.17	596.85	115	8	393	463	212	605	406.5	550.5	816.85	312	249	347	185	243	379	516.5		263	16.5	259.5	545.33	476	330.5	1446.8	527.5	614	202	584	232	347	491	185	549.17	121	909	320.5	404	928.83
8:00 PM		250	19.5	304	242	498	53	597.5	341.5	490.5	626.02	275.75	141.5	456	158	230	630	95.5	381	814.82	304	222.5	217	476.5	27.5	405.5	337.75		291.5	554.03	449	580.5	359	467.5	1009	489	670	255	359	343	404.5	524	303.5	350.17	100.5	1237	427.83	360.5	841.33
8:15 PM		125	33.33	193	346	436.5	16	393.5	478.5	633	648.77	112	55	460	197	223	625.5	525	701	1182.3	299.5	274	32	322.17	372	324.5	533.5		100	424.67	611	691.17	320.5	574.5	1120.83	288.5	397	257	440	215	421	383	249	649.5	0	414	229.5	329.33	697
8:30 PM		145	37.2	292.5	243.67	457	81	274.5	558	454	703.82	133	17	470.5	47.5	259	690.5	369	644.5	1312.8	278.5	258.5	85	344.17	431.5	391.17	522		0	78.5	446.17	562.67	317.5	213	1027	775.5	887	244.5	760	192	178	190	133	462.67	53.5	1174	448.17	191.5	748.5
8:45 PM		60.5	10	28.5	261.83	400.5	6.5	347	109	285	637.78	176.5	53	362.5	185.5	468.5	576	338	283	573.7	262.5	161.5	625.33	44.5	208.5	310.5	391.67		10.5	20.5	187.5	550	434.5	15	1256.5	334	832	363.5	410	171.5	295	408.67	386	248	82	786	288.17	257	732
9:00 PM		33.5	8	133.5	150.5	329	71.67	522	457	435.67	936.13	126	7	442	6	288.5	692	583	596.67	1067.1	361.5	218	495.25	17.5	264.5	240	619		68	343.5	344.5	510	308.5	159.5	1126	711.5	592	258	584	302.5	396	286.5	163.5	193.5	4	1245	223	477.5	1063.17
9:15 PM		41.5	72.67	34	10	211	38.5	363	511	250.5	100.5	39.5	48.5	429	2	347.5	572.5	430.5	242	695.7	182.5	251.5	318	60.5	154	43.5	305		236	393	331	217.5	459.5	474	1037	380.5	782	246.5	612.5	136	376	271	196.5	15.5	192.5	805.5	407	63.5	377.67
9:30 PM		16	60.73	6	114	230	114	334	220.5	249	937.52	12	14.5	210	11.5	309	507.5	441.5	579	1007.28	279.5	208.5	367.5	2	17	75.5	591.92		97	140	362.5	663	574.5	581	1209.67	690.5	478	297.5	438.5	299	361	448.5	285	136.5	160	1210	178	481	970.07
9:45 PM		33.5	404.67	79.5	179	307.5	50.67	344	392.5	463	852.03	191	54	146	189.5	174	560	395	558	985.23	136	101.5	319.5	33	6	56	544		13	39	450.5	615.33	267	390	775.5	234	594	256	453.5	441	208	360.5	19.5	418.82	183.5	1176	379.17	465.5	497.17
10:00 PM		9	475.17	307	258.5	301.5	54	275	186.5	206.5	287.48	94	42	171	270	338.5	655	528.5	35.5	490.12	9	321.5	373	2.5	365.5	2	392.5		56.5	15	641.17	763.5	373	312	1387.17	100	454.5	177	526	250	399.5	432.67	143	253	175	1001	237	352.25	800.17
10:15 PM		98	120.67	212	123.5	278.5	15.5	461	377.5	468	37.5	239.5	109	75.5	319	184	572	312.5	16.5	762.05	167	220	268	224.5	390	49	720		421	104.5	496.5	670	314	0	1404.83	56	379.5	323	695	8	333.5	308	159	9	201	1393	7.5	470	815.5
10:30 PM		56	312.25	195	54.5	137	36.5	433.5	312	492	112.33	188	208.5	58.5	36	79	661.5	536	211	529.25	96	241	346.5	405.17	9.5	177.5	573.67		317.5	596.5	287	879	296.5	172.5	1221.5	24	567	329	573.5	75.5	305	314	32	0	165.5	1102	30	530.5	906.83
10:45 PM		26.5	53.58	33	0	31	0	364	268.5	139	618.92	179.5	128.33	28	306	31	646.5	239.5	639.5	647.13	0	242.5	289	82	8	467.5	304		286.5	91	620	724	522	309.17	874.67	105	652.5	191	447.5	383	268.5	190	88	33.5	176.5	890	304.5	540	647
11:00 PM		41.5	27.33	14	3	0	1.5	222	88.5	151.5	774.57	308	348.17	118	57	26	499.5	481.5	610.5	199.12	2	196.5	179	7.5	115	554	538.67		115.5	501.67	366.5	471.17	523.5	518	937	40.5	491.5	274.5	445.5	410	342.5	0	225.5	1	165	1387	196.5	392.42	598
11:15 PM		22.5	93.17	183.5	178.5	23.5	5	196.5	90.5	248.5	558.12	92	132	276	5	21	691.5	339	288	294.78	112	235	99	77.5	324	196.5	348.5		315.5	1096.33	261	875	562	481	699	40.5	450.5	127	387.5	285	400	237	82	15	213.5	1153	408	735	795
11:30 PM		54.5	2.67	239.5	218	204	45	218	2.5	86	789.35	237	160.5	360.5	3	35.5	597.5	296.5	497.5	102.5	70	303	158	454.67	254.5	129.5	518		179.5	666	175.5	607.5	630	121	1004.5	0	524.5	6	379.5	293.5	226	117.5	118.5	16.5	12.5	1380	359.17	448	625
11:45 PM		155.5	1.33	122	259.17	269	47.5	318	2	48	55.37	249	99	356.5	94	15.5	615.5	320	427.5	45.57	99	145	316.17	378.83	198.5	77.5	187.5		160	1116.83	231.5	761.5	513.5	240	854.95	37.5	618.83	0	291	241	316.5	154.5	408.5	232.5	2	1228.5	433.17	16.5	340.5
12:00 AM		388.33	6.67	91	15	307	46	7.5	13.5	22.5	8.17	70	187	202	182.5	189	522	20.5	556	38.5	0	301.5	452.5	379.17	291.5	148.5	377.67		319.5	668.83	307.67	618	481	552.5	884.5	78	390	87	269	327.5	374.5	296	367.5	427.5	0	1222.5	405.5	120.42	397
12:15 AM		228.5	21.67	15	104	205	3	62	59.5	31.5	182.6	8.5	241	58	192.5	228.5	601	1	544	3	10	162	163.5	226.5	411	15	436.5		47.5	1413	521.5	1009.33	215	292	712	169	838.5	2	315	231	228	234	423	268.5	22	1055	236	7.5	399.5
12:30 AM		278	100.33	10	77	331	0	6	318.5	237	63.68	22	13.5	229	376.67	400.5	524.5	0	691.5	11	1.5	152.5	15	10	55	2	202		1.5	1322.83	639	663.5	55.5	312	995	458.5	555.5	86	165.5	26	181.5	258	336	220.57	9	1230	170.17	460	61.5
12:45 AM		185	319	46	26.5	68.5	0	15	361	414	58.6	16.5	77.5	303.5	93	312	319.5	24	57.5	0	132.5	330.5	25.5	1.5	254.5	26.5	24.5		4	406.5	106.5	518	2	501	895.17	549	592	9	2	80	27.5	52.5	323.5	100.83	165	759	105	388.67	273
1:00 AM		240.5	19.67	5.5	27	59	6	85	132	413.67	7.67	28.5	7	17.5	140	319	505	162	148	369.45	277	31	56.5	44	163	216.5	42.5		114	1183.83	539.5	748.5	2	604	742.4	516	478.5	233	0	8.5	20.5	25	272.5	100.5	187	1089.5	59	436	285.67
1:15 AM		9	63.53	24.5	4.5	48	10.5	13.5	308	209	19.5	117.83	0	44.7	0	168	393	54	500	642.7	84.5	93.5	35.5	13.5	2	13.5	0.5		188.5	1419.5	668.5	561.67	2	399	839	368	549.5	280.5	154.5	154.5	237.5	0.5	155	4.5	190.5	1053	4.5	105	259.83
1:30 AM		65	13.33	218	2	8	67.5	329	116.5	94.5	8.67	100.5	82.5	47.5	65	273	32.5	2	446	677.97	25	12	302.25	31.5	11	209.5	31.5		173.5	330	128	8	219.5	433.5	893.17	700.5	496	198	208.5	0	413	13	101	3.5	241.5	1157.83	51.5	98.75	129.5
1:45 AM		7.5	25.67	299	1	8.5	72.5	447	66	68.5	5.83	186.5	8	2	79	32	15.5	2.5	83	606.67	16.5	18	414.5	325	12	442.5	95.5		192.5	304	558.17	104.5	406	397.5	573.5	602.5	60.5	190.5	314.5	0	30.5	20.5	61.5	45.5	81	713.5	0	35.5	469.5
2:00 AM		1	4	146	4	1	52	460.5	26	14	158.52	131	95.5	15	130	0	1	2	220.5	594.98	201.5	14.5	477.5	400	0	522.5	0.5		259	146.5	445.67	282.5	307.5	632	828.83	146	0	234	2	57	159	22.5	157	1.5	325	578	23	0	215
2:15 AM		34	2	97.5	152	2	30.5	104	1.5	21	236.88	120.5	27.5	22	177	44.5	2	194.5	74.5	215.58	94.5	26	415.5	302	44	374.5	30		141	67	83	1028.5	368.5	532.1	1036.67	59	273	243	0	407.5	752.5	17	10	150.67	190.5	532	20	0	100
2:30 AM		191.5	131	25	355.5	144	22.5	180	4.5	76	11	73.5	61	3	23	5	6	145	133.5	374.25	49.5	23.5	448.5	198.67	255.5	216.5	3		178.5	8	0	600.5	325.5	201	959	191.5	358	109.5	32	239	545.5	5	12.5	0	302	585	9	12	0
2:45 AM		9	8.17	9	206	120	2	108	3.5	380	4.33	2.5	1	18.5	211	33.5	436	539	18.5	31	1.5	117.5	105.5	368.17	340	439	22		118	2.5	9.5	833.33	233	315	1038.5	42	443	13.5	5	128	261	0	11.5	6	382.5	53	25	4	5
3:00 AM		31.5	0	2.5	211	373	38	32.5	14.5	200	65.62	0	33	81.5	406	33	451.5	358.5	2.5	0	0	216.5	105	107.5	309	27.5	0		4	787.67	2.5	744	79.5	4.5	793.5	51	162.5	1.5	0	86	212	45	28	389.83	12.5	277	73	2	43
3:15 AM		276.5	19.47	60	249.5	221.5	7.5	249	21.5	189	6	5	7	363.5	96	0	238.5	139.5	5.5	0	5.5	78	9	153.33	359.5	149.5	3		14	1393	66.5	602.67	6.5	11.5	904.83	4.5	0	6.5	34.5	2	8	79	22.5	214	2	5	382.67	0	340.5
3:30 AM		0	0	2.5	2	112	145	5.5	31.5	318	5	74.5	5	199.5	523.67	36	68.5	457.5	209	175.35	9.5	244	19	12.5	195	47	158		4.5	1238.67	1	752	3	49	920.5	0	0	102.5	523.5	0	82	1	4.5	15.5	7	7	455	36.5	833.67
3:45 AM		0	3	6	1	0	109.5	43.5	0	262.5	264.88	3	16	215.17	419.5	0.5	22.5	172.83	480.5	157.17	32.5	167.5	29.5	18.5	20	0	5		0.5	282.33	66	487.67	2	0	390.5	15.5	0	0	370.5	31	15	78	65	3.5	15	2.5	410.17	3	792.17
4:00 AM		102.5	5.5	25	3.5	0	44	211	0	167	600.27	0	8	24.5	141.17	5.5	48.5	79.5	481.5	724.7	333.5	206.5	35	229.5	281.5	29.5	76		113.5	256	631	85	140.5	24	3.5	28	1.5	117.5	613.5	46	0.5	4	110	0	12	154.5	358.5	14	867.67
4:15 AM		2	35.57	308	1.5	28	24.5	132	83	13	653.85	2.5	4	16.5	3	3	26.5	224.5	607.5	460.6	182	146	0	238.67	246	0.5	5		240	308	606	9	256	32	326.83	4.5	228	41	236	16	0	46	200.5	8	4	842.17	409.33	432	408.17
4:30 AM		0	64.25	89.5	1	2	75.5	387	314	0	551.88	7	16.5	51.5	30	287	7	2.5	316	250.05	84	65.5	128.5	371.17	13	36	3		76.5	257.17	464	4.5	54.5	120	888.83	37	473	85	69	167	3	233	312.5	12	4	476.17	312.33	213.5	502.67
4:45 AM		0	149.92	262	0	0	57.5	288	354.5	35.5	228.9	24.5	104	0	137	284	265	2	177.5	57.25	204	1	38	219.5	2	96.5	31		269.5	463	399	0	68	446	368	5	332.5	6	173	333.5	91	382	227.5	237.67	169	398	285	344.67	386
5:00 AM		11	305.33	55	146.5	97	101.17	36	124.67	23.5	0	20	101.83	90.5	7	200	368.5	0	13	1.5	131	0	52	1.5	1.5	0	4		131.5	411	534.5	6	0.5	385	990	8.5	389.5	35.5	3.5	144.5	229.5	145	315	121.83	175.5	224	142	182	332
5:15 AM		56	152.67	15	147	135	40	2	127	244.5	0	249	57	199.5	1	363	283.5	6.5	54.5	0	3	78	27	28.5	1	0	181		31	348	639.83	44.5	1.5	501	1068.5	30	3	261.5	1	50.5	311	55	240	11	325	74.5	446.83	10	49.5
5:30 AM		0	7.33	2.5	0.5	512.5	2	67	73.5	524.17	192.62	212.5	130.5	159.5	1	42	191.5	23.5	72.5	0	1	5	577.5	2.5	80.5	244.5	536.5		8	39	593.17	424	2.5	80	1191.67	379	0	396	8	0	326.5	226.5	270	4.5	94.5	7.5	450.17	129.5	1
5:45 AM		39	2.67	2.5	113	226	0	379	1	367.5	29.17	185	19	24	28	9	80	89.5	250	87.97	100	2.5	725.5	44.5	462	438.5	632		61.5	135.5	459.17	1079	54.5	55.5	1005.33	210	0	301.5	0	32.5	312.5	308.5	20.5	24.5	0	0	292	313.5	0
6:00 AM		273	89.47	181	456.17	39.5	75.67	331.5	2	455	90.87	233	0	64.5	46	12	4.5	183	397.5	470	293	148.5	571.5	30	552	379	464		2	1158	458.67	653	316	30.83	1493.83	391	246	251	187.5	3	342	93	28	0	1	638.75	9	406.5	37
6:15 AM		89.5	10.67	221.5	58.67	183.5	77.5	235.5	16	334.67	627.2	196	25	31	202.5	51	92	2	397.5	90.08	261	168	206.5	254.5	176	288.5	317		48	1123.17	593.17	693	212.5	264	1217.25	171	58	14	575.67	2	190.5	138	2	120.83	1	768	8.5	135	760.67
6:30 AM		133.5	18.08	27.5	33	255.5	1	28.5	222	109.5	203.17	209.5	4.5	2.5	189.5	31	2.5	0	104	288.32	212.5	144.5	139.67	530.67	350.5	349	544		1.5	938.5	550.5	781.5	248	318.5	1071.83	153.5	0	0	532	0	193.33	12	11	2.5	0	249.5	15.5	6	729.17
6:45 AM		2.5	136.98	174	0.5	44	0	1	247.5	62	3.67	277	1	57	274	28	0	0	80.5	616.22	243.5	44	291	392.67	293	62	84.5		60	428.5	510.5	590.5	198.5	5	1033.5	4.5	1	17	408.5	74	10.5	2.5	226.5	2	5	90.5	243.5	7	312.5
7:00 AM		179.5	77.5	52.5	6.5	9.5	0	3.5	55	25	2.67	137.5	10.5	1	90	7	26	0	0	355.27	143	2	60	31	121.5	233	55.5		290	629.33	628	868.67	230	111	1420.83	199	2	1	292.5	168.5	2	0	171.5	3	1	109.5	3.5	5.5	89
7:15 AM		101	10.33	0	0.5	194.5	28	49.5	0.5	52	0	210.5	1	22	1	0	1	0	34	84.5	173.5	0.5	13.5	4	24	3	0		234.67	252.67	409.5	183.5	12.5	294.5	851.67	370	30.5	15	13	13	0.5	38.5	74.5	2.5	9.5	1	5.5	178.5	8
7:30 AM		4.5	0	7.5	64	154	2.5	2.5	0	2	3.67	232.5	166	31.5	0	6	3.5	17	72	0	13	41	32.5	5	0	0	12		156.5	83.67	81	398.67	2	385	1104.67	353.5	351.17	10	0	0	0	82.5	11	28.5	4.5	0	8.5	51.5	0
7:45 AM		0	107.33	23.5	131	34	1	0	0	8	0	19	86.5	5.5	0	33	322.5	0	1	0	1.5	3.5	173.5	28.67	0	0	122		0	88.17	3	39.5	3.5	461.5	648.17	219	8	157	2	0	46.5	2	0	23	3	27.5	17.5	2.5	3
8:00 AM		3.5	1.5	1	31.5	1.5	11	52	40.5	14.5	0	5.5	0	3	26.5	164	270	0	0	0	0	0	2.5	0	0	14.5	33		4.5	68	26.5	188.5	3	506	61.5	19.5	5	1	82	0	338.5	4.5	76	60.5	2.5	6	20.5	0	0.5
8:15 AM		51	101.4	21.5	0.5	17	86	3.5	34.5	229.33	157.17	110.5	3	12	7.5	98	17.5	21.5	0	28	1	15	3.5	28.5	11	4.5	19.5		38	60	266	36.5	5	235.67	0	0	0	4	18	3	98	2	17	0	7.5	2	9	0	18.5
8:30 AM		8	1.33	5	0	72	20	1	5	98.5	75.75	5.5	122.5	100.5	0	34	0	27.5	4	116.07	23	0	4	0	340	0	0		2.5	22	56	6	220	184	2.5	29.5	0	11	21	2	32	17.5	7.5	0	0	84.5	1	7.5	83.5
8:45 AM		2	0	14	4	45	60	3.5	1	75.5	0	4.5	16.5	83.5	0	0	2	350	0	3	0	6.5	2	0	57	0	0		17	9	2.5	0	70.5	5	2	3	197	10.5	0	1	90.5	110.5	0	45.5	74	321	117.17	126.75	114
9:00 AM		5.5	8.42	165.5	0	1	0	0	4.5	8.5	5.2	2.5	0	37	52.67	2	0	4	6	0	0	3	121	33.5	0	15	186.5		0.5	47.5	0	24	4.5	5.5	23.5	29.5	409	30.5	0	4	0.5	339.33	2.5	5	27	124.5	83	14	1
9:15 AM		87	45.83	37.5	83	6.5	15	163	62	205.5	7.33	21	2.5	1	181	162	5	2	94.5	4	0	63	178.5	2	0	26	33.5		0	87	0	510.67	2	34.5	921.5	91	207.5	2	30.5	48.5	16.5	111.5	5	30	0	0	163	2	3
9:30 AM		4	126.33	9.5	1	1.5	64	21.5	0	202	2.67	12.5	3.5	37	33	67	184	0	267.67	0	2	47.5	3	1	1	0	4		3	6	6	467.67	7	480	1064.33	2	2	5	394.5	156	0	13.5	139.5	109	0	17.5	6	2	3.5
9:45 AM		1	50	7	0.5	5.5	0	0	1.5	0	10.03	5	3	64	0	11	13.5	0	67	0	166.5	116.5	3	0	3	0	4		116.5	0	5.5	331.17	4.5	196.5	898.67	5.5	2.5	3	101	0	21.5	0	152.5	57	2.5	33.5	2.5	10.5	0
10:00 AM		10	0	6.5	1.5	17.5	0	2.5	4	0	235.42	0	11	3	2	30	1.5	40.5	1.5	1	23.5	23.5	2	26.5	24	0	21		153.5	11.5	251.5	110.5	112	405.67	350.5	80	72	51	9	8	109	0	137.5	2	0.5	3	0	171	0.5
10:15 AM		109.67	4	17	29	68	36	1.5	1	318.17	186.77	138.5	59.5	4	2	7	5.5	1.5	2	81.77	0	16	53	0	252.5	44.5	189.5		7	186.5	106	0	66	369	4.5	28	195	8	1	5	2	34	0	6	131.5	2	0	9	41.5
10:30 AM		28.5	4.5	3	87	1	29	117.5	0	6.5	4.67	262	0	7.5	49.5	44.5	2	1	26	200.83	1	0	0	0	322.5	267.5	223		2	161	3.5	0	0	517.5	0	94.5	80	1	24.5	76.5	0	2	16.5	12	60.5	49	0	0	75.5
10:45 AM		0	25.83	9.5	0	0	10	144	2	28.5	14.58	63	0	22.5	11	16.5	164	199	2	23	2	0	4.5	169.67	68.5	24	2.5		6.5	37	0	0	0	16	82.67	22.5	3	5	115.5	100.5	0	2.5	0.5	5	2	0	4	2	7
11:00 AM		0	0	8.5	0	0	3	31	197	3	18.58	86.5	4	4	0	2	8	21.5	38	0	30	42.5	8	221.17	14	4	0		0	11	1	0	1.5	6	203.5	6	0	53	294.5	314	0	13	8.5	26	0	137	9.5	4	3
11:15 AM		88.5	0	118.5	2	7.5	71.5	0.5	88.5	2	116.72	5	54	2	6	23	6.5	3	15	8	0	1	0	1	0	98	5.5		29.5	77.67	2.5	32.5	4.5	3.5	32	0.5	5	141	15.5	1.5	7	0	3.5	218.67	0	236.5	98	5	1
11:30 AM		7	6.17	35.5	3	66	49.5	1	64	98	23.33	26.5	16.5	58	0.5	260	2	2	1	0	0	0	70.5	2	0	5	3.5		30.5	2.5	1	428.17	25.5	22.5	0	6.5	0	32	0	9.5	0	0.5	29	65.5	0	181.5	4	147.5	0
11:45 AM		4.5	172.67	2.5	2	0	59.5	0	4	0	0	15	18.5	29	4.5	279	215	0.5	26	5	2	3.5	7.5	21.5	2	5	38		151.5	83	173	87.5	2.5	0	1.5	9	0	2	263	0	11.5	76	0	0	1	82.25	0	111	4.5
12:00 PM		16.5	314.73	1.5	334.5	2	0	3.5	8	33.5	87.88	8.5	8.5	0	107.5	76	12.5	0.5	0.5	0	0	18.5	4	4	168	10	292.5		2	97.5	175	0	74	33	1	142	222.5	61	198	1.5	113.5	326.67	0	4	0	0	0	52.5	1.5
12:15 PM		0	122.5	1	258	1.5	0	61	2	2.5	8.17	4	63.5	24	115	20	6	8.5	20.5	0	25	45.5	0	1	119.5	16	29.5		1.5	28.5	49.5	0	13	9	35	56	440	13	3.5	97.5	224	388	8	5	13	1	0	3.5	0
12:30 PM		0	17.33	22	88	1	0	0	0	2.5	4.08	43.25	49.5	51	16	3	9.5	6.5	0	50.81	239	6	19	4	0	5	0		4	0	33.5	0	2	4	0	0	487.5	2	5.5	2.5	0	122	138	9	2	6	1	0	68
12:45 PM		44	0.5	9	15.5	1	101	2.5	17.5	4.5	3.67	3	0.5	2	3	16	2.5	26.5	10	58.46	123	1	4.5	28	0	5	0		1	45.5	3	0	3.5	7.5	0	2	3.5	274	5.5	2	0	9	4.5	67.5	0	0	174.67	7.5	468.5
1:00 PM		12	6.67	14.5	0	110.5	35.5	55	37.5	28	9.83	106	2	12.5	0	3	49.5	311.5	57	1.5	23	5	36	0	5	241	0		3.5	201	5	78.5	29.5	48.5	0	12	0	137	0	5	0	0	74.5	1	0	50	64.5	0	52
1:15 PM		12.5	0	93.5	34	183	0	0	0	0	41.85	167	0	108	1	22.5	182.5	173.5	0	1.5	0	0	0	62	203	1	2.5		4	8	1	203.5	14.5	1.5	5.5	142.5	0.5	91.5	0	0	181	0	0	0	0	7	5	90	4.5
1:30 PM		107.5	3	126	54	19	0	3.5	1.5	10	16.83	7.5	9.5	137.5	0	52.5	239	51	2	0	1	5	1.5	6.5	22.5	2	8.5		35.5	1	4	0	3.5	49	10	85	0	4.5	11.5	199.5	32	0	0	0	19.5	0	3.5	176.5	3
1:45 PM		46	95.17	84	0	4	0	0.5	4	159	0	7.5	119.5	5	3	129	10	0	2	29	2	0	8.5	0	1.5	2	2		45.5	10.5	2	0	11.5	162	59.5	7.5	43	0	5	229.5	0	0	2	3	218	3	103.5	6	0
2:00 PM		7	14	61.5	0	0	11.5	143.5	1.5	3	2.67	3.5	70.5	0	85	9	1	1	5.5	25.5	7	31.5	39	2	0	3	4.5		29	18	6.5	0	34.5	210.5	35.5	2.5	1	2	36	157	0	5	0	59	292.5	9	232	33.5	0
2:15 PM		0	0	0	3.5	0	49.5	145.5	36	47.33	1.33	7	21.5	25	81	8	0.5	0	102	221.05	2	258	156.08	16.5	5.5	8	58		14	276.5	1.5	1	1.5	479	5	7.5	1	21.5	396	9	1	131.5	0	50	115	180.13	9.5	36.5	5
2:30 PM		0	0	24.5	0	1.5	49	69	12	136.5	5	48.5	10	102	8	5	5.5	3	26.5	0	0	112.5	35.5	8	38.5	1	46		1	37	8.5	0	111.5	337	5	47.5	1	21.5	360	15	14	281	2	3	0	447	1	5	23.5
2:45 PM		11	29	32	0	2	20	3.5	0	2	250.98	93	10	15	6	5	21.5	4	6	0	30.33	129.5	4	0	172	1	20		125	2	302	0	1.5	53.5	10	0.5	169	13	424.5	2	67	3.5	46.5	10	0	16	1	26	191.17
3:00 PM		7.5	109	228	63.5	42	24	0.5	2	50	2.33	39	14	4.5	4	24	16.5	1.5	0	1	2	204	0	0	3	0	0		214.5	69.5	150.67	0	0	1	539.5	0	775.5	1	80.5	0	0	3	1.5	13.5	0	0	50	2	172.5
3:15 PM		9.5	2.33	157	18	27	0	1	4.5	2.5	0	25.5	54	40.5	1	5	2	212.5	13	0	4	0	2.5	26.5	0	3	0		140.5	4	18.5	171.5	2	2.5	1008	21	534.5	0	170.5	19	1	17.5	3	106.17	1	19	63.5	5	1
3:30 PM		0	0	13	0	1	0	1	2.5	0	0	6.5	44.5	2	2	1	11	31	44	2	0	0	7	259.5	3.5	23	2		42	4	0.5	472.5	30.5	2	1082.17	0	507	14	315	17.5	0	59	12	222.67	2	43	2	2	2
3:45 PM		57	0	15	2	0	17.5	37	3	3	2.67	2	15	17.5	170	5	162	6	7	38	2.5	4.5	1	170.17	48.5	108	1		4	162.5	0	726	6	4.5	1040.67	123.33	390	122	0	6.5	36	19	112.67	314.5	17	0	0.5	80.5	0
4:00 PM		120	3.67	6	2.5	2	12	12.5	4	2	10	5	9	0.5	20	93	8	0	5	220.27	75.5	31.5	19	12	165	145	29		4	161.5	0	93.5	3.5	21	392.67	215.5	27	67	0	133.5	40	1.5	259.5	77.17	61	57	14.5	116.75	21
4:15 PM		28	0	6.5	156	24	26	0	32	9.5	62	5	130	67.5	0	136	4	1.5	4.5	309.97	0	0	27	0	36	46	2.5		0	12.5	2.5	2.5	9	3	44.5	217	0	32	0	206	1	0	233.5	9.5	4	5	5	122.5	98.5
4:30 PM		0.5	20.87	10	175.5	16	0	4	23	39.5	48	70.5	53.5	3.5	0	12	1.5	4.5	2.5	60.3	28.5	8.5	207	0	0	2	19.5		0	35.67	2.5	0	107	0	5	20.5	0	1	0	2	22.5	1	15.5	3	0	28.5	2.5	30	748.67
4:45 PM		0	42.1	36.5	57.5	2	0	5	1	162	6.17	0	12	43	2.5	74	45.67	91.5	7	32.37	2.5	4.5	21	2.5	0	2	0		1.5	9	42.5	0	11	18	4	4.5	71	2	59.5	0	105.5	35	75	3	164.5	0	31.5	6.5	430
5:00 PM		20.5	111.33	49	2	1	27.5	32	4.5	54	10.33	9	19.5	5	12.5	266	324	65.5	210	0	9	0	4.5	8.5	7	1	1.5		39.5	5.5	118.5	22	12	0	2	20	66	8	25.5	0	282	57	0	35	12.5	0	20	45.5	395.33
5:15 PM		30.5	0	1	1	14	31	33.5	26.5	10	99.05	6	4.5	5.5	144.33	21	536.5	1	82.5	10	6.5	0	2	6	241	14	0.5		4	7.5	23	272.5	1.5	285	1.5	11	536.5	10	42.5	3.5	205.5	11.5	22	110.67	0	101.5	157.5	35.5	25
5:30 PM		47	0	5	2	104.5	20.5	300	222	4	13.17	0	17.5	13.5	2	4	382	2.5	21	0	259.5	45.5	4.5	3.5	67.5	23	38.5		0	5	229.67	7	12	464	2	3	0	88	94	10.5	40.5	99	13.5	0	8	461	2.5	1	2
5:45 PM		0	11.83	96	47	2.5	32.5	2.5	79	2	6.33	67	31.5	12	1.5	96	207.5	47.5	0	84.53	18	20	5	19	0	15	29		10	64.5	34	0	3	361.5	201.17	26	0	21.5	155.5	72	0	0	0	3.5	2	102.5	22.5	3.5	0
6:00 PM		3	0	263.5	30	5.5	31	1.5	1.5	13	23.83	3.5	56	14	11.5	16	65.5	217	0	305.12	0	41.5	145.83	88	4	0	489		143	208.17	7	19	26.5	183.5	1081	28	386.5	2.5	379	105	0	2.5	1.5	32.5	0	2.5	0	9.5	45.5
6:15 PM		23	0	119.5	27.5	15	66.5	32.5	0	7	2.33	8.5	18.5	27	78	50	41.5	55.5	9.5	31	80	0	47.5	3	0	17	210		168.5	4.5	4	3	4	0	1038.67	321	75	43	437.5	30.67	60.5	110	41	132.5	2	7	93.5	151.5	33.5
6:30 PM		31.5	5	73	3.5	47.5	8	14	0	52.5	38.5	141.5	2.5	63	35	212	33.5	52.5	119	80.17	1	1	11.5	48.67	235.5	30	159		12.5	21	3	84.83	67	24	167.5	8	375.5	142.5	494	13.5	102	441	12	334.33	68	78	59.5	45	5.5
6:45 PM		23.5	94.87	117.5	30	13	101.5	18.5	3	37.5	126.1	31.5	19.5	33.17	57.5	276	100	396	9.5	0	9	2	63.5	111	40	190	17		45	4.5	124	608.5	104	74.5	23	105.5	216.5	288	415	219.5	27.5	421	75	146.83	152.5	711.33	0	0	23
7:00 PM		200.67	83.83	113.5	425	267	166	72.5	155	254.17	758.63	19.5	116	387.5	146.17	314	379.5	367	17.5	74.63	283.5	88.5	688.5	303.33	0	599	33		10	99.5	375.17	657.33	221	7.5	115.5	532	479	208.5	529	235	285.5	451	76	328.67	175	539	36	155	274
7:15 PM		297.17	80.37	248	265.5	364	121.5	444	411	541.5	902.52	180	44	381	350	289	433	254	267	509.47	361.5	75	538	292.75	204.5	342.5	183		343	83	228.67	621.67	301	198.5	1039.83	392.5	456	141	595	275	388.5	446	255.5	336	147.5	408	292.67	385	943.33
7:30 PM		205	237.6	307.5	376.67	362	16.5	369	335	312.5	310.97	149.5	128.83	345.67	421.5	290	772	314	686.67	374.1	309.5	150	469.5	324.5	333.5	279	516		249	64	325	569.67	243	348.5	551.83	395.5	710	152	464	283.5	192.5	352.5	239.5	218.17	303	559.67	260	300.92	823
7:45 PM		142	81.83	296	266.5	200	33	584	449	417	607.03	298	20.5	390	237	297	583	386	616.5	244.55	205.5	43.5	504	378.17	219.5	253	297		158	719.5	295.5	841.83	156.5	460	1011	268	675	159.5	361	223.5	385.5	361	277.5	397.5	116.5	867.5	352	333.5	261
8:00 PM		374	44	158	171	368.5	69	360	504.5	504.5	689.83	133.5	146	234.5	210	237	654	237.5	558.5	185.72	419.5	96	573.05	188.5	19	283.5	284		79	1108	320.17	252.5	469.5	470.5	490.5	425	673	240.5	422	209	352	524.17	253.5	537.5	155.5	772	176.5	282	429.5
8:15 PM		146	0	192	234	280.5	23	335	134.5	321.5	687.02	193.5	91.5	283.5	461	245	351	506	718	97.43	247.5	87.5	267.5	296	271.5	33.5	321		55	715	176.5	678	594	363.5	1154.17	716.5	534	193.5	536	66	388	424.67	71	72	155	530.17	309.5	307	29.5
8:30 PM		204.83	28.17	26	213	139	217	445	319.5	327	708.73	23.5	90	206	311	186.5	835	473.5	585	135.98	145	6.5	360.33	186	318	15.5	141		12.5	287	289.67	767.83	567.5	248.5	911.5	355	684.5	118.5	403	221	328	390.5	155	0	70.5	670	88.67	388	39.5
8:45 PM		192.5	0	3.5	231.5	403	54	454	391.5	515	586.82	6	159.17	55	33	264.5	628	291	275	2	230.5	240.5	370	163.17	98.67	200.5	227		108	965.67	183.5	661	492.5	0.5	1366.67	384	502.5	198.5	447.5	374	216	461.83	44	106.5	136.5	772	421.5	443	5.5
9:00 PM		56	380	40	417.67	456	123.5	433	401	448	868.85	268	14	6	155	117.5	753	537	822	189.33	85.5	200	551.5	0	23	436.5	35		279.5	1180.67	77	490.5	516	5	959.33	636	807.67	85.5	547.5	211	415	350.67	76	398.9	0	593	405	554	14.5
9:15 PM		56	384.77	6	274.5	366	44	475	212	545	513.12	254	19.5	90	308.5	231.5	595	477	515	213.3	223	199	108	4	2	7.5	30		236	754	301.5	597	411	153.5	1149.75	341	577	119.5	538	401	238	356.5	173	285.17	24.5	760.5	113.5	578.5	7.5
9:30 PM		129.67	277.67	123	87.5	142	26	464	306	395.5	300.72	154	186.5	97	336	113	555	428.5	617.5	17	99	168	120	10	143.5	124.5	19.5		38	708.5	409	616	569	548.5	1030.83	521	531.5	5.5	422	241	325	329	388.5	5.5	226	844.5	364.17	390	18
9:45 PM		449	106.93	201	330	315	2	283	386	436.5	32.25	175.5	170.5	484	168	299	658	197.5	404.5	0	173	127	111.5	256	133	23	37.5		52.5	184.5	299	604	435	441.5	1035.17	413	822.5	64	492	348	294	367.67	360.5	217	175	683.5	231	632.5	295
10:00 PM		80.5	581.73	100	87	88	51	107.5	215	371	470.07	179.5	60	221.5	168.5	139	566	358.5	677.5	6	95	202	26	354.67	409	11	420.5		18	44.5	207	482	419	328.5	728	385	735	116.5	524	279.5	340.67	279.67	300.5	356.45	191	759.5	304	356	394.5
10:15 PM		27.5	12.83	136.5	6.5	123.33	80.5	205.5	297	59	814.82	192	193.5	58.5	87.67	243	654.5	414.5	419.5	34.07	0	275	15	325.67	211.5	188	745.72		39.5	62	114.5	683	208	354.5	636.67	391	502.5	12.5	357	125.5	317	359	280.5	66	121	431	71.5	561	289.9
10:30 PM		1	111.5	189.5	118.5	269	4.5	19	153	256.5	57.37	48	0	18.5	13	345	544.5	317.5	809	268.93	8.5	209	147	85.5	256	315.5	484.13		166.5	11	165.5	503	355.5	102	1323.67	36	595	218.5	553	183.67	178.5	164.5	362	186	191	737.5	19.5	528	209.17
10:45 PM		17.83	81.1	116.5	365.17	98.5	24	39	156	154.5	428.07	24	48	64.5	84	137.5	248.5	382	322	259	2.5	50	36	253	71	74	428.75		46.5	120.5	425.5	513.5	196.5	83	705.83	3	540.5	329.5	411	420	401.5	1.5	345	21	126	668	336	278.25	121.4
11:00 PM		1.5	18.5	148	33.5	364.5	51.5	255	296.5	16	700.57	38	2	4	8	82.5	696.5	134.5	632	503.72	2	2	14.5	115.17	374.5	318	475.78		54.5	9.5	93.5	346.5	7	64.5	1191.67	77.5	607	181	317	154	298	35	352	64.5	134.5	863.5	439.67	568	20.5
11:15 PM		225	290.93	104	0	340.5	19	425.5	168.5	306	259.6	41	143	46	38	26	501	399.5	486	117.65	10	45.5	85.5	97.5	720	705	633.93		235	610.83	338.5	697	137.5	580	735.17	92.5	481.33	207.5	375.5	225.5	248.5	48	238	10	228	809.5	413.67	82.25	0
11:30 PM		107	4.33	9.5	78.5	481	29.5	329	211	476.17	0	44	49.5	26	99	42	315	475.5	137.5	26	264.67	20.5	34	30.5	220.5	480.5	416.37		158.5	1235.17	282.67	401	530.5	465.6	1315.83	38	764	170.5	551	173.5	352	248	381.5	42.5	155.5	736	180.17	654	67
11:45 PM		95.5	2.33	105.5	343.5	68	30	372.5	113	321.5	0	199	6	52	2	31	600	476	444	8	207.5	16.5	615.5	0	342	157	446.8		154.5	1018	13.5	512	470.5	309	903.83	57	367	201	177.5	243	360.5	253.5	254.5	28	119	574.5	365.5	322	0
12:00 AM		4.5	27.5	4	317.5	2.5	21	363	2	282	170.35	225.17	4.5	5	4	154	493	581.5	667	9	178	3	640.25	168.33	535	74.5	358.72		5.5	1095.5	0	496	392	297.25	788.67	243.5	583.5	134	0	19.5	163	24	49.5	408.83	1	663.5	377.5	123.5	0
12:15 AM		3.5	58.17	5	89	69	145	93	0	239.67	17.17	98.5	10	119	69	342	32	271.5	628.5	52.17	136	78.5	662.5	163	104.5	584.5	153		24.5	745.17	28	551	448	375	1279.17	510.5	432.5	109.5	307	81	312	73	393.5	400.83	0	405.5	293	76.5	6.5
12:30 AM		79.5	116.33	142	55	204	66.5	13	89	4	0	268.5	4.5	427.5	201	337	76.5	170	338	360.37	161	90	443.5	4	565	123	151.18		135.5	965	326	508	264	290	1136.33	191	210	154.5	80	14	340	1.5	593	350.33	18	878.17	52	12.5	9.5
12:45 AM		1.5	25	33.5	35.5	132.5	81.5	0	0.5	113	0.83	99.5	153	356.5	214	526	3.5	277.5	467	456.42	314	218	503.5	131	227	409	19.67		314.67	1334.67	282.83	483.5	164.5	307.5	833.5	47	550.67	0	134	0	358	0	181.5	438	2	705.5	408.5	2	365.5
1:00 AM		20.5	13.33	6	2.5	244	21	14	0.5	48	29.75	239	120.5	248.5	232	265.5	101	364	655	161.18	38.5	225	273	393.67	129.5	317	0		110.5	446.67	371.5	581.5	146	493.17	805	0	131.5	37	123.5	0	277	0	262.5	165.5	165	484.5	121	42	903.9
1:15 AM		15.5	31.83	20	0	66.5	12	108	100	1	837.58	88.5	59.5	148	164.33	369.5	342	260	241	239.93	2	132	187.5	303.5	2	131	305.87		111.5	44.5	345.5	396.33	0	543.48	1083.33	40.5	80.5	36	383	16	149	30.5	200.5	298.92	132.5	297.5	37.5	18	789.5
1:30 AM		1	22.33	281	7	30	9	128.5	242	70	715.83	0	87.5	57.5	350.67	214	457	52	6	38.5	1	244.5	38	271.67	0	1	166.88		4	52	503.5	529.17	3	126	686.17	132	18	6	406	367	293.5	373.5	85	5	263	39.5	6.5	248.25	321
1:45 AM		0	170.87	63.5	75.5	38.5	62	402	314.5	511	258.08	0	13.5	3	106	288.5	288	1	32	49.03	3	188	16.5	186.5	2	0	8.5		26	2	186	497.5	94.5	102	559.5	6	21	82	458.5	360.5	131.5	359.33	2	11	245.5	38.5	1	694.17	836.92
2:00 AM		4	638.07	139.5	28.5	4.5	27.5	259.5	318.5	479	56.12	0	96.5	0	297.5	307.5	0	0	2	111.87	83.5	59.5	15.5	7	0	0	26.67		88.5	135	231.5	540.5	125.5	9	3.5	2.5	17	38.5	185	260.5	182	167	0	77.5	203	45	10.5	521.5	571
2:15 AM		38	447.3	8	5.5	28	15	191	406	330	3.67	0	14	51	241.5	6.5	49	1.5	3	31	276	166	1	1.5	87	0	11.67		2	36	244	597.67	536	41	1024	22	69	113.5	13	437.5	18	293	37	160.67	100	498	2	409	810.17
2:30 AM		3	237.67	38.5	3.5	284.5	44	281.5	232	59	8.5	7.5	14	13	140.17	2	3.5	18.5	72.5	9	238.5	226	292	67.17	146.5	2	83.97		21.5	56	235.5	352.83	196	167.5	999.33	7.5	285	353	18.5	138.5	1	322	15	80	1	469	4.5	326	280.5
2:45 AM		0	64.33	0.5	0.5	74	163	198.5	6	47	0	7.5	124.5	0	163	49.5	321	23	389.5	0	86.5	100	18	23	459	23	3.67		6	1130.5	209	12	163.5	333.5	852.83	66.5	632	205.5	2.5	421	4	18	201	4	2	342.5	3	179	383
3:00 AM		31	2.33	2.5	71.5	10	108.67	66.5	0	161	6	1	168.5	23	47.5	255.5	145.5	468.5	654	65.03	247	62	13.5	12	287	27	89.88		263.5	837.5	206.5	10	349	365	859.33	485	549	156.5	2.5	22.5	4	0	381.5	62	2.5	348	82.5	0	551.5
3:15 AM		32.5	30.67	5.5	198	68	64.5	4	0	34	207.93	100.5	64	35	7.5	37	4.5	327	438	7	70.5	1.5	41	46	94	208	718.6		169	971.83	267.5	4	151	338.1	846.5	405.5	380	156	48	8	24	3	231.5	32	0	23.5	60	6.5	342.5
3:30 AM		358.67	170.7	9	261	111.5	53.5	0.5	278	2	572.01	164	153	1	5.5	63.5	68	183	494	0	1	43	85.5	382.83	136.5	586	469.17		349.67	677	137.5	0	298	229	842.5	83.5	830	6	244.5	128.33	97	25	108.5	264.67	103.5	57.5	407.17	14	71
3:45 AM		182	0	221	26.5	1	3.5	9	182.5	2.5	146.32	149.5	16	59.5	1	4.5	2.5	201.5	281	0	0	17.5	6.5	367.33	1.5	390	107.18		198	818.5	87.5	3	21	234	1045.5	34.5	166	1	559	54	353	0	311.5	308.67	171.5	1	311.83	33.5	28
4:00 AM		150.5	3.83	146	0	0	47	28	27	20.5	13.33	239.5	41	292.67	8	4.5	3.5	50.5	64	66.73	20.5	54.5	77	207	0	604	85.73		290.5	1532.5	3	4.5	0	359	433.83	3	70.67	150	227.5	0	232	30	118.5	355	246	14.5	324.5	27	5
4:15 AM		0	0	34.5	2	8	75.5	91.5	0	43	2.67	96	8.5	139	77.5	29	6.5	0	120	188.47	32	2	18	271	63	275.5	3		174	461.5	9	280.5	7	442.5	24.5	32	0	10.5	181.5	3	109.5	0.5	7	55.5	241.5	32	369	1	4
4:30 AM		11	76.67	7	2	0	84.5	346.5	0	54	2.33	91	12.5	109.5	376	252	31.5	1.5	29	20.5	63.5	0	37.5	1.5	2.5	168.5	12.5		142	405	4	750	3.5	537.17	0	129	38	3	477	15.5	0.5	0	25.5	7	98	329.67	332	112	113.5
4:45 AM		0	456.87	27.5	154.5	3	189.5	161	1	597	60.45	1	23	35	420	340	1	9.5	0	15.5	318.5	36	49	23	4.5	1	16.5		13.5	134.67	3	607.67	147	258.5	277	0.5	12	100	317	45	150	27	0	44	10	606.5	87	465.92	260
5:00 AM		0	56.5	70.5	157	83.5	49.5	383	0	561	171.97	4	145.5	2	107.5	192.5	6	358	0	3.5	292.5	102	678	8.5	261	0	13		43.5	265.67	345.67	513	349	17	898.17	0	0	170.5	130.5	203.5	0	2.5	0	41	2	598.5	217	500.5	62.5
5:15 AM		10	0	207	21.5	97.5	30.5	200	153.5	305.5	442.28	55	0	43.5	10	27	482.5	198	157	2	232.5	150	625.17	21.5	223.5	0	113.75		0	1275	474.67	660.67	134.5	122	862.83	2	138.5	134.5	0	412	0	304	88	23	141.5	338	231.17	135	5.5
5:30 AM		23.5	200.8	8	0.5	3	22.5	438	301	204	6.33	7	44.5	60.5	0	3	605.5	210.5	253	39.5	194.5	201.5	443.5	366.33	457.5	53.5	139.45		3.5	877.17	474.67	496	24.5	47	1296.83	22.5	410.5	0.5	1.5	141.5	18	477	323	66	113.5	68	11.5	55.5	0
5:45 AM		79	136.17	3	0	0	11.5	250	265.5	384	0	46.5	62.5	93.5	69	5	195.5	2.5	372	447.13	175	224.5	632	272.5	222.5	448.5	632.33		51.5	1096	500.83	665.5	2	158	1247.5	549	22.5	0	6	180.5	0	275.67	373.5	334	0	2	7	16	0
6:00 AM		114.5	0	6.5	0	116	268.5	261	368.5	430.5	62.6	246	35	312.5	66	4	413.5	0	385	474.8	165.5	90.5	181.5	169.5	1.5	485	439.67		236.5	516.5	499	535.5	29	292	993.5	482	0.5	5	61	1	151	256	323	258.17	5	8	0.5	50	27.5
6:15 AM		0	2.17	306	78	441	160	54	281.5	32.5	512	114.5	269.5	91.5	0	58.5	17	1	84	160.37	150.5	120	187.5	32.5	0.5	144	37.33		275.5	70.5	459	512.17	270	410.5	787.17	143.5	1	0.5	533	0	344.5	285.5	110.5	91	0	310	7.5	415.5	806
6:30 AM		0	10	117.5	302	320.5	50	2.5	115.5	14	165.33	292	113	2.5	168.5	227	189.5	2	16	8.5	207.5	46.5	138.67	196.17	0	64	0		136.67	21.5	631.17	406.5	485.5	457.5	731	13	39.5	16.5	294	0	185.5	45	8	7	0	419	225	190	613.17
6:45 AM		0	90.73	16	370.67	48	0	13.5	41	263.5	0	118	44	5	303.17	305	6	3.5	3	46.92	228	206	525.5	6.5	0	2	0		67.5	140	258	118	31	470.5	813.5	1.5	556.17	28.5	258	36.5	81	70	2	6.5	0	305.5	301	0	148.5
7:00 AM		0	0	2	256.5	81	1	0.5	0	108.5	29.7	34	1	3	328.5	310	2	71.5	4	0	71.5	7	46.5	147	0	38	97.78		192.5	1184.67	230	39.5	9	587	980.83	90.5	445	0	22	222.5	0	0	39	21.5	4	53	258.33	2.5	283
[truncated: 2 more columns]

## Sheet: Fig 5 C FR1
	Control																		Ntn1 cKO Vgat Cre																		sgNtn1
Day 1	49	63	53	93	90	86	93	103	88	3	48	14	57	4	98	84	69	50	92	62	69	79	80	111	90	53	2	46	65	29	57	1	52
Day 2	59	61	108	106	100	106	125	149	102	92	66	51	70	67	137	115	81	66	170	62	59	62	91	122	126	99	31	41	74	69	79	48	72
Day 3	64	72	107	105	76	109	103	109	86	87	66	61	86	57	138	93	88	46	111	86	84	114	100	153	110	125	68	67	66	97	108	53	74

## Sheet: Fig 5 C FR5
	Control																		Ntn1 cKO Vgat Cre																		sgNtn1
Day 1	51	46.2	77.2	56	73	101.8	36	110	98	75	65	46	74	46.4	82	68	88	87	93.6	125	115	107	107	138	110	102.2	69	64	77.4	51	82	50	85
Day 2	71	55	89	76	66	78	58	108	121	106.6	85	39	64	57	81.2	76	67	85	110	139	98	101.2	129	117	126	75	44	54	63	64	71	47	83
Day 3	90	84	79	66	93	74.4	78	108	95	84	62	56.2	64	53	84	77	65	69	106	107	104.4	110	122	121	110	103	54	71	63	63.8	81	64	79

## Sheet: Fig 5 D
Control																		Ntn1 cKO Vgat Cre
356	286	430	366	0	386	99	441	430	296	306	51	9	356	376	463	356	286	326	452	463	463	376	419	463	430	286	397	376	441	346	326	441

## Sheet: Fig 5 E
	Control																		Ntn1 cKO Vgat Cre
Day 1	267	144	238	241	193	287	152	286	180	186	144	109	118	162	146	143	219	169	300	281	382	240	252	487	258	283	108	233	192	213	216	236	238
Day 2	103	64	124	123	120	175	69	121	113	83	60	90	71	80	111	99	77	97	89	116	206	127	120	222	125	160	114	108	118	91	137	123	92
Day 3	49	52	79	71	79	85	35	54	60	65	70	73	119	58	111	55	90	131	40	75	52	69	127	91	134	129	79	101	73	39	93	81	66
Day 4	53	55	63	50	44	75	27	34	27	41	60	110	174	39	117	72	100	120	80	111	61	80	114	37	196	94	53	49	48	37	88	115	49
Day 5	35	38	43	65	46	79	30	53	62	73	44	94	128	58	99	78	108	93	97	88	66	137	153	110	173	76	44	38	76	46	89	112	56

## Sheet: Fig 5 F
Startle pulse (dB)	Control																		Ntn1 cKO Vgat Cre
0	111.3	40.6	100	35.2	51.8	38.6	42.9	24.9	20	21.1	26.4	52.8	30.4	17.1	51.3	31.7	36.3	21.1	37.5	17	37.5	11.3	50.3	25.4	45.4	36.1	23.9	26.4	29.9	21.5	46.9	10.8	39.2
80	191.1	174.6	97.1	103.6	753.3	231	107.9	72.4	57.6	46.4	103	236.8	39.7	311.9	56.5	30.9	30.3	25.9	140.5	34.3	36.7	46	103	72.8	64	68.9	81.6	38.6	90.5	14.6	57.2	22.9	41
90	193.4	186	142.9	161	473.1	225	399.9	46	84.8	68.4	150.3	151.8	201.6	362.8	129.3	37.5	25.9	133.3	332.7	87.4	69.3	63.9	117.3	165	74.6	37.2	60	72.2	41.1	54.3	39.2	34.6	47.9
100	248	166.6	277.8	399.9	635.3	249.1	259.8	69.9	150.3	66.8	286.7	93.8	343.7	231	370.6	160.1	94.3	70.2	390.7	175.7	124	114.8	113.8	392.5	91.2	74.2	39.6	45.5	57	135.3	51.7	96.3	97.2
105	216.8	110.4	340.2	423.8	1124	417.9	278.8	68.4	612.6	68.8	510.3	221.7	527.3	631	824.9	261.7	299.9	57.6	222.1	139.2	194.8	164	274.5	305.8	117	331	58.7	125.6	66	137.5	107.4	222	61.4
110	145	154.1	358.9	648	775.6	730.5	194.4	123.8	1071.8	100.6	461.8	344.4	717.7	413.9	1162	208.4	441.8	101.1	299.8	137	168.8	192.4	219.8	334	185.6	799.9	99.9	250.6	81	202.1	208.4	279.8	66.3
120	237.8	195.8	300.4	594.8	520.8	599.8	266.1	98.5	1209.4	112.8	382.2	413.6	459.6	529.8	1159.1	230.3	458.2	196.7	194.4	124.5	212.3	324.7	318.9	541	368.1	904.9	161.6	205.5	131.8	269	278.7	368.7	149.8

## Sheet: Fig 5 G
	Control																		Ntn1 cKO Vgat Cre																		Ntn1 cKO
5 db	0.886835	0.668926	0.133198	0.524472	0.715402	0.862053	88.6835	66.8926	13.3198	52.4472	71.5402	86.2053	35.4196	78.8198	27.6769	66.3754	39.7765	82.1832	31.6315	25.8975	18.3381	70.1646	67.4642	71.0489	72.8014	51.7718	69.3373	57.1968	43.7722	12.3618	55.5252	20.7439	32.2148
10 db	0.877684	0.564752	0.346856	0.737315	0.86679	0.917754	87.7684	56.4752	34.6856	73.7315	86.679	91.7754	74.0238	79.9346	41.8632	69.6585	46.1595	87.2379	49.8282	63.3324	28.3668	69.5614	79.4538	84.0416	84.0895	62.6288	65.4303	68.6706	32.2657	42.3116	80.2233	34.842	8.557
15 db	0.937068	0.637531	0.340095	0.792546	0.941206	0.93632	93.7068	63.7531	34.0095	79.2546	94.1206	93.632	55.1371	79.0622	74.3242	66.3048	63.3635	85.4813	48.6827	65.744	23.2665	74.8398	77.9194	83.4253	84.0652	73.1675	70.7715	66.9529	47.2123	37.6382	79.0385	52.0094	47.4832

## Sheet: Figure 5 H edge
Control																				Ntn1 cKO
441.775	471.538	420.087	453.387	409.943	519.72	388.789	7.47005	6.35885	5.23306	5.6835	464.464	506.306	311.111	438.105	496.563	390.19	295.162			480.747	431.031	469.87	480.948	489.556	435.836	474.341	489.623	412.946	268.669	391.325	400.868	493.093	370.304	519.72	506.373	432.833

## Sheet: Figure 5 H center
Control																		Ntn1 cKO Vgat Cre
47.6476	38.2382	55.0551	24.7581	74.6747	16.6166	39.1725	60.9276	36.303	66.4665	63.7304	23.0898	18.6186	158.091	41.2412	23.6904	66.5332	137.204	35.2352	48.7821	42.8428	22.1555	30.0968	49.7831	29.7631	23.8906	50.1835	91.7584	56.9236	55.9226	26.6266	72.4725	22.8228	15.9493	17.5509
