# Supplementary material for: Netrin-1 regulates the balance of synaptic glutamate signaling in the adult ventral tegmental area
Source: eLife. 2023 Mar 17;12:e83760. doi: 10.7554/eLife.83760 (PMC10023152; doi:10.7554/eLife.83760)
Supplement: Figure 6—figure supplement 1—source data 1. [file elife-83760-fig6-figsupp1-data1.xlsx]

## Sheet: Fig 6 Sup A Night
																												Ntn1 cKO DATIRES;;Vgat Cre
11878	5076	8900	13435	7298	10794	9363	9364	9365	9370	9371	9360	9361	9362	9366	9367	9638	9369	4936	14590	19546	16739	8345	11088	5534	8540			11382	12999	12876	12504	15635	38457	12045	19247	9048	2984	7080	5970	19687	7229	20682	12651	6663	18375	19067	19859	11809
6615	3530	4670	8338	5765	12735	11390	4627	4715	6786	6558	22670	16326	6236	21857	17212	20539	16534	8651	9586	13437	12913	5343	9701	4934	6359			5900	4148	5055	7134	4365	27568	7553	13826	10077	3166	2167	3286	12981	8990	17558	17081	6671	13827	14372	15660	20089
7267	3647	3459	7867	6023	11187	10731	8858	11226	8732	10615	11609	14037	7504	20704	25034	10418	14748	7010	10708	13010	11940	6888	7808	3574	5886			5588	3154	5020	5891	4287	24423	6741	11584	10166	2868	2539	2725	10114	9489	21797	15962	6191	15102	12158	15847	24453
Control																																								Ntn1 cKO DATIRES;;Vgat Cre
8586.67	4084.33	5676.33	9880	6362	11572	10494.7	7616.33	8435.33	8296	8848	14546.3	13241.3	7700.67	17309	17204.3	13531.7	13550.3	6865.67	11628	15331	13864	6858.67	9532.33	4680.67	6928.33															7623.33	6767	7650.33	8509.67	8095.67	30149.3	8779.67	14885.7	9763.67	3006
[truncated: 11 more columns]

## Sheet: Fig 6 Sup A Day
																												Ntn1 cKO DATIRES;;Vgat Cre
2550	1649	1820	1900	1975	1573	3193	2232	2818	3078	2044	1736	2853	1451	2273	4017	2229	3171	2470	3540	2960	5764	1573	1524	1218	1383			3272	3642	2581	3642	3947	15834	4428	6932	1837	799	1071	1098	2539	1544	4559	3003	1875	2364	2374	3614	4803
1688	1029	1515	1820	2190	1152	2218	1307	2124	2394	3045	2540	2412	1344	2226	3072	2725	2132	4144	3792	2412	3386	1847	1158	977	974			2470	2150	2401	3747	2281	14514	3747	5974	2418	657	1503	1467	2164	1553	6668	4200	1844	3112	1829	3156	7320
Control																																								Ntn1 cKO DATIRES;;Vgat Cre
8586.67	4084.33	5676.33	9880	6362	11572	10494.7	7616.33	8435.33	8296	8848	14546.3	13241.3	7700.67	17309	17204.3	13531.7	13550.3	6865.67	11628	15331	13864	6858.67	9532.33	4680.67	6928.33															7623.33	6767	7650.33	8509.67	8095.67	30149.3	8779.67	14885.7	9763.67	3006
[truncated: 11 more columns]

## Sheet: Fig 6 Sup B
Control																										Ntn1 cKO
4285.61	3416.19	4153.9	2769.56	3778.67	2914.09	3902.03	6176.68	6787.49	6048.39	9278.02	7302.76	9241.04	1307.76	4101.42	15936.5	4332.75	4483.02	4112.95	3243.92	3618.82	2866.83	3605.9	2789.33	2877.33	1914.39	2985.78	3118.58	4141.72	3740.35	4126.4	3378.87	4264.23	7340.07	2783.54	3549.31	4306.25	3255.36	3441.86	4955.89	4133.37	4162.65	3548.87	3860.61	3840.76	3961.77	1727.29

## Sheet: Fig 6 Sup C
Control																														Ntn1 cKO DATIRES;;Vgat Cre
22	22.4	23.8	23	24	28.96	29.46	25.02	25.87	25.8																					28.1	28.1	29.8	30.9	22.5	21.2	22.3	21.3	28.5	26.9	24.4	20.9	22

## Sheet: Fig 6 Sup D
Control																						Ntn1 cKO DAT;;Vgat Cre
98	136	164	449	128	114	135	106	145	149	156	99	76	82	82	138	161	109	188	140	111		202	202	228	120	220	227	323	145	164	291	107	171	105	106	95	131	141	128	133	89

## Sheet: Fig 6 Sup E
	Control																									sgNtn1
0-10	47	44	24	18	25	16	53	20	17	10	19	21	21	16	19	10	32	29	24	12	44					29	56	12	24	18	29	7	12	34	33	58	31	37	27	94	12	26	48	30	53
11-20	17	16	9	20	13	10	41	20	20	11	20	21	19	19	28	13	42	32	22	11	39					26	35	7	13	20	33	13	17	29	25	76	14	34	34	58	11	26	40	28	52
21-30	17	29	13	15	10	8	53	12	7	12	26	17	17	17	37	10	17	36	14	5	40					29	29	20	12	24	32	13	19	34	29	70	26	21	30	68	10	16	43	28	41
31-40	15	22	16	18	12	15	35	11	16	13	32	20	15	17	39	9	26	50	20	8	42					24	29	16	16	15	17	9	30	37	39	64	25	31	23	67	14	31	43	32	5
41-50	15	31	11	17	14	8	30	16	21	11	25	12	16	13	30	9	35	43	17	9	55					29	32	21	16	18	14	12	33	31	38	95	24	35	35	71	23	35	33	32	28
51-60	10	17	8	19	7	18	37	11	7	11	31	17	24	13	1	1	26	31	16	7	33					18	29	13	14	24	22	10	22	38	27	52	18	28	37	60	25	20	37	12	37

## Sheet: Fig 6 Sup F
	Control																					sgNtn1
0-10	27	34	18	27	17	27	40	13	12	7	43	16	22	8	43	14	23	12	9	8	29	24	27	8	19	11	6	10	8	42	37	40	19	41	16	76	12	12	31	17	40
11-20	16	7	13	17	7	21	60	10	7	12	26	26	22	14	26	18	15	27	9	11	33	27	24	7	11	15	15	12	8	41	38	43	18	50	22	65	32	17	26	14	47
21-30	19	8	12	15	12	11	42	14	9	6	62	13	18	10	47	40	41	12	10	12	29	26	23	6	26	12	22	5	19	27	34	57	15	52	28	80	25	40	29	18	35
31-40	14	15	11	16	5	18	39	13	5	8	44	23	20	16	36	40	30	32	11	14	31	20	18	9	19	17	30	6	12	61	40	76	26	47	22	64	28	30	38	16	53
41-50	12	16	9	10	10	16	48	15	14	16	41	20	11	13	11	13	22	30	8	10	34	24	17	21	17	15	17	11	22	69	30	68	19	39	21	81	49	44	29	12	27
51-60	7	16	3	7	1	4	42	11	22	12	1	1	1	3	0	0	38	36	9	12	22	28	11	14	11	16	10	6	18	51	22	79	17	33	33	66	23	35	23	18	36
