# Supplementary material for: Netrin-1 regulates the balance of synaptic glutamate signaling in the adult ventral tegmental area
Source: eLife. 2023 Mar 17;12:e83760. doi: 10.7554/eLife.83760 (PMC10023152; doi:10.7554/eLife.83760)
Supplement: Figure 6—source data 1. [file elife-83760-fig6-data1.xlsx]

## Sheet: Fig 6 C
																														Ntn1 cko
4:30 PM		26	210.5	26.5	401	0	424	241.5	222.3	96	123	11.5	218.5	0	3	551	74.5	126.5	526.5	0.5	672.9	303.5	553	114	469	258.12	388.5			9.5	35.07	0	188.5	256.67	136	611.5	493.5	366	0	466.5	355.5	250	444.5	405	7	346.67	998.58	612	493
4:45 PM		2.5	13	3	136	162	215	11	306.58	78	60.5	4.5	107.5	7.5	1	651.5	0	17	350.17	116	524.5	110.58	641.67	63	389.17	197.6	459.5			11	72.55	10.5	435.17	300	84	591	601.5	369	0	728	200.5	424	400.5	284	3	359.17	585.33	615	582.67
5:00 PM		0	60	79	312	261	27	0	224.87	144	0	52.5	36	103	7	700.5	1	57.5	31	184	546.67	3	535	24	551.83	324.42	264			141	90.27	124	488.17	55	148	738	397	184.5	4	518.5	129.5	236	607	279	63.5	190.5	363.67	513.5	629.67
5:15 PM		0	271.75	101	241	325	247	3.5	50.67	20	22.5	11.5	0.5	449.5	235	586	1	483	1	146.5	425.17	212	503.5	1.5	319.33	203.58	413.5			115	0	142	157	2	206	528.5	87	152	8.5	502.5	15	46	338	199	228.5	152	450.83	497	631
5:30 PM		1.5	1	36	50	198	31	3.5	20.17	3	288.17	4	0	418.5	218	789	11	368.5	39.17	8.5	344.17	112.83	514.83	146	236	113.67	183.5			54	77.13	22.5	6	6	24	566	6	187.5	236.5	267	0	59	574	34.5	500	409	567.67	612.5	570
5:45 PM		247	103.5	22	181	165	177	1	4.67	0	175	144.5	310.17	381	67.67	343	287.5	164.5	441	1.5	393.67	121.5	453	122.5	79	63	129.5			3	46.02	9	0	356	117.5	297.5	1.5	31	199.5	177	214	289	438	118.5	388.5	81.5	103.5	293.5	632.17
6:00 PM		303	3	0	344	270	196	3	22.17	36	33.5	106.5	143	548	58.5	27	216.67	64.5	608.5	0	394.17	79	334	37	10	28.1	12.5			1	2.5	0	2	409.17	12.5	12	2.5	104.5	132	84	235.5	116	475	13	361	73.25	9	114.5	327
6:15 PM		141.5	78.5	9	505	417	0	2	1.67	7	0	4	6	40.5	3	2	3.5	16.5	473.5	0.5	343.5	7.5	112.5	2	122.5	200.42	71			0	1	0.5	0	243.67	150	0	231.5	121.5	3	169	183	256	665	25	128	6	0	23	483.67
6:30 PM		76.5	1.5	1	375	377	12	5	86.8	0	2.5	0.5	15	0	1	17.5	0	34	31.5	18	67	16.5	370.17	1	23.5	18.27	83			9	5	0	35	47.5	114.5	1	353.5	62	87.5	207.5	111	332.5	718.5	230	636.5	101	53.5	313	246
6:45 PM		10.5	33	7.5	352	269	246	426	307.32	10.5	0	47.5	0	46	94	410	0	2	0.5	3.5	0	110	327.4	144.5	123	2	65			45.5	28.43	115.5	274	0	51.5	25	232	27.5	156.5	397.5	127.5	279.5	697.5	232	517	28.5	2.5	163	282.67
7:00 PM		554.5	296.5	596.5	401	539	333	588	135.55	56	20	34	17	444	394.5	675.5	20.5	317	0.5	141.5	58.5	8	329.5	21	46	146.27	185			299.5	19.88	95.5	186.5	143.5	174	170	27.5	318.5	268	320	301	479	1202	309	631.5	39	10	138	417.5
7:15 PM		544	562.5	578	403	793	39	379	254.78	171	216.17	28	464	409	243.5	700.5	140.5	440	218.67	88.5	122.5	119.5	316.17	183	273	201.85	337			407	97.63	195	150.5	338	168	583	3	223.5	199	361	234	384	799	184	528.5	60.67	137	602	586.17
7:30 PM		373.5	537.25	542	346	476	57	509.5	98.67	298	376	292	592.33	607	301	482.5	465.5	611	600.83	6.5	388.5	706.5	292.5	246.5	324	326.35	352			222.67	271.38	180.67	203.5	506.67	206	642	284.33	248	289.5	240.5	524	313.5	793	329	366	271.17	636.83	532.5	501.67
7:45 PM		532	734.5	431	460	483	346	376	0	274.5	152.5	188.67	688.5	854	222	685	599.5	611.5	646.5	6.5	303.83	430.5	423.5	289.5	460	236.58	343			192	192.98	431.5	345	814	237	733	559.5	368.5	476.5	229.5	382.5	500.5	698	264	478.5	223.67	973.17	640.5	482.67
8:00 PM		288.5	656.5	497	411	626	298	398.5	24.28	306.5	257.5	282	589.5	400.5	12.5	831.5	434	633	445.33	175	294.5	425.08	425	203	467.67	254.75	346			285.5	111.2	257	246	682.33	208	594	461	306.5	518	231.5	210.5	462.5	928	251.5	372.5	132	703.5	654	585
8:15 PM		444.5	463.17	506.5	590	394	344	288.5	196.35	157	311	323.5	581	618	44	464.5	410	744.5	669.33	212.5	274.83	290.17	458	304	381	213.85	351			227	237.65	333.67	210	852	221	672	501	401	364	287.5	396.5	395.5	793	401	517	349	748.33	432	553.67
8:30 PM		408.5	407.5	338.5	461	358	417	448.5	303.95	126.5	280.5	253.5	711.67	758	319	802	471	534.5	744	253.5	450.5	540.17	545.67	418.33	367	229.43	581.5			428.5	278.88	351.17	328.67	582	299.67	691	622	194	284	329.5	392.5	517	912	242	369	237.17	679.67	514	723.4
8:45 PM		568	278	38.5	454	850	372	452.5	330.3	29	308.5	264.17	657.5	715	249.5	710	361.5	711.5	882.33	163.5	540	480	515	311	397	333.42	495.5			366.5	166.83	422	904.32	921.5	157.5	567	471	393.5	559.5	270.5	301.5	466	824	289.5	358.5	249.5	995.17	496	572.5
9:00 PM		568.5	58.5	32.5	508	642	331	250	149.12	27	14.5	278	671.5	659	9	622.5	543.5	562	615.17	142.5	562.67	428	419.5	269.5	281	246.47	424.5			279.5	93.55	365	492.5	431	307	658	167	157.5	406.5	133.5	405.5	463.5	863	413	489.5	353.08	565.58	603	559.5
9:15 PM		449.5	775	197	387	528	641	485.5	11.33	30.5	26	76	575	533	4	473.5	494	657	775.33	190.5	426.17	497.83	623.17	341.67	482	261.4	279.5			344	51.28	326	422.5	839	205.5	864	645	313	758	647	350	365.5	708	218	342	131	990	527.5	465
9:30 PM		318	665	486	506	525	384	454	0	1.5	384.5	240.5	796.17	608	227	546.5	530	503	581.5	118	160.5	526.67	580.5	394.5	438.67	121.68	391			240.33	80.62	265	327.67	838.5	394.5	606	445.5	192.5	405	205.5	382.5	412	1088.5	498	534	358.67	759.5	427	495
9:45 PM		367	341.75	92	363	572	417.5	266.5	4.67	6	260.5	385	852.17	771.5	353	525.5	479	637	649.33	186.5	523.5	862.33	351.67	334	343	231.72	210			343.33	78.75	410	324.5	450.17	153	646.5	322.5	360	381	32.5	479.5	426	880	224	392	404.17	855.5	476.5	651
10:00 PM		175	149.5	76.5	525	420	427.5	395	56.85	212.5	156	445.67	801	613.5	308.5	606	419	467	540.67	108	463.67	611.53	338	359	512	354.67	360			385	30.75	521	254.5	544	220	775	478	338	372.5	298.5	271	474	898.5	488.5	668	170.5	820.75	564	604
10:15 PM		112	44	80	595	617	385.5	294.5	311.98	311	10	36	796.17	362	65.5	729	172	600	107.25	42	499.17	548.33	278	460	394.5	473.85	387			302.5	7.33	364.83	214.5	671.5	240.17	703.5	543	31.5	243.5	1	176	495.5	901.5	241.5	510	221	673.17	520.5	562
10:30 PM		421.5	632	47.5	630	470	266.5	79	128.58	301.5	181	108	878.5	504	8	627	257	441	1	0	405.33	395	524.67	190.5	460	351.3	269			315	254.67	370	219.5	619.17	256	648	307.5	143	483.5	195.5	489.5	370.5	921.17	331.5	479	104.5	733.5	727.5	714.67
10:45 PM		358	380.42	53	544	516	268	361.5	316.38	37	223.5	333.33	744	767.5	0	647	17	754	2	1	216.5	811.25	452	257	429.5	133.08	342.5			236.5	166.97	359	82	530	304.5	764.5	237	51	265	35	105.5	354	801	253.5	380	72	481.67	561	541
11:00 PM		258.5	314.5	23.5	664	519	117	58	493.15	62.5	17	139.5	850.17	758	0	538.5	25	577	205.17	4	378.33	730.17	629	7.5	375.5	426.73	358			313	102.13	210.5	14	524.17	169	596.5	432.5	94.5	322.5	127	286	246	685	156	618	196	741.17	532	431
11:15 PM		479.5	525.25	47.5	570	365	6	0	160.6	34	106.5	1	772.5	482.5	23	741.5	25.5	579	763.83	105	341.83	458.67	534.5	13	391	273.57	217			200	74.47	236	7	534.5	188	618	12	103	171	23	225.5	155	780	93	349	4	632.67	422.5	629.67
11:30 PM		241	502	68.5	642	488	0	244.5	189.03	8	317.33	1	746.5	709	4	707	157.5	655	243.92	122	222	419	642.5	232.5	600	277.4	172			289	24.17	232	15	454	108	656.5	0.5	1	253.5	0	88.5	3	832	151	567.5	28	687.57	487.5	564.67
11:45 PM		260	173.5	0	789	465	32	174	321.45	9	78	102.5	736.83	444.5	0	660.5	117.5	604	525.67	130	358	431.67	457.5	267	329.33	92.87	54			296	1.5	248	3.5	416.5	234	635.5	176.5	0	154	3.5	277.5	0	756	29	320	113.5	905	459	475
12:00 AM		159	544.5	27.5	564	405	64	336	12.83	15.5	21.5	115.5	535	462.5	129	718.5	489.5	523	476.75	125.5	0	784	747.5	177	647.83	58.17	80			254.5	1	232	58.5	585.17	119.5	536	438.5	79	80	35.5	36.5	5	718.5	9	14	55.5	749.33	602	537.5
12:15 AM		18.5	390	49	847	504	185	412	7.67	52.5	1	0	764	393	96	641.5	609	623	542.83	216.5	34	542.5	497	212	363	42.67	26.5			377.5	2	176.17	16.5	628.67	100	684	443.5	0	1.5	54	0	0	820.5	3	4.5	49	692.75	534	577.5
12:30 AM		298.5	69	0.5	734	541	2	344	9.33	0.5	14	0	1010.08	564	40.5	773.5	711	500	466	126.5	11	841.33	536	209.5	573.67	29.92	32			245	42.52	136	182	637.67	112.5	540.5	272.5	0	1	89.5	72.5	174	899	5	0.5	112	271.67	210	693.33
12:45 AM		162.5	569.25	119.5	952	409	21.5	448	3	2	55.5	0	764.33	425.5	254	705.5	812	489	92.5	86	7	872.83	556	304.5	309.5	15.42	8			320.5	0	17.5	261	450.33	14	546.5	2	12	3	10.5	138.5	176	892.42	7	17.5	1.5	586.08	636	590.5
1:00 AM		422.5	425.5	39	852	353	79.5	298	219.08	146.5	0	1	573	141	320.5	660.5	388	542	778.92	29.5	27.5	405.5	534	200.5	323.5	0	18			353	23.83	0	170	551	1	659.5	0	30.5	0	17	7	312.5	1062	89	0	4	262.5	651.5	423
1:15 AM		333.5	371	502.5	725	429	29.5	345.5	303.27	189.5	39.5	53.5	956.25	0	143.17	862.5	782.5	493	502.33	143	118.5	859.5	662	278	363.5	171.93	6			248	121.1	0	181	540.67	2	480.5	149	110	82	49.5	57	198.5	882.5	116.5	20.5	7	3	466.5	654
1:30 AM		531.5	175	977	862	422	0	314	274.2	283	89	256	653	8.5	11.5	491.5	941.5	864	899.5	108	282.5	836.67	566	107	10.5	245.37	52			274	192.27	37	91	422.33	63.5	584	478.5	18	56	29	9	28	856	157.5	207.5	22.5	0	430	655
1:45 AM		448	297	824.5	808	591	0	59	229.68	232.5	201	393.25	840.33	4.5	27	602	748.5	638.5	380	130	329.67	841.17	356.5	258.5	0	265.7	491			179.5	125.87	49.5	7	531.67	38.17	493.5	476	86.5	120	187.5	2	1.5	1006.5	212	303	218.67	0	588	583.5
2:00 AM		421.5	126	262.5	1013	510	11	4	345	186.5	133	303	782	131	0	931	701	656	186.5	118	162.5	839	574.5	156	2	356.8	357.5			143	192.48	101	64	355.33	2.5	613.5	324	62	264	217.5	181.5	101.5	840.5	318.5	578.5	432.93	0	477	538.5
2:15 AM		405.5	14	352.5	955	363	22	14.5	231.99	171.5	0	231.5	720.5	612	13.5	401	587	485.5	2	143.5	448.17	439.17	625.17	173.5	0	197.08	349.5			53	267.43	54.5	18	422.33	30	286.5	642	232.5	373	441.5	168	151.5	862	379	364.5	209.17	68.67	2.5	761.67
2:30 AM		390.5	7	133.5	848	355	107.5	7	376.23	459.5	0	110	711.5	537	10	430.5	901.5	674.5	0	248.5	452.5	1037.58	623.17	85.5	41.5	102.33	346			0	171.08	0	3	139	14	550.5	309.5	128.5	258.5	84.5	97.5	139	1026	152.5	435	253	1	11.5	636.5
2:45 AM		483.5	34.5	6	813	253	28.5	4	126.27	198.5	0	5	687.67	470	180	444.5	742	650.5	3	238	231	736.67	619.5	1.5	279.5	284.1	326.5			5	194.12	0	8.5	1	78	237	331	0	247.5	0	8	209	804.5	171.5	639.5	259.33	32.65	3.5	441
3:00 AM		401.5	0.5	23	838	314	2	1	20.33	6.5	1.5	6.5	441.33	435	2	679	674	559	36	258	366.67	760.5	748	0.5	354	26.33	234			195.5	17.08	1.5	7	8	165.17	9	306.5	1	171.5	18.5	1	235.5	630	6.5	243.5	289.83	0	100.5	597.5
3:15 AM		431	15.5	9.5	503	385	4	0.5	0	29	0	5.5	287	433	9	745	586.5	429.5	284.5	58	349	716	496.17	23	193.83	0	28.5			18	1	5	99.17	2	187	0	346.5	0	97.5	239	157.5	165	22.5	12	65	256	0	556.5	839.5
3:30 AM		510.5	293	22	744	277	333	261.5	9.33	242.5	113.5	3.5	87.5	380	15	576	687	277	327	172.5	396	893	774.33	0	59	0	61.5			0	0	1	94.5	22.5	281.5	0	5	34	14	95	93	323	2	97	1.5	123.5	2	577	538.67
3:45 AM		503.5	133.67	138	579	402	473.5	425	7.67	20.5	0	0.5	0	302	2	595.5	419.5	14	90.67	136	504.33	508.42	331	22	35	106.45	0			1.5	5.73	2	38	8	33	10.5	3	1	1	2	0	145	0	13	3	6	2.5	579	315.5
4:00 AM		344	9.5	216.5	762	155	530	528	4.67	0	21	23.5	0	475	120	941	449.5	7	1	199.5	477	236	316.5	0.5	0	0	6.5			82	4.07	45	26.5	6.5	14	3.5	3	4	1	6	0.5	128	2.5	3	5.5	72	5	568	88.5
4:15 AM		435	0	337	550	0	311	463	48.33	0	0	45.5	0	362.5	31	310.5	405.5	10.5	34	182	378.5	9.5	46.5	21	0	13.5	20.5			36	0	146.17	5.5	243	25	1	15	2	68	23	127	1.5	1	4	25	0	361	481	3
4:30 AM		262	24	95.5	697	3	231	461	231.13	15.5	0	3	1.5	259	2.5	2.5	218	6	660	101	357.67	6	139.5	116	1.5	0	14			0	2.67	163.5	27	377.83	40.5	7	12	0	233	96.5	6	0	27	10	0	1	350.33	595.5	0
4:45 AM		51.5	2	208.5	545	0	121	614	59.35	0	11	0	246.67	160	140	0	3.5	472	460.92	210	333	114.5	1	209.5	0	77.35	1			0	1.67	101.5	0	633	33	148.5	0	37	255	1	1	2	383.5	136	8	24.17	710.92	491.5	1
5:00 AM		427	95	30	26	1	76.5	300	25.17	10	329	12.5	183	0	279.5	0	21	600	258	164	605.67	1.5	0	232	33	141.68	66			23.5	23.8	76.5	0	276	208.67	568.5	35	331.5	277	0	57	130	484	148	161	0	725.83	25	17.5
5:15 AM		417.5	310.5	0.5	0	41	4	192.5	0	89	220.5	235	550	0	412	33	4.5	403	413.5	40	489.5	2	12.5	157.5	13	177.52	74.5			87	172.55	94.5	16.5	453.67	148.5	558	327	363	111	60.5	220	228.5	767	185.5	297	0	749.5	45.5	207.5
5:30 AM		376.5	168	2	7	40	25.5	18	0	50.5	350	269.67	395	123	546.5	0	0	536	561	5	510.33	140	50.5	141	4	183.68	185.5			47	55.74	7.5	60	489.75	89.5	562	353.5	157	5	0	277	274.5	585	31.5	374	28	713.92	342.5	578
5:45 AM		449.5	307.5	73.5	0	20	2.5	1	5	1	393	357.17	318.5	0	426.5	0	11	420.33	483	1	523.33	5	31	182	220.67	0	328.5			281.5	80.14	1	66	476.5	393	614	529.17	32	113	31.5	432.5	187	684.5	0	409.5	130.5	859.5	637.5	670.33
6:00 AM		338.5	310.67	613.5	0	2	18	0	0	20	497.5	414.5	151.5	1	288.5	0	9	750.5	673.33	0.5	479.17	25	7.5	410.5	232.83	9.67	291			434.5	67.6	1	9	485.5	444.5	646	527.5	0	102	0	206.5	149.5	826	4	310	323.67	318.92	622.5	424.5
6:15 AM		457.5	200	366	133	7	28.5	0	0	0	427	275.5	4.5	7	410.33	470.5	299	330	341	16.5	433.67	241	19	291	423.67	55.93	291			428.5	0	0	0	446.5	338	671	589	0	2.5	0	268	9	870.5	13	218	263.17	42	444	545.5
6:30 AM		604	134	170.5	308	68	2	261.5	94.87	117	523	151.5	4.5	20.5	104.5	545	633	17	13	0	582.58	547	77	279	225	20.67	87.5			221.5	29.1	34.5	21	408.67	391	642	485	1.5	2.5	1	8.5	1	505	28	194.5	465.5	0	841.5	543
6:45 AM		83	32	2.5	453	346	0	400	155.28	300.5	382	239.5	1	13	294	213	434	13.5	5	36.5	471.33	551.08	495.5	368.5	133.5	20.67	48			225	247.4	157	90	155.5	280.67	582.5	424	173	49	1	0	8	240	3	3	98.17	46.17	749.25	588.5
7:00 AM		610.5	4.5	0	359	386	84	404	382.08	421.5	241.5	201	4	208	118.5	192	617	8	199.33	87	411.5	880.33	684.33	189.5	27	31.17	0			93	49.15	78.5	3	4	184	412.5	254	0	0	17.5	74	11	1.5	5	5	201	1	318	563.5
7:15 AM		395	70	2.5	317	243	2	306	245.82	332.5	62	13	7	481	0	376	349	11	0	123.5	400.5	188.75	536.17	82	2	132.42	0			58	2.67	12	3	0	14	14	78.5	0	0	143.5	50.5	0	0	36	2	28	4	32.5	582.5
7:30 AM		12.5	1	19.5	95	421	0	110.5	144.8	407.5	0.5	2	41	317	0	31	154	4.5	1	203	6.5	282	593.83	8.5	32	175.18	27			0	4.67	1	62.5	0	4	4	2	17.5	3	121	0	5.5	0	160	2	0.5	150.5	1	20
7:45 AM		0	2	92	2	286	54	0	12.83	337.5	0.5	3	0	23.5	11.5	0	6	1	0	172	7	156.5	638.5	0	3	224.67	0			0	23.73	0	0	24.5	0	72	3	125.5	0	0	61	182.5	301.5	220	114	1.5	9	0	3
8:00 AM		11	29	6	14	86	0	0	8.17	122.27	5	1	1.5	0	208.33	3	6.5	315.83	0	161	0	0	509.33	69.5	1	55.17	1.5			68	0	0	2	10.5	59	2	68.5	2	2	0	27.5	145.5	648	124	68.5	9	0	2.5	1.5
8:15 AM		116	55.5	5	7	0	7	0	0	1.5	3.5	0	0	0	10	1	3	57	0	103	14	0	118.5	0	63	14	41.5			3.5	4	0	2	0	131	1	0	0	109	0	0	4	287	38	13.5	12	1	60	11
8:30 AM		0	136	1	11	1	7	155	1.67	0	0.5	22.5	71	60	0	1	6.5	31.5	44.5	442.5	2	1	0.5	8.5	17.5	9.33	1			0	31.47	0	0	0	1	0	0	0	219.5	17	0	4.5	10.5	0	0	140.5	22.25	0.5	72.5
8:45 AM		0	39	10	15	63	0	183.5	7.67	0	208.5	161.5	190	0	27	7	3	4.5	143	46	37	86.5	297.83	25.5	0	4.67	13.5			0	2.67	0	9.5	37	0	1	1	0	97	138	0	9.5	0	3	4	142.5	1	2	0
9:00 AM		0	44.5	20	0	198	23	190.5	0	132	53	0	107	1	0	4	7	5	145.83	1	5.5	190	364.5	0	0	4.67	37			0	0	9.5	1.5	0	56	0	67	166.5	1.5	33.5	5	0	0	8	7.5	121	0	0	0
9:15 AM		5.5	196.5	16	166	32	0	0	48.67	118.5	7	0	0	1	8	31	0	10	4	0	0	2.5	11.5	0	5.5	17.5	77			0	38	85	110	0	0	20	155	2.5	0	0	13	21	0	4	0	8	2	150	4.5
9:30 AM		194	14.5	111.17	735	0	239	0	182.13	0.5	0	4	0	55	4.5	88	117.5	53	2	0	106.5	0	2	77	3	11.17	20			25	6	29.5	11	0	30	188	264	0	0	2.5	53	71	388.5	14	18	1.5	0	24.5	3.5
9:45 AM		48.5	11	1.5	485	21	226	0	148.25	6.5	3	24.5	2.5	16.5	40.5	97	124.5	6	0	0	307	30.5	6	164.5	155.5	50.17	0			123	14	6	2	187.17	68	35.5	22	0	62	14	30	15	460.5	44	12.5	1.5	6	2	1
10:00 AM		0	0	1	28	15	312	0	3	11	22	0	0	0	0	0	19.5	0	0	0	371.17	13	9	360	98	120.67	0			147.5	122.63	0	0	149.17	2	0	4	27.5	6	168	0	1.5	204	102	192	0	302.58	1	0
10:15 AM		0	9.5	5	0	0	240.5	0	0	14.5	89	0	0	3	16	2	13.5	1.5	0	4	118	4	5	12.5	6	13	0			4.5	91.2	0	3	1	0	2.5	3	0	0	48.5	0	0.5	2	48	161	4.5	459.67	2	17
10:30 AM		0	20	32	2	0	27.5	0	0	235	4	10	4	0	35.5	0	4	0	0	30.5	219	0	220.5	1	3	3.5	22.5			0	0	0	37.5	1	0	0	0	103.5	2	0	3.5	9.5	4	10	13	3	21	1	267.5
10:45 AM		2	19	3	0	79	0	139.5	4.67	70	0	0	10.5	33.83	1.5	1	2	19.5	31	250.5	77	2.5	31.5	3	0	4.5	190.5			0	9.33	0	1.5	1	1.5	2	20	0	1	0	40.5	2	1	2	5	28	0	0	385.5
11:00 AM		1	256	3	2	197	5	371.5	0	2.5	2.5	0	244.33	121.5	28.5	19.5	3.5	7	250.77	95	0	43.5	7	0	37	0	33.5			1.5	0	1	1.5	0	4.5	3.5	111	0	1	20.5	2	33	2.5	2	10	3	0	2	12
11:15 AM		133.5	35.5	4	0	67	0	48	0	3.5	7.5	168	154	12	1.5	78	0.5	1	2	1	0.5	26.5	14.5	11.5	0	19.5	0.5			4	0	3.5	0.5	49	167	2.5	5.5	0	0	0	0	265	4	4	265	4.5	2.5	2.5	3
11:30 AM		220	1	5.5	4	0	10	0	23.42	32.5	38	271.08	10	0	0.5	0	6.5	96	0	0	1	6	125	31	0	82.35	17			25.5	75.2	69	9	83	45	27.5	0	0	84	139.5	0	76.5	11.5	49.5	334	210	21.5	34.5	1
11:45 AM		254.5	1	157	1	10	65	0	136.25	9.5	0	89	1	1	0	8	155.5	187.5	0	0	0	0	203.17	0	0	144.25	2			92	16	127.17	45	0	0	473.5	6	31	189.5	66.5	5	4	360	89	41	240.25	3	191	0
12:00 PM		7.5	3	74.5	10	0	4	0	296.38	0	2	0	2	34	2	0.5	116	49	0	0	1	14	29.5	2	0	17	2			91	0	37	195.5	0	3	463	185	0	12.5	1	0	0	182	167.5	4	56.5	0	2	6
12:15 PM		0	16	41	267	45	0	0	96.17	1	3.5	2.5	0	2	27.5	4	52	1.5	33	3	5	87.5	5	30.5	7	0	2			0	21.27	0	73.17	0	4	62.5	319.17	0	0	2.5	0	0	287	127	1	5	0	11.5	7
12:30 PM		0	18	3	2	0	0	0	0	23.5	3	0	3	1	0	0.5	1	7	2	2.5	15	0	78.5	0	117	1.67	23			14.5	0	0	27	23.5	45	43	203.5	2.5	2	4	15	5	4	106	1	1	0	3	0
12:45 PM		0	43.5	16	0	3	13	15	1.67	5	13	2.5	21	83	7	0	3	6	0	1.5	200	0	314.67	0	23	4.67	94.5			136	12	0	0	79.5	6	5.5	22	27.5	1	189.5	1.5	0	4	2	16	1	22	0	81.5
1:00 PM		0	0	5.5	0	1	0	0	3.5	4	0	0	0	14.5	3	5	5.5	6	0	25	209	5.5	55	18	0	42.83	404			0	39.67	0	4.5	2	2.5	1	6	0	21	2.5	5	65	150.5	1	46	1	44	10.5	74
1:15 PM		0	39	9.5	1	72	13.5	0	0	20.5	36.5	49.83	1	3.5	1	222.17	11.5	6	0	69.5	7.5	2.5	4	77.5	0	0	62			0	121.23	0	1.5	0	0	4	3.5	0	1	0	155	3	208	2	48	0	0	2	0
1:30 PM		14.5	80.17	84.5	91	310	122.5	0	0	26.5	46.5	77.33	0	2	0	494	5	66.5	204.67	181.5	4.5	0	12	56	2.5	4.67	1			0	132.47	0	3	0	9.5	0	5	98.5	0	2	285	0	6.5	2	31	0	4	7	2.5
1:45 PM		185	2.5	2.5	2	80	84	74	9.33	76	11	0	184	87.33	54.5	274	11	99.5	191.5	136.5	9.5	124	7	13	72	31.42	5			13	8	0	28.5	0	50.5	1	14	197	0	0	33.5	1	1	4	1.5	5	0	46	1.5
2:00 PM		373.5	0	10	0	0	0	0	180.92	5.5	1	0	46	70.5	194	42	106.5	10.5	313.67	56	1.5	223.5	2	0	3.5	125.35	23			86.5	12.67	0	0.5	5.5	80	0	31	0	7.5	14	24.5	0	0	61	1.5	26.5	2	389.5	4
2:15 PM		184	4	17	0	3	0	0	167.38	6	8.5	0	2.5	0	34	4.5	58.5	2.5	223.08	4.5	1	337.67	1	0	1	85.58	0.5			287	0	125	1	206	147.5	28	260	0	22	1	0.5	92	2	2	2	150.75	10	311.33	11.5
2:30 PM		0	86.5	53.5	0	0	24	0	6.33	36	7	0	0	0	85	1.5	2.5	0	6.5	2.5	35.5	45.5	60	0	1.5	172.17	47			109.5	44.37	82	8	381.17	19	1	3.5	1.5	0	0	0	36.5	23.5	4	30	0	0	147.67	252.5
2:45 PM		0	255.5	8.5	0	1	0	2	0	17	31.5	9	0	5	7	0	5.5	0	0	4	4	17	6.5	0	17.5	0	30.5			63.5	155.47	44	5.5	195.17	0	0	3	5	2	19.5	144.5	0.5	16.5	19	178	0	4.5	11.5	123
3:00 PM		0	17.5	20.5	15	24	0	356	18.67	0.5	317	0	1.5	28	1	5	7.5	100.33	0	5	0	0.5	4	3.5	5	0	0			1.5	2.67	0	3.5	116	51	183.5	1	37	0	69	277	2	22	24	6	44	0	0.5	1
3:15 PM		2	0	67.5	4	0	0	286	9.33	0.5	397.75	0	258.5	22.67	0	9	2.5	78	0	0	32	2.5	10.5	6	3	4.67	2			0	1	0	11	3	55	611	1	0	6	0	52	2.5	14.5	134	3	0	112.17	2.5	0
3:30 PM		1	5.5	1	46	0	193	16	0	1	250	0	46	0	3.5	0	61	0.5	2	1	138.5	0.5	73	159.5	2	40.1	0			0	29	0	0	3	75	589	44	4	210.5	0	3	29	317	255	3	0	49.5	0.5	4
3:45 PM		0	22	3	313	7	85	22	133.47	69	71.75	202.67	0	8	0	172	230	0	2	33.5	256	8.5	147.5	43	3	19.67	19			0	3.33	0	142	4	2	466	314.83	9	192.5	0	5	6.5	524	169	7	0	354	0	1
4:00 PM		0	0	121.5	398	17	1	0	180.3	118.5	7.5	55.5	0	4	48.5	70	39	7	3.5	79.5	263	54	8	1.5	141	0	2.5			1	10.67	3	54.5	0.5	18	502.5	157.5	26	40	35	122	203.5	618.5	126	29.5	1	294.67	11	26
4:15 PM		14.5	103.5	45.5	367	0	0	0	13	1	7	0	3	19.5	31.5	6	10	5.5	45.83	161.5	10	1	2	0	381.67	0	0			24.5	0	118.5	48.5	1.5	23.5	420	23.5	0	4	28	60	190.5	374.5	20	121.5	157.5	540.17	34.5	23
4:30 PM		342.5	108	12	270	170	0	0	17	1	1.5	0	21	111.5	4.5	4	4.5	116	2	5	0	0	164	6.5	289	17.5	45			94.5	33	215	7	14	62.5	292.5	274.5	3	19	3	71	14.5	245	4	324.5	72.5	39.17	18.5	3.5
4:45 PM		123.5	6	3	87	238	165	0	0	10.5	1.5	0	0	284	11	10	1.5	340	2	0	10	6	256.5	121	18	84.6	87			185.5	203.7	26.5	5	192	2	13	2	7	0	0	1	0	1.5	4	96	5	0	0	9.5
5:00 PM		1.5	0	33	328	393	5	0	14	49.5	3.5	0	4	92.5	2	24	21	236	2	0	26.5	24	127	57	2	0	53			57	14	20.5	23	14	9.5	0	0	181	0	16.5	0	8.5	302.5	18	65.5	11	1.5	5.5	2.5
5:15 PM		0	0	11	19	304	0	6	44.73	1	0	21.5	7	2	6.5	3.5	4	9.5	0	11	324	48.5	29	0	2	15.67	3			132	0	0	5	12	24.33	0	4	344.5	1	0	8	107.5	408	55	2	1	4	44.83	77
5:30 PM		11.5	63	158.5	2	58	2	89	69.43	8.5	48	7	417	0	179.5	93.5	3	4	0	83.5	26.5	101.5	10	1.5	4	61.18	15			46.5	54.97	0	2.5	67	53.5	19.5	2.5	245.5	20	2.5	103	131	409.5	38	4.5	3	0	1.5	0
5:45 PM		104	5	10	263	0	19	450.5	272.55	42	340	224.5	24.5	13.5	12.5	150	62	3.5	67.58	125.5	0	119.5	48	4.5	11	4.67	1			65.5	56.05	12	81	449.67	4	70	24.5	201.5	25.5	0	10	1	215	3	11	94.75	7.5	10	0
6:00 PM		0	18.5	2	201	5	14	362.5	91.1	3	411	382.5	0	4	3	2	654	7	656	59.5	1	59.5	297	52.5	8	9.33	8.5			0	5.5	51	10	131.17	20.5	2.5	291	61	0	6.5	2	0	0	11	15	58	1	17.5	295
6:15 PM		13.5	28.5	127.5	357	0	0	70	304.85	22.5	400.67	285.5	23.5	30.5	1.5	8	647.67	0	475	0	4	2.5	62	81.5	0	30.83	12			1.5	14.17	9.5	8	225	76.5	0	134.5	47.5	0	43	64.5	0	53.5	49	170.5	69.5	50.57	228.5	232
6:30 PM		174.5	74	7.5	272	0	0	1	141.67	19	22	41	18	297.5	157.5	6	405	346	382.83	0	24.5	1.5	5	93	31	23.33	147.5			0	13.33	0.5	14.5	1	9	0	0	94	33.5	22.5	4.5	41.5	678	240	348.5	0	1	462.5	544
6:45 PM		461.5	183.5	175	455	109	89	10.5	24.33	327	218	14.5	0	642	184	6	355	37.5	2	0	180.5	63.5	63.5	12	18	99.7	46.5			96.5	1	8.5	101	2	85.5	246.5	3	40	25.5	2	12.5	49	613	366.5	335.5	18.5	0	24.5	390
7:00 PM		585.5	326.5	630	513	269	2	10	26.77	434.5	1	31.5	84.5	501	214	398	23.5	575.83	3	28.5	199.5	2	18	42	0	96.67	23.5			198	80.02	3.5	100	29.5	222	648	280.5	94.5	92	68.5	40	1.5	787	356.5	426.5	76.8	41.25	190	336
7:15 PM		323.5	292.5	380	448	270	338	26	278.28	328.5	293	311.17	845	165	314.67	565	15	577	2.5	131	192.5	71.5	187.5	14	298	152.25	193.5			318	264.37	115	174	447	170.5	621	516	129	177	110.5	275.5	164	528	230	489.5	315	545.17	297	503
7:30 PM		435.5	207.5	587.5	382	275	258	477	434.93	308	118	421	666.67	213.5	330.5	627	106.5	553	314.67	257	240	196	393.67	143.17	584.5	319.45	291.5			297	194.2	161	194.5	499.83	268	497	560.5	215	142.5	217	443	132	736	228	343	111	777.33	618	525
7:45 PM		245	588.5	200.5	376	315	304	477	471.83	404.5	484.5	318.67	841	583.5	326	581	676	525	649.17	268.5	272.5	354.25	330	285	507.5	229.33	255.5			261	229.1	169	160	388	184.5	363	521	104	285.5	239	287.5	174	804	317.5	341	375.33	609.67	612	498.5
8:00 PM		431	398.5	523.5	442	337	250	577.5	586.58	301	623	384	715.83	507	484.5	477	699	485	667.33	419	203	334.5	274	56.5	250.83	300.3	251			256	184.77	122.5	184.5	544	209.5	601.5	731.5	262	257	144	153.5	135	800.5	224	564	376.67	809.5	608	338
8:15 PM		240.5	332	843	491	277	286	603.5	619.02	431	364.5	406	679	533	304	694	852	340	569.83	118.5	244.17	398.5	424	188	383.5	308.23	191.5			449	197.98	102.5	147	380.67	168	452.5	552.5	281	149	332	356	67	746.5	348.5	374	155.5	636.33	423.5	558.5
8:30 PM		209.5	68	299	461	310	295	565	531.17	351.5	511.5	288	478	713	414.5	739	680	306	749.42	422.5	347.5	667.17	364.5	185	505	276.37	303			383	200.63	18	154.5	442.17	278	476	547	248	169	211	386	305	586	372	473	327	509.5	386.5	493.67
8:45 PM		135	221	144	261	380	310	643.5	419.62	363	309	446	588.5	342.5	118	657	640	514	535	283	187.17	474.5	383	35	516	325.77	410			271.5	136.27	1	215	551.17	233.5	547.5	801.5	189	283	119	339	223	724.5	273	576.5	368.33	725	655	473.5
9:00 PM		444.5	321	10.5	229	319	280	548	481.13	303	436.5	332	479	550	2	450	625	298.5	468.67	327.5	204	561.75	360	94.5	245	227.57	265.5			85.5	212.03	2.5	109.5	318.5	219.5	666.5	554.5	140	78	213	67.5	46.5	579.5	366	469.5	130	872.33	417.5	521.17
9:15 PM		329.5	196	138	297	311	337	380.5	438.03	487	464.25	391.5	465.5	617	77.5	503.5	666	26	467.5	212.5	387.33	735	352	86	491.67	292.7	292			378	183.72	64.5	140	550	302	630	569.5	330	172	183	321	48	780	402	306	311	646.67	398.5	680.5
9:30 PM		310	204.5	274.5	639	196	257.5	596.5	402.03	396	173	136	243.5	474.5	274.17	517	770.5	260.5	537	332.5	293.5	769.5	371	320	428.67	384.27	335.5			461	178.28	132	11	445	312	381	505.5	282	65.5	97	359.5	0	737	260	358	293	677.92	407.5	346.5
9:45 PM		378.5	223	269	455	342	304.5	437	337.42	788.5	17	327.5	11.5	370.5	46	437	837.5	308	574.33	213.5	166	336.17	294	92	350	175.77	302.5			238.5	156.27	75	9	472.5	416.5	684	728.5	259.5	23.5	11	312	43.5	816	353	611	349	822.5	578.5	531
10:00 PM		172.5	432.5	295.5	590	336	326	321.5	251.8	419.5	379	248.67	0	829	30	420.5	638	379.5	452.33	317	211.67	374.5	392	104.5	342	317.68	160			325.5	143.47	38.5	6.5	362	321.33	567.5	442.17	186.5	1	49.5	173	298.5	590	180	248	102	402.5	409	598
10:15 PM		170.5	368.75	147	634	299	400.5	331	308.07	709	350	184	75	762	8.5	572	460	221	518.17	326.5	141	733.67	285	83	563	139.8	273.5			317	105	56	137.5	433.67	408.5	381.5	470	212.5	18	7.5	274	128.5	731	356	749	214	808.67	505	436
10:30 PM		367.5	275	230	318	263	129	472.5	216.57	279	485.17	544	11	582	207	424	668	547.5	254.5	310	285.5	667.75	419	53	218	176.5	327			443	70.37	1	121.5	311.5	257.5	513	598.5	113	37	37	75.5	101	737	158	526	32.5	479.67	478.5	268
10:45 PM		93.5	210	266.5	399	450	315.5	281	396.73	597.5	353	462.5	1	273	420.5	450.5	481.5	345	79.17	420.5	168	438.33	414	73.5	591	244.02	232			285	22.87	0	0.5	418.67	326	487	487	4.5	4	126.5	43	86	639.5	116	241	26	353.67	422.5	469.17
11:00 PM		76	49	386	334	325	185.5	313	113.18	672.5	122.5	318.5	119	510	408.5	390.5	501	505.5	1.5	208.5	174.5	448.5	486	169.5	458	118.33	269			323	0	2	61	448.83	370.5	516	273	313	34	124.5	0	3	914.5	139	303	95	113	524.5	592.5
11:15 PM		415	482.25	245	435	298	155.5	226.5	179.68	458	60	38.5	555	14	404.67	824	888.5	291	0	148.5	9	314.85	279.5	371	434	50.5	89.5			213.5	104.7	0	0	273.67	306.5	417.5	440.5	46.5	23	420	175.5	1	787	3	412	27.5	0	380	710
11:30 PM		70	251	6	507	365	0	70	45.67	455	0	451.5	370	304.5	344.55	556	842	100	7.5	170	119.5	568.5	443	171.5	398	44.67	92.5			367.5	18.3	14	4	200	377.5	447.5	515	4	1	191	8.5	2	854	2	354	105	0	643	519.67
11:45 PM		283	234.5	1	314	175	0	3	6.33	379.5	14.5	538.5	311.5	402.5	441.35	308	611	503.5	220.33	181	218.67	160.92	370	57	330.67	40.1	167			387	0	60	80.5	254	408.5	520	400	155	3	493	129.5	84	789	15	387.5	72.67	20	311	494
12:00 AM		374.5	442.5	36.5	527	336	0	9.5	0	402.5	31	247	167	288	213	582	703.5	508	460.67	242	106	312	661.17	363.5	264.83	25.75	75			333	0	39	108	52	355.5	418	401	5	65.5	79.5	6	1	674	132.5	484	40	63	9.5	519
12:15 AM		297.5	316.5	34	613	231	6	336.5	4.67	399	7.5	532.5	9	1	151.5	613.5	789.5	630.5	428.83	179	200	660.5	245.17	216	375.83	16.17	12.5			181	0	9	69.5	1	382.5	385.5	413	5.5	192.5	118	56	2.5	999.5	114.5	250.5	35	11.5	28	561.67
12:30 AM		359.5	145.5	83.5	437	249	0	83	10	137	4	4.5	0	6	6	677.5	444.5	295	481.33	66	289.67	613.5	338	15	358	3.83	0			476.5	86.33	66.5	4.5	1	333.5	477.5	179	110.5	88.5	371.5	118.5	8.5	891.5	87	246.5	48.5	0	293.5	413.33
12:45 AM		234.5	152	58	168	248	22	81	7.67	502.5	0	0	26	96	35.5	697	842	378.5	690.67	25.5	191	536.67	580.67	1.5	72	81.67	9.5			281	138.33	179	3.5	23	300	383	1	45.5	78.5	210	1	113.5	681.5	4	89	69	48.5	381.5	510
1:00 AM		357	150.5	14	570	186	278	288	6.33	237.5	119.5	30	8	8.5	7	650	821.5	399.5	307.17	7	273.83	324	375	116	0.5	129.08	0			288.5	137.97	21.5	0	2	140.17	474	4	0.5	198	29	2.5	110.5	1004	1	1	291.92	489	481	425.67
1:15 AM		430.5	7.5	0	632	330	227.5	246	207.27	7.5	133.5	53.5	0	4	3.5	622	1023.17	213.5	491.08	0	23.5	200	436.5	43	1.5	200.33	70			294	63.23	110.5	2	13	110	61.5	4	28	4.5	0	33	267.5	712	1	0	415.5	758.33	379	85.5
1:30 AM		374	216.5	14.5	492	238	239.5	278	449.72	59.5	534	386	23.5	0.5	8	767	764.5	61	391.42	66.17	57.5	47.5	193.33	132	43.5	209.02	203			416	191.37	9.5	66.5	44	0	352.5	1.5	165.5	0	0	5	142.5	600.5	58	142.5	229	546	646	0
1:45 AM		391.5	538.5	77.5	329	36	7	340.5	486.67	89	496	590.5	515.5	17	32.5	485	419	3.5	514.08	258	181.5	233.25	324.17	200	2	265.78	230			194	6.5	0	4.5	342	6	499	41	2.5	0	4	0	20	1013.5	155	514	363.67	358.67	462	109.5
2:00 AM		139.5	347	290	433	0	0	198.5	403.17	0	344.5	498	540	0	76.5	674	600	5	41	226.5	273.5	49	31.5	112.5	10.5	168.85	268			166	0	1	0	372	24	563	426.5	37.5	1.5	143	15	44	531	6	523.5	180	678.07	519.5	0
2:15 AM		224	244.5	457	596	20	27	357	367.02	91.5	257.5	492	282	27.5	28	333.5	477.5	3	0	129.5	497	7	4.5	100	4	190.18	288			347	76.35	0	11	614.67	0	384	569.5	135	1	1	6	0	529	0	305.5	189.25	168.83	15	0
2:30 AM		167	129.5	335.5	320	14	2	15.5	330.42	0.5	4	257.5	387.5	94	332.5	395	3.5	113.5	30.67	286	250.83	1	55	335	2.5	36.17	172			163	21.98	26	25	351	4	551	549	6	152.5	3.5	19.5	1	274	2	373	6.5	76.5	0	53
2:45 AM		178	1	52.5	339	0	5	0	515.53	4.5	0	13	229	527	358.5	380.5	0	156	0	138	179	20	0.5	260.5	318.5	49.67	234.5			50.5	0	0	104	442.83	42.5	200	523	2	188	50.5	22.5	37.5	115.5	0	236.5	1.5	421.5	198.5	337
3:00 AM		161.5	68	1	2	0	24	0	209.15	4	2	1	345.67	683	397.5	14	9.5	162	0	358	199.67	3	29.5	120	289	21.5	61			0	1.5	0	84	295	161	414	374	1	114.5	51	184	59.5	2.5	2	5.5	100.67	16	2.5	581
3:15 AM		0	1.5	0	1	2	0	0	263.28	163.5	2	43	74.5	688	124	4.5	4.5	25	2	250	313	5	64.5	194.67	223.17	3	50.5			5	63.5	1	214.5	330.5	34.5	432	487	7	84	19	131	209	35	102	2	54.5	0	8.5	537.5
3:30 AM		6.5	0	20.5	1	70	55	0	123.97	458	0	246	3	485	2.5	10	7	1	2.5	244	156.5	55	34	28.5	92	54.5	32.5			184.5	5	0	103.5	192	238	269	448.5	75	11	219.5	237.5	217	11	190	20.5	48	19	220	449
3:45 AM		173	88.5	109.5	7	334	264	0	11.67	219	114	105	0	405	4	12.5	26.5	0	112	194	255.67	12.5	44.5	126	2.5	49.83	17.5			164	2	72	24.5	423	20	317	528.5	215.5	3	49	279.5	233	2.5	207	168.5	0	0	340	512
4:00 AM		565.5	223.5	0	18	447	151	277	5	70	356.5	11.5	7	415	0	11	698.33	14	436	272	374.5	717.17	44	1	16	65.6	3			218.67	0	24	4	91	2	195	316	6	3	67.5	207	12	34	217	435.5	41	11	361.5	529.5
4:15 AM		420.5	12	4.5	0	409	0	434.5	0	0	313.5	12.5	370	620	28	0	1332.67	6.5	547.33	284	648.5	816.83	243.5	6.5	80.67	9.33	50			247.5	13.15	145	36	7	0	2	14	13.5	21.5	151	297.5	0	1	117	421.5	52.5	449.17	471.5	446
4:30 AM		385	5	242.5	0	239	0	414	0	5	215	14	227.5	284	24.5	311	982	2.5	314.5	127	348	618.5	465.67	0	7	31.33	2.5			120.5	138.3	100.17	2	4	1	1	0.5	116	107.5	25.5	124.5	0	2.5	50	205.5	8	219.5	395	501
4:45 AM		469	21	505.5	239	262	22	350.5	0	1	111.5	3	582.5	404	165.5	569.5	1371.5	210	474.33	297.5	202.5	565.17	514	1.5	8	58.4	6.5			111.5	112.08	81.5	13.5	85	115	0	1	222	119	164.5	368.5	18	0	0	397	1	150.5	154	90
5:00 AM		372	18	206	467	178	220	379.5	4.5	0	1	8	382.5	385.5	404	634.5	613.5	269.5	502.67	16.5	542.5	473.5	420.67	0	16.5	205.12	41			6	45.43	1	2	38	193	11	9	190.5	83	93.5	19	3	176.5	1	29	1	3	20	4
5:15 AM		187	34.5	277.67	400	353	212	317	55.28	0	5.5	366.17	70	496.5	411.5	720.5	858.5	42.5	467.33	0	576	200.5	392	25.5	9.5	104.33	289			0	1	0	9.5	481	181	169.5	38.5	89.5	154.5	0	2.5	97	783	0	305.5	29	417.33	30.5	2
5:30 AM		26.5	381.5	58.5	599	164	3	79	297.55	14	2	411	4	3	135.5	687.5	843.5	0	198.5	0	87.67	157	405	120	90	251.88	249			1	128.2	0	76.5	319.75	397	714.5	695.5	5.5	48.5	0	3	75	1050	3	2	210.5	462.25	334.5	2
5:45 AM		1.5	351	4	676	0	0	58.5	308.65	139	3.5	370.5	4	0	1	581	1085.5	3	510.5	1	7	20	621.5	96.5	344	231.77	198			81	208.57	5	278	368.67	251.5	613.5	465.5	4.5	1	60	227	166	723.5	3	8	265.5	527.67	402	24
6:00 AM		17	156	0	348	0	0	19.5	339.73	344.5	367.5	245	4	0	1	798.5	1063	8	312.58	136	0	19.5	385.17	118	125	30.83	218			338	188.17	3	206	352.67	164	401.5	611.5	0	3	2.5	270	113	908	125	7.5	170.5	68	503.5	272.67
6:15 AM		676	507	20	549	0	31	59.5	363.12	336.5	406	333.17	272	35.5	3	513.5	549	37.5	421.75	305.5	4	184.83	228.5	287	396.5	0	195			289.5	231.38	2	73.5	361.33	397.5	659	693	89	22	4.5	325	110.5	879.5	176	7.5	306	2	384	454
6:30 AM		665	75.5	201	269	100	0	1.5	199.83	87	284.83	156	567.5	282	183	755	698.5	370.5	340.75	392	36	225.5	451	175.5	15.5	7.67	49			309	105.22	196.5	5	501	343	634	520	2	168	1	51	20.5	788	368	193	224.9	1	541.5	490.17
6:45 AM		291	35.5	5.5	477	296	0	351	280.63	45	81	7	396	538	401	707	220.5	224	581.77	289.5	82.5	189.17	422.67	239	2	114.17	2			126	11	163.17	17.5	402	309	563	628	0	251.83	120	0	0	741.5	301	244.5	54.5	32.5	341.5	510.5
7:00 AM		176	13	4	250	154	0	398	224.08	88	23.5	39	422.9	316	253	413	73	337	136.17	309.5	357	122	142	182.5	59	154.92	0			8.5	8	94	2.5	56.5	349.5	540	429	55	71.5	196.5	16	33	564	113	243.5	0	220	374.5	565.67
7:15 AM		2	47	2	7	0	0	254.5	1.67	5	0	1	209.67	2	63	55.5	0	300	1	31.5	293	0	9	146	0	214.92	2			0	11.8	101	92	3	76.5	180	159	140	0	50	0	74	375.5	16	253.17	0	407.5	3.5	243
7:30 AM		0	309.17	1	3	0	74.5	84.17	0	1	10	0	1	4	5.5	0.5	2	164.67	1	131.5	280.5	0	21	136	0	18.67	3			2.5	23.8	1	30	7.5	6.5	41.5	110	3	0	225	0	0	89	9	0	5.5	167.17	0	84
7:45 AM		0	24	4.5	0	0	310.5	0	9.5	2	7	192.5	1	0	2	7.5	0	44	1	0	433.17	1	317	0	0	10.17	0			95.5	1	0	0	12.5	0	7	5	14.5	37.5	43	37	61.5	86	23.5	75.5	235	5	0	0
8:00 AM		9	3.5	94	4	0	273.5	2	0	20	1	536.5	0	0	0	25.5	10.5	4	1	5	16.5	65	86	0	0	6.83	1			2	103.75	1	2	9.5	0	1	1	55.5	21	25	285.5	80.5	391.5	99.5	68	10	0	2	0
8:15 AM		240.5	148	31.5	2	0	235	2.5	0	13.5	2	282	7	0	0	2.5	1.5	5	47.17	0	1	2	0	0	30	15.17	0			0	12.8	0	10	6.5	113.5	3	5	2	14.5	2	205	2	265	153	0	6	0	0	0
8:30 AM		328.5	5	0.5	276	77	190	0.5	6.33	139	102.5	125	5.5	21	6.5	2	4	0	21	3	3	0	0	0	28	0	63			15.5	29.6	2	0	72	0	4	21	1	33	0	58	0	2.5	9	0	1	0	7	5
8:45 AM		135	17.5	0.5	245	128	44	7	7.67	393	304	5	1	2	0	3	4	2	2.5	2	0	451.17	2	2.5	1	0	67			2.5	0	22.5	27.5	206	3	8.5	114.5	125	0	0	0	0	0	2	5	12	14	351.5	0
9:00 AM		0	66.5	58	11	1	2	0	0	161	86	1.5	2	0	92.5	0.5	2	24.5	4	15	21.5	338.67	24	4	9	3	1			0	0	0	213.5	62	2	25	352	0	5	1.5	0.5	0	0	5	13	80.5	0	2.5	0
9:15 AM		10.5	0.5	13.5	1	0	1	0	142.92	122.5	0	0	36.5	26	0	45.5	0	110.5	3.5	2	11.17	160.83	147	0	1	80.83	1			17.5	0	0	8	0	3	356	272.5	0	0	41	0.5	21	24.5	4	141.5	0	0	0	50
9:30 AM		352.5	8	0.5	1	1	1.5	0	282.28	98.5	2	5.5	555.17	449	0	322	194.5	16	11	60.5	6.5	0	503.5	55.5	1	162.85	0.5			277	0	1.5	5	0	0	594.5	252.5	0	0	0	0.5	0	5.5	63	7.5	1.5	9	0	173
9:45 AM		5	10	2	170	24	19.5	225	140.67	0	1	0	114.17	15	0	79.5	336.5	0	516.67	205.5	189.17	37.5	257	200.5	195	12.33	0			99	0	104	2.5	3	1	234	0	95	0	5	149	1	97	3	0	143.5	73	0	4
10:00 AM		27.5	0	10	289	0	41	227.5	0	0	3	12	19.5	0	4	3	90.33	0	270.17	348.5	241	2.5	2.5	216.5	63.67	95.08	29.5			0	0	143.83	20.5	0	1	39	1	134	1.5	0	15.5	2.5	754	0	1	184	299.5	22	0
10:15 AM		0.5	95	40.5	2	0	2	206	0	6	97.08	177.67	0	0	7.5	2.5	78.5	10.5	109.67	223.5	7	33	31.5	32.5	2	4.5	216			1.5	0	70.5	2	0	88.5	4	2	1.5	19.5	2.5	90	0	310	2	0	169	204.67	2	1.5
10:30 AM		151	207.5	4.5	0	0	20.5	0	0	112.5	4	267.17	7	0	19	0	0.5	5.5	1.5	20	1	1	0	1	30	0	27			1	3.67	32.5	4	150.17	125	6	2	0	2	0	5	52	10.5	5	0.5	0	0	18	0
10:45 AM		333	104.5	2	0	2	93	0	0	42.5	2	243.5	3	0	7	2	2	5	0	0	0	3	175	0	1	0	0			0	13	1	44.6	239.5	10	1.5	0	3	6	1.5	5	176	0	3	3	0	1	0	0
11:00 AM		72.5	0.5	12	0	85	0	0	9.5	2.5	0	114	2	2	0	7	6	55	0	1	2.5	0	0	0	0	21.5	1			0	32.1	1.5	1.5	5	0	2.5	2	0	22.5	16.5	0	68.5	11	2	0.5	4	6.5	0	5
11:15 AM		0	2.5	0	210	365	0	0	4.5	0	0	0	0	0	0	1.5	0	235	3	0	2.5	0	14	0	1	0	0			20	117.13	2.5	15.5	0	0	17.5	2	1	0.5	4.5	130.5	0	4.5	79	0	149	2.5	5	0
11:30 AM		0	36.5	1.5	104	3	0	0	71.83	0	23.5	0	118.5	26	0	2	25.33	27	4	1	0	60	0	34	143	27.83	3			127	18.67	9	75.5	1	8	2.5	0	183	15.5	0	3	0	0.5	145	112	3	6.5	1	4
11:45 AM		0	0	3	0	60	92.5	0	189.57	3	45	0	36.33	224	6	0	261.83	9.5	33	0	19	66.5	101	0	14	25.43	6			7	0	2	0	0	5	4	133.5	17.5	161	0	1	1	18.5	214	184	0	43	0.5	191.5
12:00 PM		0	33	3.5	6	0	100	0	0	1	29.5	0	0	284	0	147	24	4.5	1	68.5	0	0	285.5	6	0	0	23			0	5.33	163	7	1	59	0	409	1.5	103	3.5	0	2	2	110	217.5	4.5	133	1.5	247.5
12:15 PM		2.5	86.25	0	4	0	0.5	0	0	2	2.5	6.5	0.5	2.5	2	122.5	0	0	0	309	10	0	3	0.5	0	4.67	1			0	17	5	134.5	22	0	9	457	4.5	8	0.5	0	163	0	11	6	0	233.33	0	78.5
12:30 PM		5	22.5	0	8	11	0	46.5	0	3.5	0	5.5	0.5	0	0	0	6.5	67	0	298	244	1.5	8	13.5	1.5	4.67	2			1	6.67	130.5	60.5	259.5	4	0	163.5	55.5	5	31.5	0	21	162.5	0	2	0	62.5	2.5	4.5
12:45 PM		9.5	12	105	45	0	1.5	214.5	0	5	73	122	123	0	56.5	7	0	1	2	135.5	337.17	9	9	4	2.5	19.17	196.25			1	16.67	0	0	232.17	0.5	0	15.5	0	0	222.5	0	0	161.5	2	2	121.5	1	144	1
1:00 PM		34.5	1.5	143	273	0	0	0	0	18.5	11.5	6	2.5	22.83	292.83	5	2.5	0	4.5	138	15.5	0	1.5	0	0	164.02	104			0	7.33	1	0	5	43.5	240.5	0	0	0	70.5	3	0	329.5	1	4	43.5	0	346.5	2.5
1:15 PM		0	29	8	202	13	4	0	0	220.5	1.5	4	0	2	98	5	0	0	0	0	0	16	52	0	25	98.33	2.5			0	17	0	4.5	1	165.5	799	3	0	0	81	10	1	2	2	12	0	2.5	263.5	0.5
1:30 PM		0	1.5	1	124	48	24.5	0	4.5	331	2	2	4	2	22.5	0	2	9.5	0	0	0	25	2.5	2	41	10.67	0			25	21	0	0	2	2	729.5	0	3	15	0	8.5	0	1.5	33	44.5	1	0	6	14
1:45 PM		171	33	3.5	4	0	1.5	0	0	43	3	50	25	1	0	0	40	57.5	0	0	2.5	23	0	36	5	0	3.5			144	50.93	0	9.5	11	0	408.5	0	7	0.5	2.5	4.5	2	2	1	84	3	0	0	177.5
2:00 PM		339.5	123.5	0	0	0	0.5	0	176.12	9.5	7	66.5	0	35.17	6	5.5	0	0	86.5	1	4	0	2	7	5	4.67	2.5			375	4.67	0	158.5	223.5	0	634.5	0	0	4	0	75	3	8.5	2	4	52	2.5	0	34
2:15 PM		195	5	0	0	12	2	0	50	7	293.33	8	1.5	3.5	3	11	199.17	0	283.17	0	0	57	17	283.5	1.5	0	0.5			188	16	0	11.5	0	0	172.5	358	0	95.5	2.5	1	0	39	53.5	6	8.5	154.5	5	2
2:30 PM		19.5	0	8	0	2	0	1.5	4.67	9.5	278.42	5	2	0	104	283	262.5	0	34.5	4	32	32.5	0	28.5	2.5	0	2.5			30	0	3	0	0	0	14	229	1	0	123.5	0	1	0	166	6	4	45	0	0
2:45 PM		0	13	128.5	0	0	37.5	202.5	0	51.5	26	3	2	0	52.5	316	74.67	8	2	23	0	18.5	2	0	0	0	0			3	0	127.67	0	0	2	0	313	56.5	0	0	0	1	0	117.5	1	3.5	16.5	10	1.5
3:00 PM		5	48	0	6	4	351	96.5	9.5	0	4	9	0	0	1.5	201.5	11	8.5	2	96	2.5	91	2.5	6	21	9.5	1			0	3.67	122.67	17.5	2	1	0	7	1	0	0	13	17.5	11	3	37	4.5	2.5	11	41.5
3:15 PM		1.5	0	0	5	95	30.5	0	0	4.5	1	3.5	26	0	19	107	2	211.5	0	429.5	1	1	44.5	0	134.5	75.33	2			1	31	2	58.5	0	13	0	1.5	38.5	4	0	175	0	289.5	0	180	4	5	22	0
3:30 PM		10	0	2.5	1	314	0	0	150.27	0	13	3	201.67	5	12.5	0	3	111	7	196.5	0	1.5	255.83	0	182	99	29.5			1	12	0	1.5	16.5	216.67	0	2.5	201.5	71.5	13	4.5	1.5	597.5	0	140	8.5	10	247	34
3:45 PM		7.5	45.25	0	168	245	0	0	71.88	18.5	1	26	49.5	18.33	146.37	2	0	19	0	472.5	11.5	0	4	3	10.5	1.5	0			0	86.47	0	3.5	189.5	177	2.5	3	55.5	8.5	62.5	8	1	297.5	0	31.5	66	11	53.5	3.5
4:00 PM		36	2	136	266	154	2	0	11.5	92	2	220.75	2	118	9.5	0	28	0	0	16.5	238.67	36.5	0.5	6.5	0	0	0			59	120.75	44.5	41	11	21.5	0	32	0	0	0	7.5	98	370.5	0	7.5	167.5	25	0.5	8.5
4:15 PM		1	1	49	357	13	32	3	0	0	0	378	0	467.67	0	4	1	0	3	0	423.5	0	0	74	0	6	0			297.5	2.67	32.5	0	0	0	16.5	175.5	0	8.5	2.5	25	109	69	1	7.5	139	10	2	1
4:30 PM		0	0	0	203	94	84	0	0	0	5	231	0	7	0	0	1	6.5	258.17	0	9.5	0	14	151.5	39.5	0	0			184.5	5.33	4.5	2	1	1	1	216	66	74.5	51.5	39	97.5	0	48	3	30.5	0	8	0
4:45 PM		5	44	5.5	205	0	8.5	0	0	2.5	364.17	2	342	0	11.5	1	3	30	166.17	0	0	0	32.5	149	0	37	43			65	9	4	2	1	3.5	347.33	1	9.5	18.5	0.5	0	0	245.5	158	116.17	6.5	3	0	10
5:00 PM		0	6	18.5	222	0	1.5	6	28	14	390	0	1	0	39.5	10	8	197.5	4	0	2	10	0	186	0	132.48	200.5			0	21.87	4	3	1	14	653	0	53	0	28.5	27	0	298.5	309	1.5	0	199	0	23.5
5:15 PM		11	0.5	49	205	0	5	402	73.82	69.5	133.5	31	0	1.5	175.5	85	1	10.5	1	3	24.33	43.33	3.5	6.5	2	0	61.5			2	0	42	2.5	11	1	460	7	2.5	5.5	105.5	7	4.5	5.5	57	1.5	3	308	18.5	409.67
5:30 PM		343	35.5	1.5	4	43	2	190	3	99	11.5	8	0	95.5	30.5	108.5	0	2.5	0	15.5	133.33	1	1.5	0	11	0	2			0	10	74.5	63.5	127.5	130.5	406	2	0	45.5	0	0	0	2	4	8.5	20.5	408	68.5	382.67
5:45 PM		427	11	0.5	29	5	3	2	0	0	3	16	1	325	0	88.5	14.5	3	5	221	265	4	171.67	8	28	4.67	29.5			6	68.03	217	194.5	160.5	4.5	454	11.5	2	0	20.5	3	0	254	0	95.5	183	176.67	0	504
6:00 PM		145.5	25.5	6	170	154	0	0	21	0	0	3	0	5	0	10.5	25.5	19	1	390	187	0	335	3.5	4.5	0	11.5			136.5	7.33	25.5	138	128	0	309.5	260	79	0	0	79.5	62.5	482	0	161	4.5	0	1.5	164
6:15 PM		67	239	23	113	13	318	0	210.1	40.5	2	67	0	0	13.5	2	560.5	213	5	172	357	127.5	326	5	0	10	0			165	13.47	7	35.5	117	12	12.5	179.5	0	11.5	9	2.5	4	447.5	0	40	3.5	0	20	1
6:30 PM		12	269	200.67	347	187	8	0	42.58	0.5	6	11	188.75	1	0	1	543.5	256	87	47.5	43.5	217.67	267.5	123	85	102.3	2			267.5	162.05	2	0	0	7.5	1	19.5	24	27.5	4	3	28	677.5	7	0	42	0	6	2.5
6:45 PM		33.5	94	70.5	278	194	3	0	0	25.5	270.5	33	303.67	260	66.5	14	599.5	416.5	227.33	321	1	600.17	82	2	44	80.43	3			125.5	39.58	43.5	29.5	2	81.5	23.83	1.5	7.5	6	26	18.5	0	804	52	1.5	19.5	54	70.5	161
7:00 PM		188	124.5	296.5	273	121	26	146.5	82.2	232.5	32	351.5	244	312	201.5	393	333	398.5	628.5	225	6.5	110.5	3	2.5	69	35	156.5			25	63.93	112.5	9.5	0	390.5	511.5	7	183.5	49	46	84	98	684	217	42.5	165.5	284.67	471.5	343.67
7:15 PM		410	391	517	298	85	13	241	327.92	189.5	53	626.5	247	647.5	542	670.5	130	314	12	1	250.33	44	45.5	42	298.5	184.83	263			405.5	222.52	153	38.5	34	340.17	661	128	189.5	175.5	191.5	244.5	129.5	582	250	477	186.5	389.67	295	554.33
7:30 PM		272	177	252.5	306	167	94	353	421.23	632.5	265	579	615.5	601.5	344.5	473.5	4	306.5	712.83	2.5	314	5	10.5	98	472	224.03	285			486.5	173.65	67.5	155	502.17	301	566	679.5	255.5	258.5	93	251	166.5	766.5	267	441.5	229	498.5	533.5	538
7:45 PM		316	409.5	502.5	320	235	222	350	297.42	590.5	526.5	623	597.5	502	238	651	1.5	215.5	358.67	64.5	341.17	25	160.5	122	360.67	92.93	180			414	249.68	145	119.17	500.33	326	626.5	765	390.5	180.5	141.5	267	211.5	619.5	163	490.5	235.5	523.5	518	415
8:00 PM		359.5	310.5	364	271	184	273	245	494.5	301.5	352	262.67	448	437.5	455	263	3	415	514.5	330.5	347.67	490	481.5	36.5	317	151	291.5			293	191.7	167.5	157.5	210	363	594.5	501	195	51.5	172	316	85.5	497.5	257	315.5	206	549.5	345.5	352.5
8:15 PM		324	156.5	158	190	144	170	320	485.48	285	350.5	558	173.5	577.5	497.5	629	76.17	280.5	643.67	266	328.5	528	410.83	106.5	192	243.8	200.5			401.5	132.1	59.5	153.5	540.67	418	735	832	279	239.5	218.5	318.5	90.5	596.5	346	316.5	138.5	718	472.5	438.5
8:30 PM		348.5	183	133	288	160	217	388	306.15	349	533	344.5	89	638.5	381	498	667	235.5	428.67	218	346.67	805.17	431	450.5	387	92.75	360			333.5	173.37	101.5	123.5	450	388	595	589	158.5	107.5	155.5	308	280	583	263.5	475.5	220.5	822.17	178	399
8:45 PM		169.5	367.75	5.5	6	268	187	237.5	356.27	451.5	341	396	0	482.5	175.5	328	645	39.5	661	51	305.5	167	521.17	235.5	264.33	207.43	144			477	165.08	63.5	22.5	456	210	398	775.5	305	53	28.5	261.5	173	703.5	161.5	436.5	135	306.83	373	455
9:00 PM		267.5	159	329.67	57	242	143.5	324	288.65	424.5	371	444	17.5	156.5	159.5	575	684.5	2.5	617.17	306	203.67	553	524.5	376.5	71.33	251.52	150			337	59.6	55	0	468	389	617.5	557.5	207	128	181.5	243	113	687.5	218	305	1.5	843.67	308	478
9:15 PM		159	155.5	78.5	316	181	92.5	171.5	170.95	194	281.5	27	21.5	673.5	2.5	379.5	343.5	20	382.5	96.5	307.67	244	512	263.67	279.67	93.58	242			295	149.33	87.5	7	477	276	635.5	713.5	260.5	7	107.5	203	104.5	863	323	544.5	279.5	600.33	254	419
9:30 PM		335.5	90	136	381	162	184.5	180.5	92.15	133.5	431.5	4	8	490	0	373	405.5	40	632.67	0.5	226.5	123	373	236	412	43.1	204			368	96.44	149	185.5	423	295	506	343.5	303	64	30.5	238	2	623	185	537.5	251	351.67	73	467
9:45 PM		16	94.5	459	211	202	229	46.5	12.33	120.5	509	197.5	19.83	517.5	9	352.5	3	470.5	61.5	4.5	158.5	16	404	211.5	190	5	224			116	152.35	1.5	172	301	415.5	592	617.5	171	2	3	236.5	0	771	170	168.5	199	711	9	526
10:00 PM		198	30.5	220	445	154	237	0	22.33	311	417	496.5	382	513.5	60	98	215.5	202.5	103.5	3	322.5	273.5	506	134	55	13.83	188.5			393	109.22	0	59.5	482.5	211.5	404.5	523	177	3	26.5	217.5	17.5	539	326	642.5	48.5	469.67	270	510
10:15 PM		248.5	6.5	37	187	137	175	1	383.15	667	178	413.5	268	491.67	24	10	550.67	221	4.5	94.5	311.17	535.42	311	25.5	0	152.7	229			418	57.2	3.5	2	321	263	663.5	450	98	17	0	117	43.5	814	212.5	432	4	930.5	436	419
10:30 PM		316	46.5	155	255	39	221.5	24.5	330.67	512	453.5	382.67	149	4.5	220	0	745.5	178	10	184	200.5	730	359	388.5	3	302.2	180.5			303	15.27	61	95	143	249	520	520.17	140	21	0	246	66.5	731	258.5	417.5	88	311	377.5	545.5
10:45 PM		339	495.5	178	269	33	159.5	0	100.83	75	405.58	416	1	6	514	5	616.5	199	2	224.5	213.67	433.67	407	217.5	5	122.63	141			262.5	0	55	0	326	143.5	463	284	17.5	2	110.5	260	129.5	976	188	168	315	660	271	493.5
11:00 PM		306	460	12	97	0	308.5	14.5	66.85	334.5	536	208.5	4.5	0	212	0	735	201	341.5	165.5	376.67	583.17	509.5	627.67	395.5	310.45	190			178.5	38.07	8	0	296	233.5	592	568.5	3	11	314	47	64.5	708	232	404.5	285	625.33	415.5	422.5
11:15 PM		234	344	0	0	24	340.5	259	595.07	15.5	143.5	208.5	440	5.5	207.5	112	392.5	392.5	870.33	478	438.5	577.67	435.5	168	498.5	217.17	33			249	181.25	0	60	239	399	575.5	449.5	230	2.5	219.5	0	0	663	214	502	232.5	362.83	597.83	545
11:30 PM		226	390.91	0	152	0	162	218	269.32	400	21	701	237	1	14.5	438	660.5	285	765.83	126.5	242.83	450	414.5	291.5	406.17	118.42	121			342.5	57.8	14.5	7	8	245	503.5	365	123	148.5	67.5	5	0	705	188.5	534	117.5	366.67	568.5	545.5
11:45 PM		225	69	1.5	411	0	130	318	122.2	478	445.5	740.5	2.5	0	0	760	686.5	188	355.92	186.5	127	901.75	401	500	345.17	45.67	1			296.67	183.52	89.5	2	307	359	614.5	168	1	55	112.5	1	0	729	31	312	82	6.5	307	595.5
12:00 AM		343.5	283	30.5	318	20	220	151	267.42	306	38.5	437	11.5	200	2.5	329	658.5	364.5	606.75	365	115.5	599	430.17	257.5	243	25.5	27			110	164.83	21	19.5	286.5	312	482.5	231.5	174	212	269	9	1	641	119.5	218.5	4	19.5	450	574
12:15 AM		174.5	401.5	29.5	361	4	32.5	290.5	81.17	91	7	354.5	304	442	0	665.5	902.5	172.5	487	272	36.5	771.5	469.5	154.5	281.5	8.5	29.5			260.5	113.4	87	23.5	38.5	318.5	429.5	171.5	45.5	112	98.5	87.33	81	667.5	4	156.83	104.5	94.5	314.5	444
12:30 AM		309	191.5	533.5	176	7	7	338.5	0	0	9	336	374.33	331	76	753.5	1196.5	242.5	445	19	106.17	184.17	338.17	263.5	457.67	179.27	138.5			125	47.8	6	0	0	231.5	608.5	3	2	48	191	82.5	172	802.5	49	2	0	0.5	477.5	612.5
12:45 AM		292.5	252.5	285	280	154	1	246	6.33	38.33	127	576.5	414.17	405	115.5	1220	644	71	367.67	531	315.67	403	450	240	125	48.5	291			49.5	0	205	3	3	153	653	1	0	127	232	48	183	452	3	10	1	0	249.5	369.5
1:00 AM		156.5	138	369	348	214	6.5	228.5	0	117	481	586.5	188.17	627	379.5	390	1027	5	359.5	63.5	213.5	51.5	343.5	267	63.5	235.27	340			2.5	0	14.5	4	2	82	548	2.5	12	0	13.5	7	164.5	704.5	14.5	0	23.5	9.5	296.5	585.67
1:15 AM		191.5	133	71	352	325	21.5	249	65.5	1	442	17.5	32	520	464	473.5	748.5	8.5	18.5	309.5	314.17	4	304.5	223	5	146.52	204			7.5	0	2.5	18.5	1	3	512	3	29	0	469.5	136	0	635.5	209.5	7.5	3	152.5	150.5	637
1:30 AM		191.5	6.5	117.5	343	226	7	83	3	11	165.5	2.5	12	675	146	1046.5	752.5	2.5	2.5	390	305	54.5	334	6	1.5	199.1	214			265.5	4.5	2	147	15	1	638.5	2.5	1	2	60.5	147	1.5	532	205.5	2.5	19.5	507.67	0	441
1:45 AM		183.5	0	81.5	222	212	226	22.5	0	0	148	4	5.5	181.5	66.5	769	520	12	2.5	432	370.67	368	178	30.5	36	51.17	322			199.5	26.68	3.5	139	301	6	619.5	2.5	106	0	30.5	187.5	32	259	280	3	182.83	655	3	433.33
2:00 AM		69.5	553.5	4	262	368	224	2.5	15.83	74	9.5	198	5.5	2	7.5	772	434	6	0	73.5	349.17	669.17	66	0	245	12.83	40			10.5	54.53	12.5	94	435.5	35.67	587	527	199.5	26	1	164	137	83.5	121.5	34	185.67	600	1	391
2:15 AM		8	216	5	88	389	248	0	352	381	2.5	637.5	344.5	3	1	699	888.5	3	387.17	121	332.83	750.5	217	16	234.5	15.83	2.5			1.5	0	14.5	99.5	169.5	1	606	567	239	78	47	6.5	177.5	0	57.5	71.5	271.5	777.17	96	428
2:30 AM		1.5	148	62	10	294	230	0	496.25	527	12.5	244	231.17	2	4.5	614.5	426.5	128	551	349	429.83	198.5	203	25.5	282	33.17	59			191.5	78.13	4	203.67	466.5	3	520	480.5	70	0.5	23.5	2	333.5	2.5	20	220.83	105	252.83	428	146
2:45 AM		11.5	151	46.5	2	164	264	0	414.03	282.5	8	2.5	534	1	83.5	750	650.5	248	752.42	257	484	318	2	16	71	7.67	95.5			378.67	173.3	2	169	259.5	48	572.5	519	216.5	0	0	53	198.5	0	0	462	229.5	225.83	491.5	8
3:00 AM		110.5	100.5	7.5	6	182	170	11	288.55	344.5	11.5	7	302	3	0	368.5	457	216.5	428.17	22.5	299.67	70	15.5	30.5	2	29.5	139			488	92.62	51	45.67	317.67	106.5	609	537	2.5	2.5	67.5	207.5	159.5	0	0	228	389	210.83	322	2
3:15 AM		350.5	5	0	0	1	85	276	316.77	13	2.5	7	271.25	73	2.5	316	19.5	392	538.83	3	428.33	0	270.5	67	119.33	90.83	196			194	76.97	21.5	2	79.5	267.5	418	462.5	0	153.5	30	0	6	3	3.5	425.5	339.25	128	418	31
3:30 AM		366	122	17	7	0	125	174.5	485.98	3	24	0	216.17	528.5	2.5	6.5	12.5	291.5	549.17	0	69	0	400	192	2	141.58	148.5			395	5.13	81	0	102	179	593	562.5	24.5	86.5	20.5	0	0	69	143.5	293	18.5	0	332	242
3:45 AM		267	206	654	214	56	237	357.5	424.35	115	278.5	37.25	2	538	42.5	2	3.5	9	302	0	7	23	454	210	27.67	176.62	4.5			156	0	199	8.5	2	187.5	712.33	362	280	105	7.5	140	23.5	620	204.5	451.5	190	0	37	525
4:00 AM		415	0	357	247	14	27.5	260.5	92.5	51	316	347.5	1	556	1.5	0	541	3	350.33	56.5	148	27.5	289	158.5	14	80.08	23			194	0	51.5	35.5	20.5	376.5	499.5	237.5	6	4.5	161	2	98.5	840	61	232	5	0	3	522.17
4:15 AM		279.5	16	200	332	5	0	135.5	165.87	0.5	260.5	370	22	442.5	2.5	27	926	7	245.42	110	112	103.25	223.67	350	0	3.17	197.5			172	0	7.5	0	433.5	321.5	220.5	346.5	2	152	70	0	72	751.5	208	129	1	0	87	474.5
4:30 AM		147	116	69.5	256	4	7	96	280	3	24	325	17.5	439	6.5	2	652	8	2	270.5	2.5	448	110.67	258.5	197.17	19	5			78.5	23.93	0	0.5	239.5	202	129.5	244	1	0	187.5	24.5	1	387.5	161	0	4	0	356	520.17
4:45 AM		108	0	0	231	79	227.5	5	99.67	8.5	2.5	144.5	383.5	0	142.5	28	374	98	8	283.5	3	668.33	7	146.67	295.17	103.63	30.5			0	64.4	0	4	317	240	448.5	265.5	15	0	110.5	198	1	711	74	0	51	0	281	273.5
5:00 AM		173.5	62	0	449	171	383	0	9.83	245.5	3.5	5	355	0	341.5	0	915.5	84	7	259	42.5	138.5	5	74	681.17	38.5	16.5			0	0	18	235.5	121	302	725	131	108.5	7.5	87.5	304.5	30.5	826.5	76	0	3	220.67	343	15
5:15 AM		13	0	0	206	255	253	0	0	319.5	11.5	6.5	354	1.5	488	467.5	348	5.5	645.83	10	407	6.5	47.5	13.5	232	253.47	10.5			0	2.5	56.5	49	2	194.5	580	5	154.5	37.5	215.5	187.5	176.5	261	2.5	1.5	145	196.83	369	145
5:30 AM		2	0	155.5	27	293	146	0	4.5	471.5	123.5	7.5	289	3	77.5	578.5	306.5	2	609.5	2	229.67	11.5	26.5	0	61	231.65	155.5			174.5	201.22	2.5	0	0	153	647	6	7	27	94	108	169.5	158	0	286.5	276.5	502.5	307	6
5:45 AM		0.5	271.5	443	1	139	122	0	4	505	430	20.5	124.5	115.33	17	932	12	17.5	588.67	242	321.5	18.5	0	0	0	65.67	282.5			430	167.62	25	8	2	59	458.5	318	0	223.5	405	148	121.5	0	108.5	202	236.67	616.5	275.5	80
6:00 AM		51	510.5	77.5	295	361	1.5	75.5	26.33	235	360.67	301	10.5	596	0.5	878.5	97	182	699.5	232	364	225.33	264	41	0	9.33	212			489.5	179.15	32	0	209.67	1	568.5	623.5	0	80	107	40.5	332	1.5	225	294	225	745.17	391	329
6:15 AM		337.5	364	7	227	140	1	272	106.22	133.5	360	429.5	0	598.5	290	1104	573	310	592.33	303	236.67	710.33	320	10	143.5	4.67	28			341.5	54.95	202	3	457.67	257	469.5	649	0	148	0	222	48	0	8	260	323.63	383.17	299	503
6:30 AM*		536*	152*	42.5*	164*	4*	7.5*	280*	6.67*	21*	346*	440.5*	12.5*	431.5*	491*	692*	395.5*	123.5*	436.67*	12*	211.67*	626.5*	417.5*	16*	445*	0*	0*			233.5*	1*	168*	131.5*	352.67*	208.5*	122.5*	447*	116.5*	2*	1*	27*	4*	23*	1*	108*	3*	529.83*	380*	449.5*
6:45 AM*		229*	1.5*	4*	10*	0*	5.5*	322.5*	31.43*	0*	241.5*	287.5*	80*	297*	410*	719*	427.5*	22.5*	149*	0*	317.83*	326*	572*	206.5*	26*	0*	135*			447.5*	1*	114*	180.5*	316*	540.5*	4.5*	714*	139.5*	0*	0*	0*	0*	402*	2*	155*	3*	73*	246*	153.5*
7:00 AM*		279.5*	29.5*	0*	2*	4*	6*	211*	317.22*	15*	19.5*	99*	429.5*	187.5*	189.83*	519*	352.5*	1*	106.17*	0*	146.5*	79*	428*	134.5*	0*	4.67*	0.5*			194*	0*	110*	1*	500*	158*	540.5*	313*	170*	0*	16*	0*	0*	685*	0*	1*	0*	1*	127*	3.5*
[truncated: 1 more columns]

## Sheet: Fig 6 D FR1
	Contro;																														Ntn1 cKO DAT;;Vgat Cre
Day 1	4	1	28	8	76	74	91	123	76	169	86	55	55	88	81	40	134	132	138	30	11										114	16	110	80	121	3	233	5	45	84	79	17	51	96	27	11	8	3	3
Day 2	34	6	79	12	90	139	136	169	94	216	128	103	95	73	74	78	145	138	121	93	83										158	133	219	80	180	207	164	70	81	109	92	59	112	104	48	66	39	68	54
Day 3	79	40	109	14	75	159	162	93	43	180	138	136	115	65	91	127	178	155	126	111	115										118	149	94	69	110	133	172	214	151	107	148	93	143	118	81	57	74	72	97
[truncated: 2 more columns]

## Sheet: Fig 6 D FR5
	Contro;																									Ntn1 cKO DAT;;Vgat Cre
Day 1	107.4	101	116	94	42.2	55	121	118.2	126	74	154	97.6	87.4	123.2	83	81	86	118.6	91.8	72	84.6					120.6	76.8	110	92.4	105	117.4	121.4	96	97	176	102	75	92	112	74	65	97.6	89.4	51.6	98.6	77.2
Day 2	108	131	125	84.6	96.2	67	99	122	123	75	135	99	131	135	72	89	71	123	98.2	73.4	117.6					134.2	85.2	135.6	117.8	95.8	57.2	108.8	95.4	111	112	99	88	91.6	118	95	65.2	113.2	109.4	205.2	127.6	104.8
Day 3	112.2	153.2	107.4	78	85	70	72	110.2	122	88	142	89.4	128	124.6	67	78	67	95.6	110.8	78.8	107.8					166.8	83.6	129	81.2	113.2	73.6	127.8	106.2	103	120	96	70	92	92	101	62	120	120.8	143.8	107.8	65

## Sheet: Fig 6 E
Control																									Ntn1 cKO DAT;;Vgat Cre
316	356	306	485	376	356	356	452	241	0	519	519	430	277	223	286	356	366	531	356	531					507	419	496	397	408	507	408	463	441	452	366	430	386	336	386	519	531	485	408	463

## Sheet: Fig 6 F
	Control																							ntn1 cko
Day 1	206	217	315	218	361	344	161	301	320	341	495	226	318	388	183	177	194	306	330	227	257			685	209	443	306	424	485	117	272	340	239	254	197	447	196	291	370	359	485	329	191
Day 2	125	114	235	141	325	203	287	197	247	213	332	126	91	126	88	133	144	151	148	89	352			346	331	358	190	222	391	48	221	171	153	160	178	214	103	188	202	222	297	197	399
Day 3	145	88	181	129	211	94	228	81	196	263	290	122	91	125	56	106	106	53	112	81	198			250	252	406	191	257	374	70	204	222	107	159	123	214	108	158	124	155	261	136	322
Day 4	89	67	153	108	112	95	154	52	178	221	249	90	121	159	81	107	81	75	113	52	253			203	192	415	138	186	294	417	155	210	89	95	118	147	64	133	95	154	244	162	216
Day 5	70	61	217	96	94	64	163	125	169	149	271	76	95	96	66	92	52	97	56	67	178			291	201	363	114	262	142	432	149	120	65	103	86	100	50	88	169	178	176	96	238

## Sheet: Fig 6 G_x0009_
Startle pulse (dB)	Control																					sgNtn1
65	33.7	14.1	89.4	42	73.3	70.8	33.7	32.7	14.2	37.7	24.9	53.9	11.2	10.3	33.3	15.6	22.5	34.8	81.2	31.7	28.9	85	31.3	75.7	31.3	47.2	19	15.2	27.5	79.1	12.2	4.9	31.8	44	10.3	33.2	12.7	94.7	48.4	63	42	23
80	32.8	45.9	172.9	62.2	187.6	211.4	57.5	10.8	44.8	73.1	47.4	365.2	197.2	100.5	28.9	179.2	27.9	74.7	78.5	38.2	63.5	219.2	653.6	354	92	114.3	276.6	114.7	55	64.6	287.6	239.8	223.2	367.1	77.6	116.2	65	48.6	167.1	106	66	80.5
90	87.3	94.1	126.8	91.4	235.9	159.3	62.6	43	82	91	92.9	712.9	432.5	300.7	136.6	338.3	40.5	62.4	230.5	132.3	82.7	287.6	304.6	272.9	58.7	163.5	194.9	149.4	181.6	109.9	416	191.8	433.1	260.9	221.5	178.7	133.8	51.2	310.5	350.7	103.9	77.1
100	383.8	235.3	290.9	107.4	215.8	222.1	79.6	269	77.1	93.7	63	518	565	170.5	196.1	416.4	90	95.3	217.2	183.6	64.8	90.2	420	601.1	127.9	48.9	461.9	116.1	283.7	83	495.1	228	578.2	228.1	71.3	161.3	195.3	157.3	180.2	457	103.4	131.8
105	520.5	615.7	292.9	304.2	199.2	400.4	93.9	716.7	193.5	203.1	116.2	785.1	702.5	195.9	278.8	414.6	167	108.8	202.4	188.9	92.3	114.1	340	332.4	77.3	81.6	400.5	188.9	344.2	97.6	329.6	464.3	633.2	384.3	226.6	103.1	227.1	367.2	309.9	906.6	333.9	260.7
110	438	569.4	245.7	459.8	152.8	184.4	258.3	1243.1	300.6	545.7	120.6	678.7	1005.4	169.8	741.7	438.9	195.1	147.5	281.2	167	244.3	201.7	402.4	422.2	209.9	106	267.6	228.5	470.2	69.2	543	354.9	913.2	503.4	364.2	114.8	552.8	555.7	778.2	1396	324.5	273.4
120	431.5	487.3	298.1	464.7	175.3	258.6	457.5	1906.3	451.8	903.9	89.8	919.9	1256.4	360.9	1247.9	358	173.8	245.1	224.1	157.1	271.9	200.6	365.6	512.1	310.9	232.9	370.1	276.4	495.6	202.2	800.8	498.4	785.6	435.6	641.6	161.1	617.6	535.1	641.2	1104.8	647.9	229.8

## Sheet: Fig 6 H
	Control																					ntn1 cko																					sgNtn1
5 db	84.0407	28.4818	51.5588	77.1108	71.7239	68.4492	48.8846	33.2165	52.0398	70.8914	67.1094	54.6885	81.2431	58.3584	83.6626	65.2978	41.481	57.6996	84.0207	28.6743	77.5351	84.6863	42.0892	72.7578	61.8288	70.0958	71.5531	77.4322	22.1118	18.6472	70.1387	85.1645	78.717	56.8405	37.4739	59.7268	53.1855	47.6409	83.4873	64.3665	40.5366	26.7614
10 db	81.9186	33.266	59.2946	73.6886	73.1911	56.7609	67.8225	61.0429	60.0568	77.8565	79.1955	66.3126	84.3346	59.009	86.9426	71.7681	38.2045	65.0815	91.7226	59.4559	83.4412	88.9346	81.5197	85.9044	82.1246	79.0415	68.4559	80.7595	80.7724	12.9799	90.4121	87.2764	89.1321	56.5406	81.795	61.8464	86.7386	66.2391	91.8744	77.2982	72.5183	36.2564
15 db	82.395	36.2516	54.9104	82.6985	79.1264	49.6223	67.9384	62.898	84.4846	78.187	82.5382	82.8601	81.373	66.9169	86.0523	76.4162	28.2438	69.1674	91.5603	56.1483	82.8749	87.0904	82.2461	86.3442	89.0811	70.2875	78.0484	83.0741	87.3554	21.9378	85.6699	85.0772	93.0755	72.9045	89.0697	66.8394	87.9968	64.109	88.9152	90.6466	66.9715	38.5546

## Sheet: Fig 6 I Edge
Control																										Ntn1 cKO DAT;;Vgat Cre
343.61	404.605	298.899	391.658	463.797	443.844	475.008	474.474	536.27	322.789	535.869	474.875	378.512	411.144	445.646	427.027	426.627	414.681	406.607	284.084	328.662	351.685	283.283	358.225	394.728	390.591	398.132	316.049	463.063	351.885	420.354	463.263	452.853	429.429	474.875	378.512	411.144	445.646	427.027	426.627	414.681	389.056	395.062	431.765	285.352	450.918	363.363

## Sheet: Fig 6 I Center
Control																										Ntn1 cKO DAT;;Vgat Cre
50.9843	45.7791	61.9286	33.0998	20.6206	34.6346	29.9633	22.6226	17.2172	58.5919	14.0808	52.9863	36.8368	30.4304	56.5232	63.8639	48.1148	50.7841	95.1618	99.8332	83.2165	122.122	91.4915	91.4248	62.2623	74.8081	47.2473	83.5502	60.2603	118.919	53.8539	31.6316	26.0928	27.5609	27.4942	69.2025	38.4384	19.4861	55.9226	41.8418	65.3987	62.1955	56.9903	42.8428	84.351	26.1595	61.8619
